# Supplementary material for: Identification of benzothiazones containing a hexahydropyrrolo[3,4-c]pyrrol moiety as antitubercular agents against MDR-MTB
Source: Royal Society of Chemistry journal article supplement (doi:10.1039/d0ra00750a), 2020-01-01
Supplement: d0ra00750a1.pdf [file d0ra00750a1.pdf]

## **Supporting information**

**MIC determination.** MICs against replicating *M. tuberculosis* were determined by the microplate Alamar blue assay (MABA). PBTZ169 (synthesized by our lab), RIF and INH were included as positive controls. *M. tuberculosis* H37Rv (ATCC27294) and clinical isolate strains were grown to late log phase (70 to 100 Klett units) in Difco Middlebrook 7H9 Broth (catalog no. 271310) supplemented with 0.2% (vol/vol) glycerol, 0.05% Tween 80, and 10% (vol/vol) albumin-dextrose-catalase (BBL Middlebrook ADC Enrichment, catalog no. 212352) (7H9-ADCTG). Cultures were centrifuged, washed twice, and then suspended in phosphate-phosphate-buffered saline. Suspensions were then passed through an 8  $\mu$ m-pore-size filter to remove clumps, and aliquots were frozen at -80 °C. Two fold dilutions of test compounds and positive controls were prepared in 7H9-ADC-TG in a volume of 100  $\mu$ l in 96-well, black, clear-bottom microplates (BD Biosciences, Franklin Lakes, NJ). *M. tuberculosis* (100  $\mu$ l containing  $2 \times 10^5$  CFU) was added, yielding a final testing volume of 200  $\mu$ l. The plates were incubated at 37°C; on day 7 of incubation, 12.5  $\mu$ l of 20% Tween 80 and 20  $\mu$ l of Alamar blue were added to all wells. After incubation at 37 °C for 16 to 24 h, the fluorescence was read at an excitation of 530 nm and an emission of 590 nm. The MIC was defined as the lowest concentration effecting a reduction in fluorescence of  $\geq 90\%$  relative to the mean of replicate bacterium-only controls.

**Aqueous solubility determination.** Solubility was measured at pH 2.0 by using an HPLC-UV method. Test compounds were initially dissolved in 0.01 M HCl (approximately pH 2.0, 1 mL). The mixture was stirred for 12 h at room temperature and then filtered. The saturated solutions were transferred to other vials for analysis by HPLC-UV. Each sample was performed in triplicate. Aqueous concentration was determined by comparison of the peak area of the saturated solution with a standard curve plotted peak area versus known concentrations, which were prepared by solutions of test compound in ACN at 1.0, 0.1, 0.01, 0.001 mg/mL.

All samples were performed on an Agilent 1260 HPLC-UV system. Conditions (solvent A = methanol, solvent B = 0.1% TFA + H<sub>2</sub>O): Zorbax SB-C18 column (250 mm  $\times$  4.6 mm, 5  $\mu$ m, PN: 883975-902). Injection volume: 10  $\mu$ L. Flow: 0.5 mL/min. Gradient elution: 0.00 min, 40% A; 3 min, 50% A; 15 min, 100% A; 16 min, 40% A; 25 min 40%A. UV at 254 nm.

**Cytotoxicity determination.** Compounds were examined for toxicity ( $CC_{50}$ ) in a mammalian Vero cell line at concentrations from 1000 to 4  $\mu\text{g}/\text{ml}$ . The Vero cells were maintained in culture medium (Minimum Essential Medium with Earle's salt, supplemented with 10% fetal bovine serum) at 37 °C under 5%  $\text{CO}_2$ . Cells were seeded in 96-well plates at the plating density of  $1 \times 10^4$  cells per well and allowed to recover for 24 h. Culture medium was replaced by assay medium containing the compound to be tested or drug-free. After 72 h of exposure, cells were harvested and cell viability was assessed by MTT assay. The  $CC_{50}$  values were calculated by Bliss analyses.

**General Chemical Methods.** All commercially available solvents and reagents were used without further purification. All moisture sensitive reactions were carried out under Argon atmosphere in commercially available anhydrous solvents.  $^1\text{H}$  NMR spectra were determined on a Varian Mercury-400 or Bruker 500 M spectrometer in MeOD,  $\text{CDCl}_3$ , or  $\text{DMSO}-d_6$  using tetramethylsilane as an internal standard. Electrospray ionization (ESI) mass spectra was obtained on an Agilent 1260-6420 Mass spectrum instruments. The reagents were all of analytical grade or chemically pure. TLC was performed on silica gel plates (Merck, ART5554 60F254).

Purity was determined by HPLC, and all target compounds were confirmed to have >95% purity.

**Standard Drug.** Rifampicin (RFP) and isoniazid (INH) were purchased from Sigma. PBTZ169 was synthesized according to the published procedure (EMBO Mol. Med.2014, 6 (3), 372–83.).

**Purity determination.** All samples were performed on an Agilent 1260 HPLC-UV system. Conditions (solvent A = methanol, solvent B = 0.1% TFA +  $\text{H}_2\text{O}$ ): Zorbax SB-C18 column (250 mm  $\times$  4.6 mm, 5  $\mu\text{m}$ , PN: 883975-902). Injection volumn: 10  $\mu\text{L}$ . Flow: 0.5 mL/min. Gradient elution: 0.00 min, 40% A; 3 min, 50% A; 15 min, 100% A; 16 min, 40% A; 25 min 40%A. UV at 254 nm.

**General synthesis procedure for synthesis of compounds 1-34.** To a stirring solution of A (0.3 mmol) in MeOH (5 mL) was added the corresponding aldehyde (0.4 mmol) and  $\text{NaCNBH}_3$  (0.5 mmol) at room temperature. The mixture was adjusted to pH 6-7, stirred

overnight at room temperature, and quenched by 1 M NaOH solution (5 mL). The mixture was diluted by H<sub>2</sub>O (15 mL), and extracted by DCM (10 mL × 3). The combined organic layer was washed by brine, dried over anhydrous MgSO<sub>4</sub>, filtered, and concentrated. The residue was purified over silica gel column (DCM : MeOH = 20 : 1) to yield oils **B1-B34**.

To a stirred solution of **B1-B34** (0.2 mmol) in DCM (5 mL) was added TFA (1 mL) at room temperature. The mixture was stirred for 2 hours and concentrated to afford the crude product **B1-34** which was used directly in the next step without further purification.

To a stirred solution of above crude **B1-34** in anhydrous MeOH (10 mL) was added BTZ core compound **D** (0.2 mmol) and Et<sub>3</sub>N (0.6 mmol) at room temperature. The mixture was stirred overnight at 40 °C, and concentrated. The residue was purified by silica gel column (DCM : MeOH = 20 : 1) to yield the yellow solids **1-34**. (The data and NMR copies of compounds **1-34** were listed in the supporting information.)

**2-(5-(cyclohexylmethyl)hexahydropyrrolo[3,4-c]pyrrol-2(1H)-yl)-8-nitro-6-(trifluoromethyl)-4H-benzo[e][1,3]thiazin-4-one (1)**. According to above general procedure, employing cyclohexanecarbaldehyde afforded compound **1** as a yellow solid. <sup>1</sup>H NMR ( 500 MHz, CDCl<sub>3</sub>) δ 9.21 (s, 1H), 8.81 (s, 1H), 4.23 (s, 1H), 4.02-3.96 (m, 2H), 3.66 (s, 1H), 3.14-3.02 (brs, 2H), 2.72-2.54 (brs, 4H), 2.29 (s, 2H), 1.79-1.71 (m, 6H), 1.26-1.17(m, 3H), 0.91(s, 2H); <sup>13</sup>C NMR (125 MHz, CDCl<sub>3</sub>) δ 165.97, 159.88, 143.59, 134.62, 133.76 (q, J = 3.46 Hz), 129.59(q, J = 34.41 Hz), 126.87, 126.51, 125.90(q, J = 3.34 Hz), 122.54 (q, J = 274.1 Hz), 62.13, 60.23, 56.37, 53.44, 41.80, 39.94, 36.81, 31.78, 26.72, 26.05; ESI-MS: 483 (M + H)<sup>+</sup>. HRMS-ESI (m/z): Calcd. For C<sub>22</sub>H<sub>26</sub>F<sub>3</sub>N<sub>4</sub>O<sub>3</sub>S (M+H)<sup>+</sup>: 483.1672; Found: 483.1675.

**2-(5-(4-fluorobenzyl)hexahydropyrrolo[3,4-c]pyrrol-2(1H)-yl)-8-nitro-6-(trifluoromethyl)-4H-benzo[e][1,3]thiazin-4-one (2)**. According to above general procedure, employing 4-fluorobenzaldehyde afforded compound **2** as a yellow solid. mp: 178-180 °C; <sup>1</sup>H NMR ( 500 MHz, CDCl<sub>3</sub>) δ 9.21 (s, 1H), 8.82(s, 1H), 7.31 (s, 2H), 7.05-7.04 (s, 2H), 4.23 (s, 1H), 4.04-3.96 (m, 2H), 3.78-3.75 (m, 1H), 3.65(brs, 2H), 3.18-3.04(brs, 2H), 2.73-2.61 (brs, 3H), 1.64 (s, 1H), 1.30-1.27 (m, 3H); <sup>13</sup>C NMR(125 MHz, CDCl<sub>3</sub>) δ165.97, 143.61, 134.53, 133.79 (q, J=3.42 Hz), 130.02 (q, J = 35.30 Hz), 126.87, 125.93(q, J = 3.56 Hz), 123.78(q, J=272.01Hz), 115.42, 115.22, 59.60, 58.51, 58.35, 56.17,

53.22, 41.81, 39.99; ESI-MS: 495 (M + H)<sup>+</sup>; HRMS-ESI (m/z): Calcd. For C<sub>22</sub>H<sub>19</sub>F<sub>4</sub>N<sub>4</sub>O<sub>3</sub>S (M+H)<sup>+</sup>: 495.1109; Found: 495.1106.

**2-(5-(4-chlorobenzyl)hexahydropyrrolo[3,4-c]pyrrol-2(1H)-yl)-8-nitro-6-(trifluoromethyl)-4H-benzo[e][1,3]thiazin-4-one (3).** According to above general procedure, employing 4-chlorobenzaldehyde afforded compound **3** as a yellow solid. mp: 228-230 °C; <sup>1</sup>H NMR (500 MHz, CDCl<sub>3</sub>) δ 9.21(s, 1H), 8.81(s, 1H), 7.30 (s, 1H), 7.21-7.15 (m, 3H), 4.25-4.20 (brs, 1H), 4.03-3.95 (brs, 2H), 3.66 (brs, 3H), 3.17-3.04(brs, 2H), 2.74-2.64 (brs, 3H), 2.37 (s, 3H); <sup>13</sup>C NMR (125 MHz, CDCl<sub>3</sub>) δ 165.97, 159.92, 143.60, 134.60, 133.78(q, J = 3.42 Hz), 129.33 (q, J = 34.20 Hz), 128.64, 126.86, 125.90 (q, J = 3.41Hz), 122.40 (q, J = 270.12 Hz), 121.08, 59.57, 58.80, 56.20, 53.46, 53.21, 41.84, 40.01, 21.13; ESI-MS: 511 (M + H)<sup>+</sup>; HRMS-ESI (m/z): Calcd. For C<sub>22</sub>H<sub>19</sub>ClF<sub>3</sub>N<sub>4</sub>O<sub>3</sub>S (M+H)<sup>+</sup>: 511.0813; Found: 511.0817.

**2-(5-(4-bromobenzyl)hexahydropyrrolo[3,4-c]pyrrol-2(1H)-yl)-8-nitro-6-(trifluoromethyl)-4H-benzo[e][1,3]thiazin-4-one (4).** According to above general procedure, employing 4-bromobenzaldehyde afforded compound **4** as a yellow solid. mp: 237-239 °C; <sup>1</sup>H NMR (500 MHz, CDCl<sub>3</sub>) δ 9.20 (s, 1H), 8.81(s, 1H), 7.48 (s, 2H), 7.30-7.23 (brs, 2H), 4.22 (s, 1H), 4.01 (brs, 2H), 3.76-3.65 (brs, 3H), 3.18-3.05 (brs, 2H), 2.75-2.61 (brs, 2H), 1.64 (brs, 1H); <sup>13</sup>C NMR (125 MHz, CDCl<sub>3</sub>) δ 165.15, 159.52, 144.61, 138.93, 132.14, 131.55, 130.95, 130.12, 128.11 (q, J = 33.92 Hz), 126.71, 126.57, 123.45 (q, J = 253.41 Hz), 120.25, 59.98, 59.86, 58.09, 56.35, 53.52, 41.74; ESI-MS: 555 (M + H)<sup>+</sup>; HRMS-ESI (m/z): Calcd. For C<sub>22</sub>H<sub>19</sub>BrF<sub>3</sub>N<sub>4</sub>O<sub>3</sub>S (M+H)<sup>+</sup>: 555.0308; Found: 555.0310.

**2-(5-(4-cyanobenzyl)hexahydropyrrolo[3,4-c]pyrrol-2(1H)-yl)-8-nitro-6-(trifluoromethyl)-4H-benzo[e][1,3]thiazin-4-one (5).** According to above general procedure, employing 4-formylbenzonitrile afforded compound **5** as a yellow solid. mp: 232-234 °C; <sup>1</sup>H NMR (500 MHz, CDCl<sub>3</sub>) δ 9.20 (s, 1H), 8.81 (s, 1H), 7.65 (s, 2H), 7.45 (s, 1H), 7.30 (s, 1H), 4.24 (s, 1H), 4.05-3.96 (m, 2H), 3.71- 3.67 (m, 3H), 3.19-3.05 (m, 2H), 2.75-2.63 (m, 2H); <sup>13</sup>C NMR(125 MHz, CDCl<sub>3</sub>) δ 165.96, 159.99, 144.18, 143.60, 134.47, 133.78, 133.75 (q, J = 3.60 Hz), 132.93, 129.70 (q, J = 35.43 Hz), 129.04, 125.97 (q, J = 3.60 Hz), 122.35 (q, J = 273.50 Hz), 120.25, 118.76, 118.33, 111.17, 59.89, 58.71, 58.47,

53.47, 53.33, 41.84, 40.04; ESI-MS: 502 (M + H)<sup>+</sup>; HRMS-ESI (m/z): Calcd. For C<sub>23</sub>H<sub>19</sub>F<sub>3</sub>N<sub>5</sub>O<sub>3</sub>S (M+H)<sup>+</sup>: 502.1115; Found: 502.1114.

**8-nitro-2-(5-(4-nitrobenzyl)hexahydropyrrolo[3,4-c]pyrrol-2(1H)-yl)-6-**

**(trifluoromethyl)-4H-benzo[e][1,3]thiazin-4-one (6).** According to above general procedure, employing 4-nitrobenzaldehyde afforded compound **6** as a yellow solid. mp: 230-232 °C; <sup>1</sup>H NMR (500 MHz, CDCl<sub>3</sub>) δ 9.21 (s, 1H), 8.82 (s, 1H), 8.22-8.20 (m, 2H), 7.52-7.51 (m, 2H), 4.28-4.23 (m, 1H), 4.06-4.03 (m, 2H), 3.97-3.96 (m, 3H), 3.20-3.07 (m, 2H), 2.77-2.65 (m, 4H); <sup>13</sup>C NMR(125 MHz, CDCl<sub>3</sub>) δ 165.95, 160.01, 147.29, 146.29, 143.60, 134.46, 133.77 (q, J = 3.34 Hz), 129.25 (q, J = 35.40 Hz), 126.77, 126.47, 126.00, 125.96, 122.35 (q, J = 270.12 Hz), 59.94, 58.44, 53.35, 41.86, 40.05; ESI-MS: 522 (M + H)<sup>+</sup>; HRMS-ESI (m/z): Calcd. For C<sub>22</sub>H<sub>19</sub>F<sub>3</sub>N<sub>5</sub>O<sub>5</sub>S (M+H)<sup>+</sup>: 522.1054; Found: 522.1057.

**8-nitro-6-(trifluoromethyl)-2-(5-(4-(trifluoromethyl)benzyl) hexahydropyrrolo[3,4-**

**c]pyrrol-2(1H)-yl)-4H-benzo[e][1,3]thiazin-4-one (7).** According to above general procedure, employing 4-trifluorobenzaldehyde afforded compound **7** as a yellow solid. mp: 215-217 °C; <sup>1</sup>H NMR (500 MHz, CDCl<sub>3</sub>) δ 8.88-8.87 (m, 2H), 7.68-7.66 (m, 2H), 7.55-7.54 (m, 2H), 4.05-3.97 (m, 2H), 3.75-3.61 (m, 4H), 3.34-3.31 (m, 1H), 3.10 (s, 1H), 2.97 (s, 1H), 2.72-2.65 (m, 2H); <sup>13</sup>C NMR (125 MHz, CDCl<sub>3</sub>) δ 165.14, 159.52, 144.59, 144.47, 135.18, 132.13, 132.11 (q, J = 3.70 Hz), 129.38, 127.87 (q, J = 31.82 Hz), 126.70, 126.55, 126.52, 126.16, 125.54 (q, J = 3.36 Hz), 123.96 (q, J = 275.64 Hz), 60.04, 59.91, 58.29, 56.48, 53.51, 49.06, 41.77; ESI-MS: 545 (M + H)<sup>+</sup>; HRMS-ESI (m/z): Calcd. For C<sub>23</sub>H<sub>19</sub>F<sub>6</sub>N<sub>4</sub>O<sub>3</sub>S (M+H)<sup>+</sup>: 545.1077; Found: 545.1081.

**2-(5-(4-methoxybenzyl)hexahydropyrrolo[3,4-c]pyrrol-2(1H)-yl)-8-nitro-6-**

**(trifluoromethyl)-4H-benzo[e][1,3]thiazin-4-one (8).** According to above general procedure, employing 4-methoxybenzaldehyde afforded compound **8** as a yellow solid. mp: 192-194 °C; <sup>1</sup>H NMR (500 MHz, CDCl<sub>3</sub>) δ 9.21 (s, 1H), 8.81 (s, 1H), 7.24-7.23 (m, 2H), 6.89-6.87 (m, 2H), 4.22-4.20 (m, 1H), 4.02-3.94 (m, 2H), 3.84 (s, 3H), 3.77-3.75 (m, 2H), 3.66-3.61 (m, 2H), 3.15-3.02 (m, 2H), 2.72-2.61 (m, 4H); <sup>13</sup>C NMR (125 MHz, CDCl<sub>3</sub>) δ 165.97, 159.87, 158.82, 143.59, 134.62, 133.76 (q, J = 3.40 Hz), 129.07 (q, J = 35.13 Hz), 126.87, 125.91 (q, J = 3.58 Hz), 122.47 (q, J = 270.82 Hz), 114.14, 113.76 ,

59.68, 59.57, 58.47, 56.30, 55.28, 53.36, 41.84, 40.01; ESI-MS: 507 (M + H)<sup>+</sup>; HRMS-ESI (m/z): Calcd. For C<sub>23</sub>H<sub>22</sub>F<sub>3</sub>N<sub>4</sub>O<sub>4</sub>S (M+H)<sup>+</sup>: 507.1308; Found: 507.1305.

**2-(5-(4-(tert-butyl)benzyl)hexahydropyrrolo[3,4-c]pyrrol-2(1H)-yl)-8-nitro-6-(trifluoromethyl)-4H-benzo[e][1,3]thiazin-4-one (9).** According to above general procedure, employing 4-tert-butylbenzaldehyde afforded compound **9** as a yellow solid. mp: 81-83 °C; <sup>1</sup>H NMR (500 MHz, DMSO) δ 8.88-8.87 (m, 2H), 7.32-7.31 (m, 2H), 7.22-7.21 (m, 2H), 4.01-3.95 (m, 2H), 3.76-3.73 (m, 1H), 3.63-3.56 (m, 3H), 3.34 (s, 2H), 3.08-2.96 (brs, 2H), 2.69-2.62 (m, 2H), 1.27 (s, 9H); <sup>13</sup>C NMR (125 MHz, DMSO) δ 165.11, 159.49, 149.56, 144.58, 136.34, 135.18, 132.10 (q, J = 3.47 Hz), 128.45, 127.77 (q, J = 34.40 Hz), 126.53 (q, J = 3.40 Hz), 125.36, 123.15 (q, J = 272.95 Hz), 60.15, 59.99, 58.61, 56.40, 53.56, 41.75, 34.59, 31.63; ESI-MS: 533 (M + H)<sup>+</sup>; HRMS-ESI (m/z): Calcd. For C<sub>26</sub>H<sub>28</sub>F<sub>3</sub>N<sub>4</sub>O<sub>3</sub>S (M+H)<sup>+</sup>: 533.1829; Found: 533.1833.

**2-(5-(4-methylbenzyl)hexahydropyrrolo[3,4-c]pyrrol-2(1H)-yl)-8-nitro-6-(trifluoromethyl)-4H-benzo[e][1,3]thiazin-4-one (10).** According to above general procedure, employing 4-methylbenzaldehyde afforded compound **10** as a yellow solid. mp: 223-225 °C; <sup>1</sup>H NMR (500 MHz, CDCl<sub>3</sub>) δ 9.21 (s, 1H), 8.81 (s, 1H), 7.22-7.17 (m, 4H), 4.61 (s, 1H), 4.00-3.98 (m, 2H), 3.67 (brs, 3H), 3.18-3.05 (m, 2H), 2.75 (brs, 4H), 2.37 (s, 3H); <sup>13</sup>C NMR (125 MHz, CDCl<sub>3</sub>) δ 165.97, 159.98, 143.60, 134.57, 133.78 (q, J = 3.41 Hz), 129.46 (q, J = 35.52 Hz), 129.18, 128.70, 128.59, 126.85, 126.50, 126.15, 125.91 (q, J = 3.61 Hz), 122.54 (q, J = 273.08 Hz), 59.44, 58.77, 56.10, 46.31, 41.81, 39.98, 21.13; ESI-MS: 491 (M + H)<sup>+</sup>; HRMS-ESI (m/z): Calcd. For C<sub>23</sub>H<sub>22</sub>F<sub>3</sub>N<sub>4</sub>O<sub>3</sub>S (M+H)<sup>+</sup>: 491.1359; Found: 491.1360.

**8-nitro-2-(5-(4-(trifluoromethoxy)benzyl)hexahydropyrrolo[3,4-c]pyrrol-2(1H)-yl)-6-(trifluoromethyl)-4H-benzo[e][1,3]thiazin-4-one (11).** According to above general procedure, employing 4-(trifluoromethoxy)benzaldehyde afforded compound **11** as a yellow solid. mp: 188-189 °C; <sup>1</sup>H NMR (500 MHz, CDCl<sub>3</sub>) δ 9.21 (s, 1H), 8.81 (s, 1H), 7.35-7.20 (m, 4H), 4.24 (s, 1H), 4.02-3.96 (m, 2H), 3.66 (brs, 3H), 3.17-3.04 (m, 1H), 2.75-2.61 (m, 4H); <sup>13</sup>C NMR (125 MHz, CDCl<sub>3</sub>) δ 165.95, 160.33, 143.60, 134.42, 133.78 (q, J = 3.74 Hz), 127.80 (q, J = 35.40 Hz), 126.77, 125.98, 124.28, 122.40 (q, J = 273.50 Hz),

58.50, 58.28, 53.46, 41.78, 39.96; ESI-MS: 561 (M + H)<sup>+</sup>; HRMS-ESI (m/z): Calcd. For C<sub>23</sub>H<sub>19</sub>F<sub>6</sub>N<sub>4</sub>O<sub>4</sub>S (M+H)<sup>+</sup>: 561.1026; Found: 561.1028.

**2-(5-benzylhexahydropyrrolo[3,4-c]pyrrol-2(1H)-yl)-8-nitro-6-(trifluoromethyl)-4H-benzo[e][1,3]thiazin-4-one (12).** According to above general procedure, employing benzaldehyde afforded compound **12** as a yellow solid. <sup>1</sup>H NMR (500 MHz, DMSO) δ 8.88-8.87 (m, 2H), 7.30-7.24 (m, 5H), 4.03-3.96 (m, 2H), 3.74-3.72 (m, 1H), 3.60 (brs, 3H), 3.34 (brs, 1H), 3.09 (brs, 1H), 2.96 (brs, 1H), 2.69-2.62 (m, 2H); <sup>13</sup>C NMR (125 MHz, DMSO) δ 165.11, 159.48, 144.56, 139.39, 135.18, 132.11 (q, J = 3.60 Hz), 128.74, 128.65, 127.47 (q, J = 33.34 Hz), 127.27, 126.68, 126.52 (q, J = 3.46 Hz), 123.20 (q, J = 271.54 Hz), 60.07, 59.95, 58.94, 56.48, 56.38, 53.54, 41.75; ESI-MS: 477 (M + H)<sup>+</sup>; HRMS-ESI (m/z): Calcd. For C<sub>22</sub>H<sub>20</sub>F<sub>3</sub>N<sub>4</sub>O<sub>3</sub>S (M+H)<sup>+</sup>: 477.1203; Found: 477.1200.

**2-(5-(3-fluorobenzyl)hexahydropyrrolo[3,4-c]pyrrol-2(1H)-yl)-8-nitro-6-(trifluoromethyl)-4H-benzo[e][1,3]thiazin-4-one (13).** According to above general procedure, employing 3-fluorobenzaldehyde afforded compound **13** as a yellow solid. mp: 176-178 °C; <sup>1</sup>H NMR (500 MHz, DMSO) δ 8.88-8.86 (m, 2H), 7.36-7.34 (m, 1H), 7.16-7.04 (m, 3H), 4.03-3.96 (m, 2H), 3.76-3.74 (m, 2H), 3.62 (s, 3H), 3.34 (s, 1H), 3.09 (brs, 1H), 2.97 (brs, 1H), 2.71-2.63 (m, 2H); <sup>13</sup>C NMR (125 MHz, DMSO) δ 165.11, 163.90, 161.48, 159.49, 144.56, 142.61, 142.54, 135.17, 132.11 (q, J = 3.53 Hz), 130.58, 130.50, 130.10, 127.79 (q, J = 34.29 Hz), 126.69, 126.53 (q, J = 3.36 Hz), , 124.66, 124.64, 123.24 (q, J = 272.89 Hz), 115.30, 115.08, 114.14, 113.93, 60.03, 59.89, 58.20, 56.32, 53.51, 41.75; ESI-MS: 495 (M + H)<sup>+</sup>; HRMS-ESI (m/z): Calcd. For C<sub>22</sub>H<sub>19</sub>F<sub>4</sub>N<sub>4</sub>O<sub>3</sub>S (M+H)<sup>+</sup>: 495.1109; Found: 495.1111.

**2-(5-(3-chlorobenzyl)hexahydropyrrolo[3,4-c]pyrrol-2(1H)-yl)-8-nitro-6-(trifluoromethyl)-4H-benzo[e][1,3]thiazin-4-one (14).** According to above general procedure, employing 3-chlorobenzaldehyde afforded compound **14** as a yellow solid. mp: 177-180 °C; <sup>1</sup>H NMR (500 MHz, DMSO) δ 8.87 (s, 2H), 7.34-7.21 (m, 4H), 3.99-3.97 (m, 2H), 3.77-3.75 (m, 1H), 3.61 (brs, 3H), 3.34 (brs, 2H), 3.08 (brs, 1H), 2.96 (brs, 1H), 2.68-2.62 (m, 2H); <sup>13</sup>C NMR (125 MHz, DMSO) δ 165.11, 159.47, 144.56, 142.14, 135.16, 133.37, 132.12, 132.09, 130.54, 128.41, 127.76 (q, J = 34.66 Hz), 126.70, 126.52 (q, J =



3.54 Hz), 123.23 (q, J = 273.27 Hz), 60.04, 59.90, 58.07, 56.29, 53.51; ESI-MS: 511 (M + H)<sup>+</sup>; HRMS-ESI (m/z): Calcd. For C<sub>22</sub>H<sub>19</sub>ClF<sub>3</sub>N<sub>4</sub>O<sub>3</sub>S(M+H)<sup>+</sup>: 511.0813; Found: 511.0815.

**2-(5-(3-bromobenzyl)hexahydropyrrolo[3,4-c]pyrrol-2(1H)-yl)-8-nitro-6-(trifluoromethyl)-4H-benzo[e][1,3]thiazin-4-one (15).** According to above general procedure, employing 3-bromobenzaldehyde afforded compound **15** as a yellow solid. mp: 172-174 °C; <sup>1</sup>H NMR (500 MHz, DMSO) δ 8.88-8.87 (m, 2H), 7.48-7.42 (m, 2H), 7.32-7.28 (m, 2H), 4.01-3.95 (m, 2H), 3.78-3.75 (m, 1H), 3.63-3.60 (m, 3H), 3.34 (s, 1H), 3.09 (brs, 1H), 2.96 (brs, 1H), 2.69-2.62 (m, 2H); ESI-MS: 555 (M + H)<sup>+</sup>; HRMS-ESI (m/z): Calcd. For C<sub>22</sub>H<sub>19</sub>BrF<sub>3</sub>N<sub>4</sub>O<sub>3</sub>S (M+H)<sup>+</sup>: 555.0308; Found: 555.0306.

**3-((5-(8-nitro-4-oxo-6-(trifluoromethyl)-4H-benzo[e][1,3]thiazin-2-yl)hexahydropyrrolo[3,4-c]pyrrol-2(1H)-yl)methyl)benzotrile (16).** According to above general procedure, employing 3-formylbenzotrile afforded compound **16** as a yellow solid. <sup>1</sup>H NMR (500 MHz, DMSO) δ 8.88-8.87 (m, 2H), 7.74-7.66 (m, 3H), 7.55-7.52 (m, 1H), 4.00-3.96 (m, 2H), 3.77-3.75 (m, 1H), 3.66-3.62 (m, 3H), 3.34 (s, 1H), 3.09 (brs, 1H), 2.97 (brs, 1H), 2.71-2.64 (m, 2H); <sup>13</sup>C NMR (125 MHz, DMSO) δ 165.11, 159.47, 144.56, 141.26, 135.17, 133.67, 132.13, 131.19, 129.95, 127.79 (q, J = 35.18 Hz), 126.68, 126.53 (q, J = 3.61 Hz), 124.48 (q, J = 270.99 Hz), 119.32, 111.68, 60.01, 59.82, 57.81, 56.28, 53.47, 41.76; ESI-MS: 502 (M + H)<sup>+</sup> HRMS-ESI (m/z): Calcd. For C<sub>23</sub>H<sub>19</sub>F<sub>4</sub>N<sub>5</sub>O<sub>3</sub>S (M+H)<sup>+</sup>: 502.1155; Found: 502.1151.

**8-nitro-2-(5-(3-nitrobenzyl)hexahydropyrrolo[3,4-c]pyrrol-2(1H)-yl)-6-(trifluoromethyl)-4H-benzo[e][1,3]thiazin-4-one (17).** According to above general procedure, employing 3-nitrobenzaldehyde afforded compound **17** as a yellow solid. mp: 199-200 °C; <sup>1</sup>H NMR (500 MHz, DMSO) δ 8.87-8.86(m, 2H), 8.13-8.09(m, 2H), 7.77-7.76(m, 1H), 7.63-7.59(m, 1H), 4.01-3.95(m, 2H), 3.79-3.74(m, 3H), 3.64-3.62(m, 1H), 3.09(brs, 1H), 2.97(brs, 1H), 2.72-2.65(m, 2H); <sup>13</sup>C NMR(125 MHz, DMSO) δ 165.13, 159.49, 148.30, 144.57, 142.00, 135.42, 135.17, 132.12(q, J=3.52Hz), 130.22, 130.11, 127.95, 127.24 (q, J = 35.21 Hz), 126.54 (q, J = 3.47 Hz), 124.49, 122.02 (q, J = 270.12 Hz), 60.02, 59.87, 57.69, 56.29, 53.50, 41.77; ESI-MS: 522 (M + H)<sup>+</sup>; HRMS-ESI (m/z): Calcd. For C<sub>22</sub>H<sub>19</sub>F<sub>3</sub>N<sub>5</sub>O<sub>5</sub>S (M+H)<sup>+</sup>: 522.1054; Found: 522.1051.

**8-nitro-6-(trifluoromethyl)-2-(5-(3-(trifluoromethyl)benzyl)hexahydropyrrolo [3,4-c]pyrrol-2(1H)-yl)-4H-benzo[e][1,3]thiazin-4-one (18).** According to above general procedure, employing 3-(trifluoromethyl)benzaldehyde afforded compound **18** as a yellow solid. mp: 135-136 °C; <sup>1</sup>H NMR (500 MHz, DMSO) δ 8.88-8.87 (m, 2H), 7.62-7.56 (m, 4H), 4.01-3.97 (m, 3H), 3.79-3.62 (m, 5H), 3.34 (s, 1H), 3.10 (brs, 1H), 2.97 (brs, 1H), 2.70-2.63 (m, 2H); ESI-MS: 545 (M + H)<sup>+</sup>; HRMS-ESI (m/z): Calcd. For C<sub>23</sub>H<sub>19</sub>F<sub>6</sub>N<sub>4</sub>O<sub>3</sub>S (M+H)<sup>+</sup>: 545.1077; Found: 545.1080.

**2-(5-(3-methoxybenzyl)hexahydropyrrolo[3,4-c]pyrrol-2(1H)-yl)-8-nitro-6-(trifluoromethyl)-4H-benzo[e][1,3]thiazin-4-one (19).** According to above general procedure, employing 3-methoxybenzaldehyde afforded compound **19** as a yellow solid. mp: 101-102 °C; <sup>1</sup>H NMR( 500 MHz, CDCl<sub>3</sub>) δ 9.18 (s, 2H), 8.80 (s, 1H), 6.97-6.86 (m, 4H), 4.19-3.88 (m, 9H), 3.28-2.84 (m, 6H); ESI-MS: 507 (M + H)<sup>+</sup>; HRMS-ESI (m/z): Calcd. For C<sub>23</sub>H<sub>21</sub>F<sub>3</sub>N<sub>4</sub>O<sub>4</sub>S (M+H)<sup>+</sup>: 507.1308; Found: 507.1305.

**2-(5-(2-fluorobenzyl)hexahydropyrrolo[3,4-c]pyrrol-2(1H)-yl)-8-nitro-6-(trifluoromethyl)-4H-benzo[e][1,3]thiazin-4-one (20).** According to above general procedure, employing 2-fluorobenzaldehyde afforded compound **20** as a yellow solid. mp: 154-156 °C; <sup>1</sup>H NMR (500 MHz, DMSO) δ 8.88-8.86 (m, 2H), 7.43-7.40 (m, 1H), 7.32-7.31 (m, 1H), 7.18-7.14 (m, 2H), 4.02 (m, 2H), 3.73-3.59 (m, 5H), 3.34 (s, 3H), 3.08 (brs, 1H), 2.96 (brs, 1H), 2.71-2.64 (m, 4H); <sup>13</sup>C NMR (125 MHz, DMSO) δ 165.10, 162.09, 159.67, 159.50, 144.56, 135.17, 132.10 (q, J = 3.53 Hz), 131.58, 131.53, 130.10, 129.42, 129.34, 127.93 (q, J = 34.53 Hz), 127.25, 126.53 (q, J = 3.53 Hz), 125.65, 125.50, 124.70 (q, J = 3.25 Hz), 123.24 (q, J = 272.51 Hz), 115.66, 115.44, 59.86, 59.72, 56.33, 53.48, 51.31, 41.74; ESI-MS: 495 (M + H)<sup>+</sup>; HRMS-ESI (m/z): Calcd. For C<sub>22</sub>H<sub>19</sub>F<sub>4</sub>N<sub>4</sub>O<sub>3</sub>S (M+H)<sup>+</sup>: 495.1109; Found: 495.1110.

**2-(5-(3,4-difluorobenzyl)hexahydropyrrolo[3,4-c]pyrrol-2(1H)-yl)-8-nitro-6-(trifluoromethyl)-4H-benzo[e][1,3]thiazin-4-one (21).** According to above general procedure, employing 3,4-difluorobenzaldehyde afforded compound **21** as a yellow solid. mp: 151-153 °C; <sup>1</sup>H NMR (500 MHz, CDCl<sub>3</sub>) δ 9.20 (s, 1H), 8.81 (s, 1H), 7.31 (brs, 1H), 6.88-6.84 (m, 2H), 4.23 (brs, 1H), 4.03-3.94 (m, 2H), 3.69 (brs, 3H), 3.15 (brs, 1H), 3.03 (brs, 1H), 2.74 (brs, 2H), 2.67 (brs, 2H); <sup>13</sup>C NMR (125 MHz, DMSO) δ 165.11, 161.80 (q,

$J = 247.5$  Hz), 160.85 (q,  $J = 250.6$  Hz), 159.51, 144.58, 135.17, 132.80 (d,  $J = 3.3$  Hz), 132.11 (q,  $J = 3.7$  Hz), 127.77 (q,  $J = 36.0$  Hz), 126.68, 126.53 (q,  $J = 3.7$  Hz), 123.13 (q,  $J = 272.7$  Hz), 122.05 (d,  $J = 3.5$  Hz), 121.90 (d,  $J = 3.5$  Hz), 111.82 (d,  $J = 3.8$  Hz), 111.61 (d,  $J = 3.9$  Hz), 104.05 (t,  $J = 26.3$  Hz), 59.66 (d,  $J = 14.7$  Hz), 56.32, 53.46, 50.86, 41.72; ESI-MS: 513 (M + H)<sup>+</sup>; HRMS-ESI (m/z): Calcd. For C<sub>22</sub>H<sub>18</sub>F<sub>5</sub>N<sub>4</sub>O<sub>3</sub>S (M+H)<sup>+</sup>: 513.1014; Found: 513.1017.

**2-(5-(3,4-dichlorobenzyl)hexahydropyrrolo[3,4-c]pyrrol-2(1H)-yl)-8-nitro-6-(trifluoromethyl)-4H-benzo[e][1,3]thiazin-4-one (22).** According to above general procedure, employing 3,4-dichlorobenzaldehyde afforded compound **22** as a yellow solid. mp: 113-115 °C; <sup>1</sup>H NMR (500 MHz, DMSO) δ 8.89 (s, 1H), 8.87 (s, 1H), 7.58 (s, 1H), 7.50 (d,  $J = 8.2$  Hz, 1H), 7.40 (d,  $J = 8.2$  Hz, 1H), 4.03-4.00 (m, 2H), 3.75-3.72 (m, 1H), 3.69 (s, 2H), 3.63-3.60 (m, 1H), 3.10 (brs, 1H), 2.97 (brs, 1H), 2.72 (d,  $J = 8.4$  Hz, 1H), 2.69 (d,  $J = 8.4$  Hz, 1H), 2.60-2.56 (m, 2H); <sup>13</sup>C NMR (125 MHz, DMSO) δ 165.13, 159.51, 144.58, 135.90, 135.18, 134.16, 132.52, 132.13 (q,  $J = 3.7$  Hz), 129.05, 127.95, 127.74, 127.61, 127.26, 126.69, 126.54 (q,  $J = 3.7$  Hz), 124.49, 121.78, 59.90, 56.28, 55.10, 53.49, 41.77; ESI-MS: 545 (M + H)<sup>+</sup>; HRMS-ESI (m/z): Calcd. For C<sub>22</sub>H<sub>18</sub>Cl<sub>2</sub>F<sub>3</sub>N<sub>4</sub>O<sub>3</sub>S (M+H)<sup>+</sup>: 545.0423; Found: 545.0425.

**2-(5-(3-chloro-4-fluorobenzyl)hexahydropyrrolo[3,4-c]pyrrol-2(1H)-yl)-8-nitro-6-(trifluoromethyl)-4H-benzo[e][1,3]thiazin-4-one (23).** According to above general procedure, employing 3-chloro-4-fluorobenzaldehyde afforded compound **23** as a yellow solid. mp: 73-75 °C; <sup>1</sup>H NMR (500 MHz, DMSO) δ 8.85 (d,  $J = 7.11$  Hz, 2H), 7.4 (d,  $J = 6.77$  Hz, 1H), 7.35-7.31 (m, 2H), 3.99-3.93 (m, 2H), 3.74 (d,  $J = 12.78$  Hz, 1H), 3.61-3.58 (m, 4H), 3.06 (brs, 1H), 2.94 (brs, 1H), 2.68-2.66 (m, 1H), 2.62-2.61 (m, 1H), 2.53 (brs, 1H); <sup>13</sup>C NMR (125 MHz, DMSO) δ 165.12, 159.49, 156.622 (d,  $J = 246.52$  Hz), 144.57, 137.38, 135.16, 132.23 (q,  $J = 3.79$  Hz), 130.58, 129.31 (d,  $J = 7.05$  Hz), 127.79 (q,  $J = 34.30$  Hz), 126.70, 126.55 (q,  $J = 3.55$  Hz), 123.13 (q,  $J = 272.73$  Hz), 119.56 (d,  $J = 17.68$  Hz), 117.08 (d,  $J = 20.80$  Hz), 59.83, (d,  $J = 14.98$  Hz), 57.34, 56.25, 53.45, 41.72; ESI-MS: 529 (M + H)<sup>+</sup>; HRMS-ESI (m/z): Calcd. For C<sub>22</sub>H<sub>18</sub>ClF<sub>4</sub>N<sub>4</sub>O<sub>3</sub>S (M+H)<sup>+</sup>: 529.0719; Found: 529.0716.

**2-(5-(4-chloro-3-fluorobenzyl)hexahydropyrrolo[3,4-c]pyrrol-2(1H)-yl)-8-nitro-6-(trifluoromethyl)-4H-benzo[e][1,3]thiazin-4-one (24).** According to above general procedure, employing 4-chloro-3-fluorobenzaldehyde afforded compound **24** as a yellow solid. mp: 204-206 °C; <sup>1</sup>H NMR (500 MHz, DMSO) δ 9.16 (s, 1H), 8.77 (s, 1H), 7.30 (t, *J* = 7.81 Hz, 1H), 7.08 (d, *J* = 9.73 Hz, 1H), 7.00 (d, *J* = 7.85 Hz, 1H), 4.22-4.17 (m, 1H), 3.98 (t, *J* = 9.90 Hz, 1H), 3.91-3.89 (m, 1H), 3.60-3.54 (m, 3H), 3.12 (brs, 1H), 2.99 (brs, 1H), 2.69 (brs, 2H), 2.58-2.56 (m, 2H); <sup>13</sup>C NMR (125 MHz, DMSO) δ 166.09, 160.10, 159.45, 156.97, 143.72, 134.62, 133.90 (q, *J* = 3.35 Hz), 130.63, 129.78 (q, *J* = 35.51 Hz), 126.95, 126.05 (q, 3.65 Hz), 124.81, 122.54 (q, *J* = 273.48 Hz), 116.64 (d, *J* = 21.46 Hz), 59.87 (d, *J* = 14.46 Hz), 58.24, 56.29, 53.39, 41.96, 40.14; ESI-MS: 529 (M + H)<sup>+</sup>; HRMS-ESI (m/z): Calcd. For C<sub>22</sub>H<sub>18</sub>ClF<sub>4</sub>N<sub>4</sub>O<sub>3</sub>S (M+H)<sup>+</sup>: 529.0719; Found: 529.0721.

**2-(5-(2-chloro-4-fluorobenzyl)hexahydropyrrolo[3,4-c]pyrrol-2(1H)-yl)-8-nitro-6-(trifluoromethyl)-4H-benzo[e][1,3]thiazin-4-one (25).** According to above general procedure, employing 2-chloro-4-fluorobenzaldehyde afforded compound **25** as a yellow solid. mp: 149-151 °C; <sup>1</sup>H NMR (500 MHz, DMSO) δ 8.85 (s, 1H), 8.83 (s, 1H), 7.49 (t, *J* = 7.10 Hz, 1H), 7.36 (d, *J* = 8.57 Hz, 1H), 7.17 (t, *J* = 8.05 Hz, 1H), 4.14-3.94 (m, 2H), 3.71 (d, *J* = 12.75 Hz, 1H), 3.66 (s, 1H), 3.58 (d, *J* = 10.19 Hz, 1H), 3.07 (brs, 1H), 3.07 (brs, 1H), 2.95 (brs, 1H), 2.71 (d, *J* = 8.69 Hz, 1H), 2.65 (d, *J* = 8.69 Hz, 1H), 2.57 (brs, 2H); <sup>13</sup>C NMR (125 MHz, DMSO) δ 164.64, 160.80 (d, *J* = 246.23 Hz), 159.03, 144.10, 134.70, 133.44 (d, *J* = 10.57 Hz), 132.57 (d, *J* = 3.33 Hz), 131.80, 131.72, 131.64 (q, *J* = 3.71 Hz), 127.31 (q, *J* = 34.65 Hz), 126.21, 126.07 (q, *J* = 3.50 Hz), 122.66 (q, *J* = 272.59 Hz), 116.36 (d, *J* = 24.63 Hz), 114.20 (d, *J* = 20.61 Hz), 59.39 (d, *J* = 11.95 Hz), 55.83, 54.55, 53.01, 41.30; ESI-MS: 529 (M + H)<sup>+</sup>; HRMS-ESI (m/z): Calcd. For C<sub>22</sub>H<sub>18</sub>ClF<sub>4</sub>N<sub>4</sub>O<sub>3</sub>S (M+H)<sup>+</sup>: 529.0719; Found: 529.0717.

**2-(5-(2,4-difluorobenzyl)hexahydropyrrolo[3,4-c]pyrrol-2(1H)-yl)-8-nitro-6-(trifluoromethyl)-4H-benzo[e][1,3]thiazin-4-one (26).** According to above general procedure, employing 2,4-difluorobenzaldehyde afforded compound **26** as a yellow solid. mp: 144-146 °C; <sup>1</sup>H NMR (500 MHz, CDCl<sub>3</sub>) δ 9.20 (s, 1H), 8.81 (s, 1H), 7.31 (brs, 1H), 6.88-6.84 (m, 2H), 4.23 (brs, 1H), 4.03-3.94 (m, 2H), 3.69 (brs, 3H), 3.15 (brs, 1H), 3.03 (brs, 1H), 2.74 (brs, 2H), 2.67 (brs, 2H); <sup>13</sup>C NMR (125 MHz, DMSO) δ 165.11, 161.80 (q, *J* = 247.5 Hz), 160.85 (q, *J* = 250.6 Hz), 159.51, 144.58, 135.17, 132.80 (d, *J* = 3.3 Hz),

132.11 (q,  $J = 3.7$  Hz), 127.77 (q,  $J = 36.0$  Hz), 126.68, 126.53 (q,  $J = 3.7$  Hz), 123.13 (q,  $J = 272.7$  Hz), 122.05 (d,  $J = 3.5$  Hz), 121.90 (d,  $J = 3.5$  Hz), 111.82 (d,  $J = 3.8$  Hz), 111.61 (d,  $J = 3.9$  Hz), 104.05 (t,  $J = 26.3$  Hz), 59.66 (d,  $J = 14.7$  Hz), 56.32, 53.46, 50.86, 41.72; ESI-MS: 513 (M + H)<sup>+</sup>; HRMS-ESI (m/z): Calcd. For C<sub>22</sub>H<sub>19</sub>F<sub>5</sub>N<sub>4</sub>O<sub>3</sub>S (M+H)<sup>+</sup>: 513.1014; Found: 513.1016.

**2-(5-(2,4-dichlorobenzyl)hexahydropyrrolo[3,4-c]pyrrol-2(1H)-yl)-8-nitro-6-(trifluoromethyl)-4H-benzo[e][1,3]thiazin-4-one (27).** According to above general procedure, employing 2,4-dichlorobenzaldehyde afforded compound **27** as a yellow solid. mp: 106-108 °C; <sup>1</sup>H NMR (500 MHz, DMSO) δ 8.89 (s, 1H), 8.87 (s, 1H), 7.58 (s, 1H), 7.50 (d,  $J = 8.2$  Hz, 1H), 7.40 (d,  $J = 8.2$  Hz, 1H), 4.03-4.00 (m, 2H), 3.75-3.72 (m, 1H), 3.69 (s, 2H), 3.63-3.60 (m, 1H), 3.10 (brs, 1H), 2.97 (brs, 1H), 2.72 (d,  $J = 8.4$  Hz, 1H), 2.69 (d,  $J = 8.4$  Hz, 1H), 2.60-2.56 (m, 2H); <sup>13</sup>C NMR (125 MHz, DMSO) δ 165.13, 159.51, 144.58, 135.90, 135.18, 134.16, 132.52, 132.13 (q,  $J = 3.7$  Hz), 129.05, 127.95, 127.74, 127.61, 127.26, 126.69, 126.54 (q,  $J = 3.7$  Hz), 124.49, 121.78, 59.90, 56.28, 55.10, 53.49, 41.77; ESI-MS: 545 (M + H)<sup>+</sup>; HRMS-ESI (m/z): Calcd. For C<sub>22</sub>H<sub>19</sub>F<sub>4</sub>N<sub>4</sub>O<sub>3</sub>S (M+H)<sup>+</sup>: 545.0423; Found: 545.0422.

**2-(5-(2-bromo-4-fluorobenzyl)hexahydropyrrolo[3,4-c]pyrrol-2(1H)-yl)-8-nitro-6-(trifluoromethyl)-4H-benzo[e][1,3]thiazin-4-one (28).** According to above general procedure, employing 2-bromo-4-fluorobenzaldehyde afforded compound **28** as a yellow solid. mp: 150-151 °C; <sup>1</sup>H NMR (500 MHz, DMSO) δ 8.88 (s, 1H), 8.87 (s, 1H), 7.55-7.49 (m, 2H), 7.25-7.24 (m, 1H), 4.02-3.98 (m, 2H), 3.75-3.61 (m, 4H), 3.10 (brs, 1H), 2.98 (brs, 1H), 2.76-2.68 (m, 2H), 2.60-2.59 (m, 2H); <sup>13</sup>C NMR (125 MHz, DMSO) δ 165.12, 161.17 (d,  $J = 247.45$  Hz), 159.49, 144.57, 135.18, 134.68 (d,  $J = 3.26$  Hz), 132.12 (d,  $J = 8.29$  Hz), 127.78 (q,  $J = 34.50$  Hz), 127.26, 127.20, 126.68, 126.56, 123.90 (d,  $J = 9.64$  Hz), 123.13 (q,  $J = 272.48$  Hz), 119.91 (d,  $J = 24.48$  Hz), 115.10, 59.84, 57.47, 56.48, 56.32, 53.51, 41.78; ESI-MS: 573 (M + H)<sup>+</sup>; HRMS-ESI (m/z): Calcd. For C<sub>22</sub>H<sub>19</sub>F<sub>4</sub>N<sub>4</sub>O<sub>3</sub>S (M+H)<sup>+</sup>: 573.0214; Found: 573.0216.

**8-nitro-2-(5-(pyridin-2-ylmethyl)hexahydropyrrolo[3,4-c]pyrrol-2(1H)-yl)-6-(trifluoromethyl)-4H-benzo[e][1,3]thiazin-4-one (29).** According to above general procedure, employing picolinaldehyde afforded compound **29** as a yellow solid. mp: 18-

174 °C; <sup>1</sup>H NMR (500 MHz, DMSO) δ 8.88 (s, 1H), 8.87 (s, 1H), 8.50 (s, 1H), 7.76 (brs, 1H), 7.44-7.42(m, 1H), 7.28 (s, 1H), 4.05-3.98 (m, 2H), 3.79-3.63 (m, 4H), 3.13 (brs, 1H), 3.00 (brs, 1H), 2.80-2.57 (m, 4H); <sup>13</sup>C NMR (125 MHz, DMSO) δ 165.97, 160.18, 149.30, 143.59, 137.00, 134.50, 133.78, 133.75, 133.72, 129.68 (q, *J* = 35.54 Hz), 126.78, 125.95 (q, *J* = 3.72 Hz), 125.89, 123.41, 122.76, 122.41 (q, *J* = 272.14 Hz), 60.27, 59.48, 55.72, 52.79, 41.85, 40.05; ESI-MS: 478 (M + H)<sup>+</sup>; HRMS-ESI (m/z): Calcd. For C<sub>21</sub>H<sub>19</sub>F<sub>4</sub>N<sub>5</sub>O<sub>3</sub>S (M+H)<sup>+</sup>: 478.1155; Found: 478.1157.

**8-nitro-2-(5-(pyridin-3-ylmethyl)hexahydropyrrolo[3,4-c]pyrrol-2(1H)-yl)-6-(trifluoromethyl)-4H-benzo[e][1,3]thiazin-4-one (30).** According to above general procedure, employing nicotinaldehyde afforded compound **30** as a yellow solid. mp: 124-130 °C; <sup>1</sup>H NMR (500 MHz, DMSO) δ 9.14 (s, 1H), 8.76 (s, 1H), 8.62-8.53 (m, 3H), 7.70 (brs, 1H), 4.17 (brs, 1.5H), 3.97-3.93 (m, 2.5H), 3.75-3.65 (m, 4H), 3.17 (brs, 1H), 3.04 (brs, 1H), 2.76 (brs, 3H); ESI-MS: 478 (M + H)<sup>+</sup>; HRMS-ESI (m/z): Calcd. For C<sub>21</sub>H<sub>19</sub>F<sub>4</sub>N<sub>5</sub>O<sub>3</sub>S (M+H)<sup>+</sup>: 478.1155; Found: 478.1153.

**8-nitro-2-(5-(pyridin-4-ylmethyl)hexahydropyrrolo[3,4-c]pyrrol-2(1H)-yl)-6-(trifluoromethyl)-4H-benzo[e][1,3]thiazin-4-one (31).** According to above general procedure, employing isonicotinaldehyde afforded compound **31** as a yellow solid. mp: 83-90 °C; <sup>1</sup>H NMR (500 MHz, DMSO) δ 8.88 (d, *J*=6.0Hz, 2H), 8.51 (d,*J*=3.6Hz, 2H), 7.34 (d, *J*=3.8Hz, 2H), 4.06-3.98 (m, 2H), 3.76-3.65 (m, 4H), 3.12 (brs, 1H), 3.02 (brs, 1H), 2.75-2.53 (m, 2H); <sup>13</sup>C NMR (125 MHz, DMSO) δ 165.10, 159.50, 150.40, 149.97, 148.54, 144.55, 135.17, 132.12 (q, *J* = 3.61 Hz), 127.79 (q, *J* = 34.71 Hz), 126.66, 126.54 (q, *J* = 3.56 Hz), 123.80, 123.13 (q, *J* = 272.56 Hz), 121.69, 60.06, 59.91, 57.62, 56.32, 53.47, 41.80; ESI-MS: 478 (M + H)<sup>+</sup>; HRMS-ESI (m/z): Calcd. For C<sub>21</sub>H<sub>19</sub>F<sub>4</sub>N<sub>5</sub>O<sub>3</sub>S (M+H)<sup>+</sup>: 478.1155; Found: 478.1158.

**2-(5-(naphthalen-2-ylmethyl)hexahydropyrrolo[3,4-c]pyrrol-2(1H)-yl)-8-nitro-6-(trifluoromethyl)-4H-benzo[e][1,3]thiazin-4-one (32).** According to above general procedure, employing 2-naphthaldehyde afforded compound **32** as a yellow solid. mp: 126-128 °C; <sup>1</sup>H NMR (500 MHz, DMSO) δ 8.87 (s, 2H), 7.86-7.83 (m, 3H), 7.28 (s, 1H), 7.48-7.47 (s, 3H) , 4.02-3.95 (m, 2H), 3.77-3.75 (m, 3H), 3.63-3.61 (m, 1H), 3.09 (brs, 1H), 2.97 (brs, 1H), 2.72-2.65 (m, 2H), 2.59-2.56 (m, 2H); <sup>13</sup>C NMR (125 MHz, DMSO)

$\delta$  165.12, 159.49, 144.56, 137.17, 135.18, 133.36, 132.67, 132.10 (q,  $J = 3.5$  Hz), 130.11, 128.15, 127.94 (q,  $J = 5.3$  Hz), 127.59, 127.38, 127.20, 126.96, 126.70, 126.52 (q,  $J = 3.6$  Hz), 126.44, 123.14 (q,  $J = 273.2$  Hz), 121.78, 119.07, 60.13, 59.07, 56.35, 53.55, 41.78; ESI-MS: 527 (M + H)<sup>+</sup>; HRMS-ESI (m/z): Calcd. For C<sub>26</sub>H<sub>22</sub>F<sub>3</sub>N<sub>4</sub>O<sub>3</sub>S (M+H)<sup>+</sup>: 527.1359; Found: 527.1361.

**2-(5-(naphthalen-1-ylmethyl)hexahydropyrrolo[3,4-c]pyrrol-2(1H)-yl)-8-nitro-6-(trifluoromethyl)-4H-benzo[e][1,3]thiazin-4-one (33).** According to above general procedure, employing 1-naphthaldehyde afforded compound **33** as a yellow solid. mp: 111-113 °C; <sup>1</sup>H NMR (500 MHz, DMSO)  $\delta$  8.87 (s, 1H), 8.85 (s, 1H), 8.265 (d,  $J = 8.1$  Hz, 1H), 7.86 (d,  $J = 7.9$  Hz, 1H), 7.81 (d,  $J = 7.4$  Hz, 1H), 7.45-7.42 (m, 2H), 7.38-7.31 (m, 2H), 4.05-3.86 (m, 4H), 3.77 (d,  $J = 13.0$  Hz, 1H), 3.54 (d,  $J = 11.1$  Hz, 1H), 3.05 (brs, 1H), 3.94 (brs, 1H), 2.68 (d,  $J = 8.9$  Hz, 2H), 2.60-2.55 (m, 2H); <sup>13</sup>C NMR (125 MHz, DMSO)  $\delta$  165.06, 159.32, 144.51, 135.29, 135.13, 133.80, 132.18, 132.08 (q,  $J = 3.7$  Hz), 128.59, 128.09, 127.76 (q,  $J = 34.5$  Hz), 126.87, 126.69, 126.52 (q,  $J = 3.6$  Hz), 125.94 (q,  $J = 5.8$  Hz), 125.75, 124.94, 123.14 (q,  $J = 272.6$  Hz), 60.25 (d,  $J = 22.4$  Hz), 57.29, 56.34, 53.60, 41.72; ESI-MS: 527 (M + H)<sup>+</sup>; HRMS-ESI (m/z): Calcd. For C<sub>26</sub>H<sub>22</sub>F<sub>3</sub>N<sub>4</sub>O<sub>3</sub>S (M+H)<sup>+</sup>: 527.1359; Found: 527.1362.

**2-(5-((5-methoxy-1H-indol-3-yl)methyl)hexahydropyrrolo[3,4-c]pyrrol-2(1H)-yl)-8-nitro-6-(trifluoromethyl)-4H-benzo[e][1,3]thiazin-4-one (34).** According to above general procedure, employing 5-methoxy-1H-indole-3-carbaldehyde afforded compound **34** as a yellow solid. mp: 225-228 °C; <sup>1</sup>H NMR (500 MHz, DMSO)  $\delta$  10.69 (s, 1H), 8.86 (s, 2H), 7.19 (d,  $J = 8.74$  Hz, 1H), 7.15 (s, 1H), 7.06 (s, 1H), 6.66 (d,  $J = 8.57$  Hz, 1H), 3.94 (q,  $J = 9.54$  Hz, 2H), 3.74-3.70 (m, 3H), 3.57 (s, 4H), 3.04 (brs, 1H), 2.91 (brs, 1H), 2.72 (d,  $J = 8.84$  Hz, 1H), 2.67 (d,  $J = 8.84$  Hz, 1H), 2.45 (brs, 2H); ESI-MS: 546 (M + H)<sup>+</sup>; HRMS-ESI (m/z): Calcd. For C<sub>25</sub>H<sub>23</sub>F<sub>3</sub>N<sub>5</sub>O<sub>4</sub>S (M+H)<sup>+</sup>: 546.1417; Found: 546.1420.

**Synthesis of compound 35.** To a stirred solution of A (42 mg, 0.2 mmol) in anhydrous MeOH (10 mL) was added BTZ core compound **D** (64 mg, 0.2 mmol) and Et<sub>3</sub>N (0.6 mmol) at room temperature. The mixture was stirred overnight at 40 °C, and concentrated. The residue was purified by silica gel column (DCM : MeOH = 20 : 1) to yield the yellow solids **35** (53 mg, 54% yield), mp: 204-205 °C; <sup>1</sup>H NMR (125 MHz, DMSO)  $\delta$  8.88 (s, 1H), 8.87

(s, 1H), 3.98 (brs, 2H), 3.97-3.57 (m, 4H), 3.34-3.29 (m, 1H), 3.25-3.22 (m, 1H), 3.14 (brs, 1H), 3.03 (brs, 1H); 1.43 (s, 9H); ESI-MS: 487 (M + H)<sup>+</sup>; HRMS-ESI (m/z): Calcd. For C<sub>20</sub>H<sub>21</sub>F<sub>3</sub>N<sub>4</sub>O<sub>5</sub>S (M+H)<sup>+</sup>: 487.1258; Found: 487.1261.

**Synthesis of compound 36.** To a stirred solution of **35** (97 mg, 0.2 mmol) in DCM (5 mL) was added TFA (1 mL) at room temperature. The mixture was stirred for 2 hours and concentrated. The residue was diluted by DCM, and washed by NaHCO<sub>3</sub> solution (1 M), and saturated saline, dried over anhydrous MgSO<sub>4</sub>, filtered and concentrated. The residue was purified over silica gel column (DCM : MeOH = 20 : 1) to compound **36** as a yellow solid (43 mg, 56% yield), mp: 219-221 °C; <sup>1</sup>H NMR (500 MHz, DMSO) δ 8.90 (s, 1H), 8.89 (s, 1H), 4.00-3.96 (m, 2H), 3.86 (d, *J* = 10.7 Hz, 1H), 3.77 (d, *J* = 8.50 Hz, 1H), 3.50-3.46 (m, 2H), 3.33 (d, *J* = 9.00 Hz, 3H), 3.25-3.20 (m, 2H); ESI-MS: 387 (M + H)<sup>+</sup>; HRMS-ESI (m/z): Calcd. For C<sub>15</sub>H<sub>13</sub>F<sub>3</sub>N<sub>4</sub>O<sub>3</sub>S (M+H)<sup>+</sup>: 387.0733; Found: 387.0735.

**General synthesis procedure of compounds 37-43.** A mixture of compound **A** (0.3 mmol) and corresponding ketones (0.4 mmol) in Ti(OPr)<sub>4</sub> was stirred at 70 °C for 8 hours and cooled to room temperature. MeOH (5 mL) and NaCNBH<sub>3</sub> (1.6 mmol) was added to the mixture, and stirred for 5 hours at 40 °C. The mixture was quenched by 1 N NaOH (10 mL), filtered by celite, and washed by MeOH. The MeOH was evaporated under vacuo. The residue was diluted by H<sub>2</sub>O, and extracted by Et<sub>2</sub>O. The combined organic layer was washed by brine, dried over anhydrous MgSO<sub>4</sub>, filtered, and concentrated. The residue was purified over silica gel column (DCM : MeOH = 30 : 1) to yield oils **B37-B43** (yield, 30-55%).

To a stirred solution of **B37-B43** in DCM (5 mL) was added TFA (1 mL) at room temperature. The mixture was stirred for 2 hours and concentrated to afford the crude product **C37-C43** which was used directly in the next step without further purification. To a stirred solution of above crude **C37-C43** in anhydrous MeOH (10 mL) was added BTZ core compound **D** (0.3 mmol) and Et<sub>3</sub>N (0.6 mmol) at room temperature. The mixture was stirred overnight at 40 °C, and concentrated. The residue was purified by column chromatography over silica gel (DCM : MeOH = 20 : 1) to yield the yellow solids, which were further treated by n-hexane to give **37-43**. (The data and NMR copies of compounds **37-43** were listed in the supporting information.)



**8-nitro-6-(trifluoromethyl)-2-(5-(4-(trifluoromethyl)phenyl) hexahydropyrrolo[3,4-c]pyrrol-2(1H)-yl)-4H-benzo[e][1,3]thiazin-4-one (37).** According to above general procedure, employing 1-(4-(trifluoromethyl)phenyl)ethan-1-one afforded compound **37** as a yellow solid, mp: 169-170 °C; <sup>1</sup>H NMR (500 Mz, CDCl<sub>3</sub>) δ 9.16 (s, 1H), 8.77 (s, 1H), 7.55-7.54 (m, 2H), 7.41-7.39 (m, 2H), 4.24-4.14 (m, 1H), 4.02-3.92 (m, 1.5H), 3.82-3.78 (m, 0.5 H), 3.73-3.66 (m, 0.5 H), 3.53-3.49 (m, 0.5 H), 3.31 (t, J = 6.5 Hz, 1H), 3.12 (brs, 0.5 H), 3.06 (brs, 0.5H), 2.99 (brs, 0.5 H), 2.92 (brs, 0.5 H), 2.87 (d, J = 9.5 Hz, 1H), 2.60-2.53 (m, 1H), 2.49-2.42 (m, 2H), 1.35 (d, J = 6.0 Hz, 3H); <sup>13</sup>C NMR (100 MHz, CDCl<sub>3</sub>) δ 166.08, 159.98, 149.28 (d, J = 16.83 Hz), 143.71, 134.66, 133.88, 129.69 (q, J = 35.2 Hz), 129.56 (q, J = 32.1 Hz), 127.29, 126.94, 126.02 (q, J = 3.0 Hz), 125.64 (q, J = 3.0 Hz), 123.91, 122.44 (q, J = 271.0 Hz), 64.24, 58.84, 58.35 (d, J = 8.10 Hz), 56.53 (d, J = 33.49 Hz), 53.59 (d, J = 22.59 Hz), 41.76, 39.90, 23.23; ESI-MS: 559 (M + H)<sup>+</sup>; HRMS-ESI (m/z): Calcd. For C<sub>24</sub>H<sub>21</sub>F<sub>6</sub>N<sub>4</sub>O<sub>3</sub>S (M+H)<sup>+</sup>: 559.1233; Found: 559.1236.

**8-nitro-2-(5-(4-(trifluoromethoxy)phenyl)hexahydropyrrolo[3,4-c]pyrrol-2(1H)-yl)-6-(trifluoromethyl)-4H-benzo[e][1,3]thiazin-4-one (38).** According to above general procedure, employing 1-(4-(trifluoromethoxy)phenyl)ethan-1-one afforded compound **38** as a yellow solid. mp: 150-151 °C; <sup>1</sup>H NMR (500 Mz, CDCl<sub>3</sub>) δ 9.18 (s, 1H), 8.78 (s, 1H), 7.30 (brs, 2H), 7.15 (brs, 2H), 4.24-4.15 (m, 1H), 4.02-3.94 (m, 1.5H), 3.82-3.79 (m, 0.5 H), 3.68-3.66 (m, 0.5 H), 3.52 (brs, 0.5 H), 3.26 (brs, 1H), 3.12 (brs, 0.5 H), 3.06 (brs, 0.5H), 2.99 (brs, 0.5 H), 2.93 (brs, 0.5 H), 2.85 (d, J = 9.5 Hz, 1H), 2.58-2.54 (m, 1H), 2.48-2.45 (m, 2H), 1.33 (d, J = 4.2 Hz, 3H); <sup>13</sup>C NMR (100 MHz, CDCl<sub>3</sub>) δ 166.09, 159.99, 148.29, 143.97, 143.84, 143.73, 134.69, 133.93, 129.78 (q, J = 35.0 Hz), 128.25, 126.99, 126.04 (q, J = 3.0 Hz), 122.50 (q, J = 255.3 Hz), 121.17, 120.60 (q, J = 255.3 Hz), 63.89, 58.63, 56.60, 53.64, 41.78, 39.95, 23.34; ESI-MS: 575 (M + H)<sup>+</sup>; HRMS-ESI (m/z): Calcd. For C<sub>24</sub>H<sub>21</sub>F<sub>6</sub>N<sub>4</sub>O<sub>4</sub>S (M+H)<sup>+</sup>: 575.1182; Found: 575.1185.

**2-(5-(3,4-difluorophenyl)hexahydropyrrolo[3,4-c]pyrrol-2(1H)-yl)-8-nitro-6-(trifluoromethyl)-4H-benzo[e][1,3]thiazin-4-one (39).** According to above general procedure, employing 1-(3,4-difluorophenyl)ethan-1-one afforded compound **39** as a yellow solid. mp: 75-80 °C; <sup>1</sup>H NMR (500 Mz, CDCl<sub>3</sub>) δ 9.17 (s, 1H), 8.78 (s, 1H), 8.77-7.06 (m, 2H), 6.99 (brs, 1H), 4.22-4.16 (m, 1H), 4.02-3.92 (m, 1.5H), 3.82-3.80 (d,

$J=11.78\text{Hz}$ , 0.5H), 3.74 (s, 0.5H), 3.73 (s, 0.5H), 3.71 (s, 0.5H), 3.70 (s, 0.5H), 3.66-3.65 (d,  $J=7.64\text{Hz}$ , 0.5H), 3.53-3.52 (d,  $J=7.48\text{Hz}$ , 0.5H), 3.22 (brs, 1H), 3.11 (brs, 0.5H), 3.06 (brs, 1H), 2.98 (brs, 1H), 2.93 (brs, 1H), 2.83-2.82 (d,  $J=8.67\text{Hz}$ , 1H), 2.58-2.54 (m, 1H), 2.46 (brs, 1H), 1.32 (brs, 3H);  $^{13}\text{C}$  NMR (100 MHz,  $\text{CDCl}_3$ )  $\delta$  143.77, 133.93, 126.05, 122.71, 117.37, 63.61, 58.82, 58.63, 58.17, 56.64, 53.64, 53.52, 41.74, 39.94, 23.20, 18.59; ESI-MS: 527 (M + H)<sup>+</sup>; HRMS-ESI (m/z): Calcd. For  $\text{C}_{23}\text{H}_{20}\text{F}_5\text{N}_4\text{O}_3\text{S}$  (M+H)<sup>+</sup>: 527.1171; Found: 527.1173.

**2-(5-(4-chloro-3-fluorophenyl)hexahydropyrrolo[3,4-c]pyrrol-2(1H)-yl)-8-nitro-6-(trifluoromethyl)-4H-benzo[e][1,3]thiazin-4-one (40).** According to above general procedure, employing 1-(4-chloro-3-fluorophenyl)ethan-1-one afforded compound **40** as a yellow solid. mp: 138-139 °C;  $^1\text{H}$  NMR (500 Mz,  $\text{CDCl}_3$ ):  $\delta$  9.18 (s, 1H), 8.78 (s, 1H), 7.31 (t,  $J = 8.0$  Hz, 1H), 7.09 (t,  $J = 7.5$  Hz, 1H), 7.02 (d,  $J = 8.0$  Hz, 1H), 4.23-4.16 (m, 1H), 4.02-3.92 (m, 1.5H), 3.82-3.80 (m, 0.5 H), 3.66-3.65 (m, 0.5 H), 3.53-3.52 (m, 0.5 H), 3.24 (brs, 1H), 3.12 (brs, 0.5 H), 3.06 (brs, 0.5H), 2.98 (brs, 0.5 H), 2.95 (brs, 0.5 H), 2.83 (brs, 1H), 2.60-2.45 (m, 3H), 1.32 (d,  $J = 5.5$  Hz, 3H);  $^{13}\text{C}$  NMR (100 MHz,  $\text{CDCl}_3$ )  $\delta$  166.13, 160.04, 159.56, 157.09, 146.47, 146.41, 146.26, 146.21, 143.73, 134.66, 133.92, 130.74, 129.97 (q,  $J = 70.75\text{Hz}$ ), 129.61 (q,  $J=70.75\text{Hz}$ ), 126.97, 126.62, 126.03 (q,  $J = 3.50\text{Hz}$ ), 123.90 (q,  $J=275.61\text{Hz}$ ), 123.29 (q,  $J=273.07\text{Hz}$ ), 119.36, 118.48, 115.17, 114.93, 63.65, 58.85, 58.75, 58.28, 58.16, 56.65, 56.33, 53.63, 53.51, 51.04, 41.73, 39.92, 29.84, 23.16; ESI-MS: 543 (M + H)<sup>+</sup>; HRMS-ESI (m/z): Calcd. For  $\text{C}_{23}\text{H}_{19}\text{ClF}_4\text{N}_4\text{O}_3\text{S}$  (M+H)<sup>+</sup>: 543.0875; Found: 543.0877.

**2-(5-(3-chloro-4-fluorophenyl)hexahydropyrrolo[3,4-c]pyrrol-2(1H)-yl)-8-nitro-6-(trifluoromethyl)-4H-benzo[e][1,3]thiazin-4-one (41).** According to above general procedure, employing 1-(3-chloro-4-fluorophenyl)ethan-1-one afforded compound **41** as a yellow solid. mp: 168-169 °C;  $^1\text{H}$  NMR (500 Mz,  $\text{CDCl}_3$ ):  $\delta$  9.17 (s, 1H), 8.78 (s, 1H), 7.31 (t,  $J = 5.9$  Hz, 1H), 7.14 (brs, 1H), 7.08-7.05 (m, 1H), 4.21-4.15 (m, 1H), 4.01-3.91 (m, 1.5H), 3.82-3.80 (m, 0.5 H), 3.66-3.64 (m, 0.5 H), 3.53 (brs, 0.5 H), 3.22 (brs, 1H), 3.11 (brs, 0.5 H), 3.06 (brs, 0.5H), 2.98 (brs, 0.5 H), 2.93 (brs, 0.5 H), 2.81 (d,  $J = 6.5$  Hz, 1H), 2.59-2.51 (m, 1H), 2.48-2.46 (m, 2H), 1.32 (brs, 3H);  $^{13}\text{C}$  NMR (100 MHz,  $\text{CDCl}_3$ )  $\delta$  143.87, 134.04, 129.15, 126.16, 63.59, 58.74, 53.63, 40.06, 18.69; ESI-MS: 543 (M + H)<sup>+</sup>; HRMS-ESI (m/z): Calcd. For  $\text{C}_{23}\text{H}_{19}\text{ClF}_4\text{N}_4\text{O}_3\text{S}$  (M+H)<sup>+</sup>: 543.0875; Found: 543.0877.

**2-(5-(3,5-difluorophenyl)hexahydropyrrolo[3,4-c]pyrrol-2(1H)-yl)-8-nitro-6-(trifluoromethyl)-4H-benzo[e][1,3]thiazin-4-one (42).** According to above general procedure, employing 1-(3,5-difluorophenyl)ethan-1-one afforded compound **42** as a yellow solid. mp: 168-169 °C; <sup>1</sup>H NMR (500 Mz, CDCl<sub>3</sub>): δ 9.16 (s,1H), 8.79 (s, 1H), 7.38 (brs, 1H), 6.84 (t, = 8.6 Hz,1H), 6.75 (t, = 10.0 Hz,1H), 4.22-4.14 (m, 1H), 4.02-3.95 (m, 1.5H), 3.82-3.79 (m, 0.5 H), 3.71-3.64 (m, 1.5 H), 3.53-3.49 (m, 0.5 H), 3.11 (brs, 0.5 H), 3.05 (brs, 0.5H), 2.98 (brs, 0.5 H), 2.92 (brs, 0.5 H), 2.87-2.82 (m, 1H), 2.60-2.44 (m, 3H), 1.32 (brs, 3H); <sup>13</sup>C NMR (150 MHz, CDCl<sub>3</sub>) δ 166.0, 160.0, 143.7, 129.7 (q, *J* = 36.0 Hz), 129.33 (t, *J* = 7.5 Hz), 127.00, 126.0 (q, *J* = 3.0 Hz), 122.5 (q, *J* = 271.5 Hz), 111.7 (d, *J* = 22.5 Hz), 103.7 (t, *J* = 27.0 Hz), 60.51, 58.33, 58.22, 56.68, 56.46, 55.31, 53.80, 53.52, 41.70, 39.91, 22.06, 21.17, 14.32; ESI-MS: 527 (M + H)<sup>+</sup>; HRMS-ESI (m/z): Calcd. For C<sub>23</sub>H<sub>20</sub>F<sub>5</sub>N<sub>4</sub>O<sub>3</sub>S (M+H)<sup>+</sup>: 527.1171; Found: 527.1173.

**8-nitro-6-(trifluoromethyl)-2-(5-(3,4,5-trifluorophenyl)hexahydropyrrolo[3,4-c]pyrrol-2(1H)-yl)-4H-benzo[e][1,3]thiazin-4-one (43).** According to above general procedure, employing 1-(3,4,5-trifluorophenyl)ethan-1-one afforded compound **43** as a yellow solid. mp: 158-161 °C; <sup>1</sup>H NMR (500 Mz, CDCl<sub>3</sub>): δ 9.16 (s,1H), 8.77 (s, 1H), 6.92 (brs, 2H), 4.22-4.15 (m, 1H), 4.02-3.92 (m, 1.5H), 3.84-3.80 (m, 0.5 H), 3.67-3.63 (m, 0.5 H), 3.55-3.53 (m, 0.5 H), 3.20 (brs, 1H), 3.13 (brs, 0.5H), 3.08 (brs, 0.5 H), 2.99 (brs, 1H), 2.82 (brs, 1H), 2.59-2.48 (m, 3H), 1.31 (brs, 3H); <sup>13</sup>C NMR (150 MHz, CDCl<sub>3</sub>) δ 166.07, 160.11, 151.40 (ddd, *J*<sub>1</sub> = 3.6 Hz, *J*<sub>1</sub> = 9.9 Hz, *J*<sub>1</sub> = 248.8 Hz ), 143.75, 134.60, 133.89, 129.81 (q, *J* = 34.5 Hz), 126.97, 126.03 (q, *J* = 3.0 Hz), 122.50 (q, *J* = 276.0 Hz), 110.73 (d, *J* = 16.5 Hz), 63.59, 60.52, 58.39 (d, *J* = 106.19 Hz), 56.35, 53.51, 41.72, 39.90, 23.12, 22.98, 21.17, 14.33; ESI-MS: 545 (M + H)<sup>+</sup>; HRMS-ESI (m/z): Calcd. For C<sub>23</sub>H<sub>19</sub>F<sub>6</sub>N<sub>4</sub>O<sub>3</sub>S (M+H)<sup>+</sup>: 545.1077; Found: 545.1080.

**NMR copies of target compounds.**

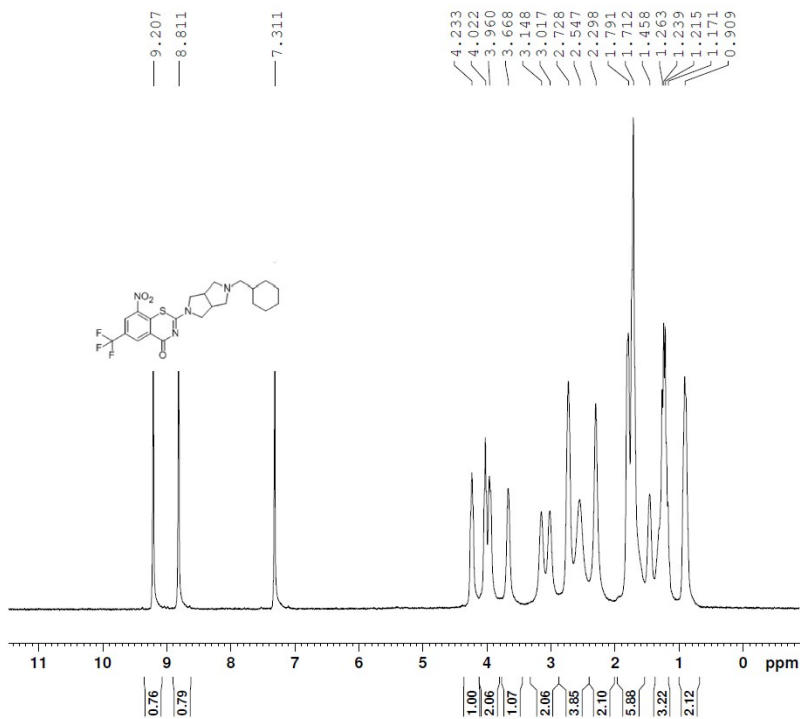

Current Data Parameters  
 NAME tzy-2-15  
 EXPNO 1  
 PROCNO 1

F2 - Acquisition Parameters  
 Date\_ 20170407  
 Time 15.14  
 INSTRUM WNMRI-500MHz  
 PULPROG zgpg30  
 TD 48000  
 SOLVENT CDCl3  
 NS 16  
 DS 0  
 SWH 12000.000 Hz  
 AQ 2.0000000 sec  
 RG 59.4  
 DW 41.667 usec  
 DE 30.00 usec  
 TE 298.3 K  
 NUC1 1H  
 PL1 120.00 dB  
 SFO1 499.7053818 MHz

F2 - Processing parameters  
 SI 32768  
 SF 499.7017639 MHz  
 WDW EM  
 SSB 0  
 LB 1.00 Hz  
 GB 0.1  
 PC 1.00

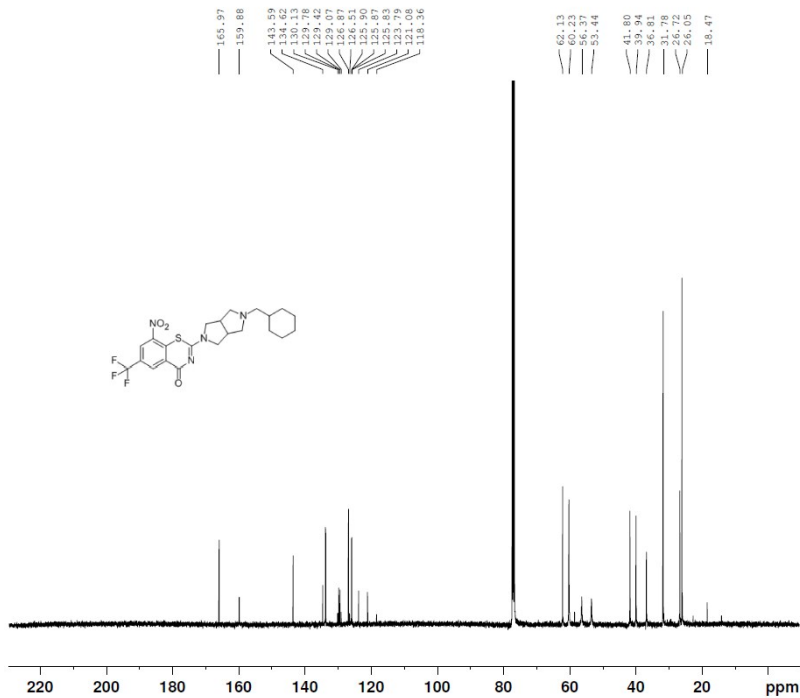

Current Data Parameters  
 NAME 20170411 tzy-2-15  
 EXPNO 1  
 PROCNO 1

F2 - Acquisition Parameters  
 Date\_ 20170412  
 Time 23.28  
 INSTRUM spect  
 PROBHID 5 mm CPPBBO HB  
 PULPROG zgpg30  
 TD 32768  
 SOLVENT CDCl3  
 NS 4800  
 DS 4  
 SWH 24038.461 Hz  
 FIDRES 0.733596 Hz  
 AQ 0.6815744 sec  
 RG 77.6  
 DW 20.800 usec  
 DE 18.00 usec  
 TE 298.0 K  
 D1 1.00000000 sec  
 D11 0.03000000 sec  
 TDO 600

===== CHANNEL f1 =====  
 SFO1 100.6238345 MHz  
 NUC1 13C  
 P1 9.84 usec  
 PLW1 38.00000000 W

===== CHANNEL f2 =====  
 SFO2 400.1316005 MHz  
 NUC2 1H  
 CPDPRG2 waltz16  
 PCPD2 80.00 usec  
 PLW2 8.14700031 W  
 PLW12 0.15600000 W  
 PLW13 0.09983800 W

F2 - Processing parameters  
 SI 32768  
 SF 100.6127690 MHz  
 WDW EM  
 SSB 0  
 LB 1.00 Hz  
 GB 0  
 PC 1.40

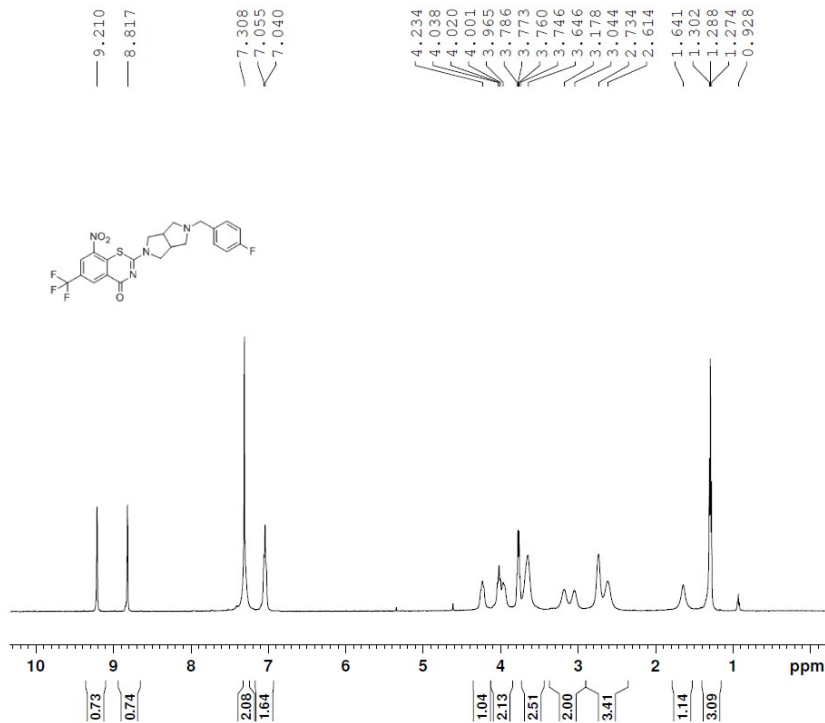

Current Data Parameters  
NAME tzy-2-5  
EXPNO 1  
PROCNO 1

F2 - Acquisition Parameters  
Date\_ 20170405  
Time 9.02  
INSTRUM WNMRI-500MHz  
PULPROG sipul  
TD 48000  
SOLVENT CDCl3  
NS 16  
DS 0  
SWH 12000.000 Hz  
AQ 2.000000 sec  
RG 63.3  
DW 41.667 usec  
DE 30.00 usec  
TE 298.1 K  
NUC1 1H  
PL1 120.00 dB  
SFO1 499.7053818 MHz

F2 - Processing parameters  
SI 32768  
SF 499.7017639 MHz  
WDW EM  
SSB 0  
LB 1.00 Hz  
GB 0.1  
PC 1.00

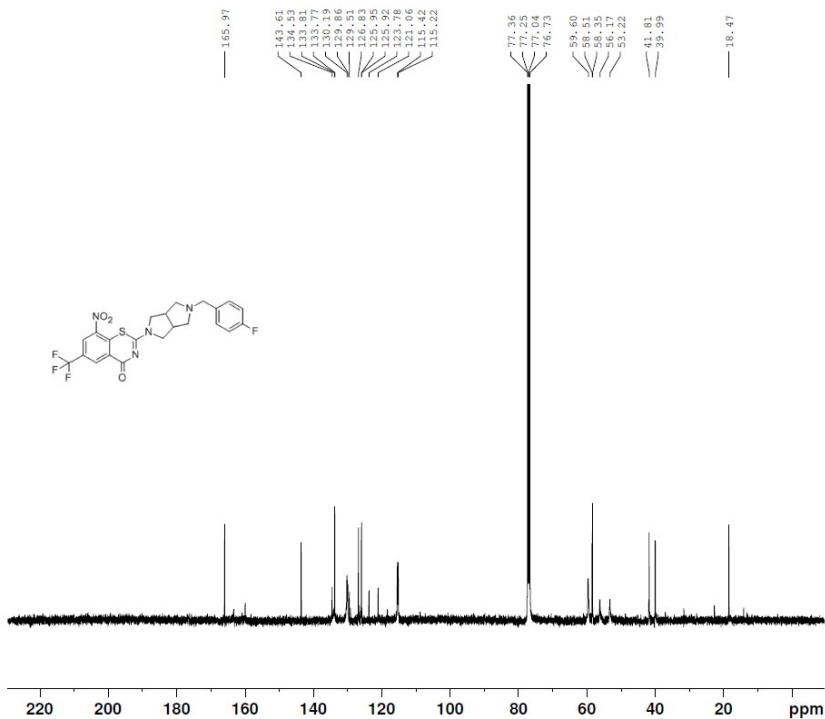

Current Data Parameters  
NAME 20170407 tzy-2-5  
EXPNO 2  
PROCNO 1

F2 - Acquisition Parameters  
Date\_ 20170410  
Time 2.49  
INSTRUM spect  
PROBHD 5 mm CPPBBO BB  
PULPROG zgpg30  
TD 32768  
SOLVENT CDCl3  
NS 4000  
DS 4  
SWH 24038.461 Hz  
FIDRES 0.733596 Hz  
AQ 0.6815744 sec  
RG 77.6  
DW 20.800 usec  
DE 18.00 usec  
TE 298.1 K  
D1 1.00000000 sec  
D11 0.03000000 sec  
TD0 500

===== CHANNEL f1 =====  
SFO1 100.6238345 MHz  
NUC1 13C  
P1 9.84 usec  
PLW1 38.00000000 W  
===== CHANNEL f2 =====  
SFO2 400.1316005 MHz  
NUC2 1H  
PCPD2 waltz16  
PCPD2 80.00 usec  
PLW2 8.14700031 W  
PLW12 0.15600000 W  
PLW13 0.09983800 W

F2 - Processing parameters  
SI 32768  
SF 100.6127690 MHz  
WDW EM  
SSB 0  
LB 1.00 Hz  
GB 0  
PC 1.40

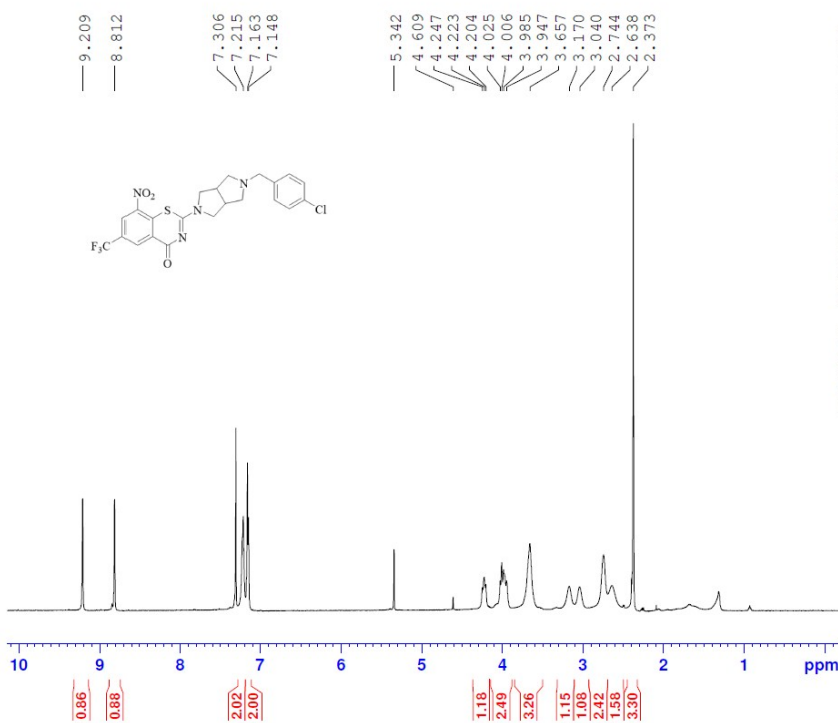

Current Data Parameters  
 NAME lq-2-53 0509  
 EXPNO 1  
 PROCNO 1

F2 - Acquisition Parameters  
 Date\_ 20170508  
 Time 15.15  
 INSTRUM WNMRI-500MHz  
 PULPROG sipul  
 TD 48000  
 SOLVENT cdcl3  
 NS 10  
 DS 0  
 SWH 12000.000 Hz  
 AQ 2.0000000 sec  
 RG 65.6  
 DW 41.667 usec  
 DE 30.00 usec  
 TE 298.4 K  
 NUC1 1H  
 PL1 120.00 dB  
 SFO1 499.7053818 MHz

F2 - Processing parameters  
 SI 32768  
 SF 499.7017639 MHz  
 WDW EM  
 SSB 0  
 LB 1.00 Hz  
 GB 0.1  
 PC 1.00

Bruker AVANCEIII 400 20170515  
 C13 CDCl3 D:\DATA-2017 41

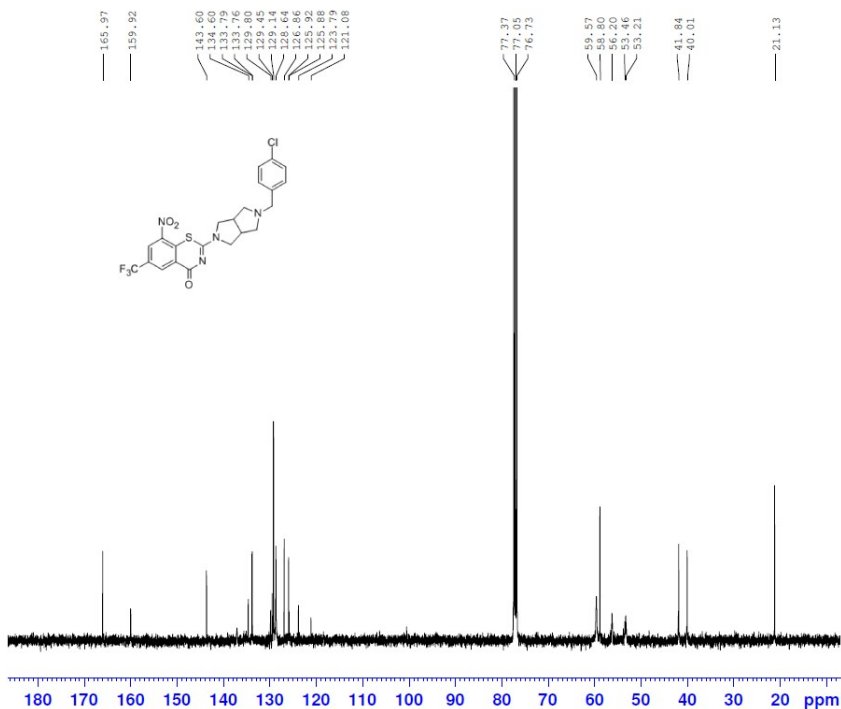

Current Data Parameters  
 NAME 20170515 lq-2-53  
 EXPNO 1  
 PROCNO 1

F2 - Acquisition Parameters  
 Date\_ 20170515  
 Time 15.51  
 INSTRUM spect  
 PROBD 5 mm CPPBBO BB  
 PULPROG zgpg30  
 TD 32768  
 SOLVENT CDCl3  
 NS 4000  
 DS 4  
 SWH 24038.461 Hz  
 FIDRES 0.733596 Hz  
 AQ 0.6815744 sec  
 RG 77.6  
 DW 20.800 usec  
 DE 18.00 usec  
 TE 298.0 K  
 D1 1.00000000 sec  
 D11 0.03000000 sec  
 TDO 500

===== CHANNEL f1 =====  
 SFO1 100.6238345 MHz  
 NUC1 13C  
 P1 9.84 usec  
 PLW1 38.00000000 W

===== CHANNEL f2 =====  
 SFO2 400.1316005 MHz  
 NUC2 1H  
 CPDPRG2 waltz16  
 PCPD2 80.00 usec  
 PLW2 8.14700031 W  
 PLW12 0.15600000 W  
 PLW13 0.09983800 W

F2 - Processing parameters  
 SI 32768  
 SF 100.6127690 MHz  
 WDW EM  
 SSB 0  
 LB 1.00 Hz  
 GB 0  
 PC 1.40

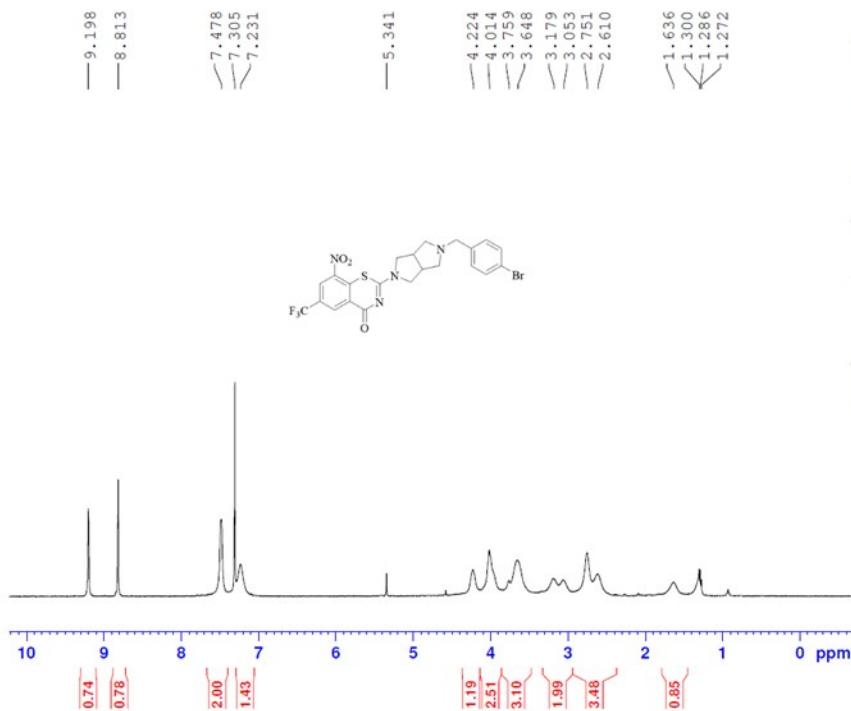

Current Data Parameters  
 NAME lq-2-61 0511  
 EXPNO 1  
 PROCNO 1

F2 - Acquisition Parameters  
 Date\_ 20170511  
 Time 14.02  
 INSTRUM WNMN-I-500MHz  
 PULPROG zgpg30  
 ID 48000  
 SOLVENT CDCl3  
 NS 9  
 DS 0  
 SWH 12000.000 Hz  
 AQ 2.0000000 sec  
 RG 62.7  
 DW 41.667 usec  
 DE 30.00 usec  
 TE 298.1 K  
 NUC1 1H  
 PL1 120.00 dB  
 SFO1 499.7053818 MHz

F2 - Processing parameters  
 SI 32768  
 SF 499.7017639 MHz  
 WDW EM  
 SSB 0  
 LB 1.00 Hz  
 GB 0.1  
 PC 1.00

Bruker AVANCEIII 400 20170524  
 C13 DMSO D:\ DATA-2017 31

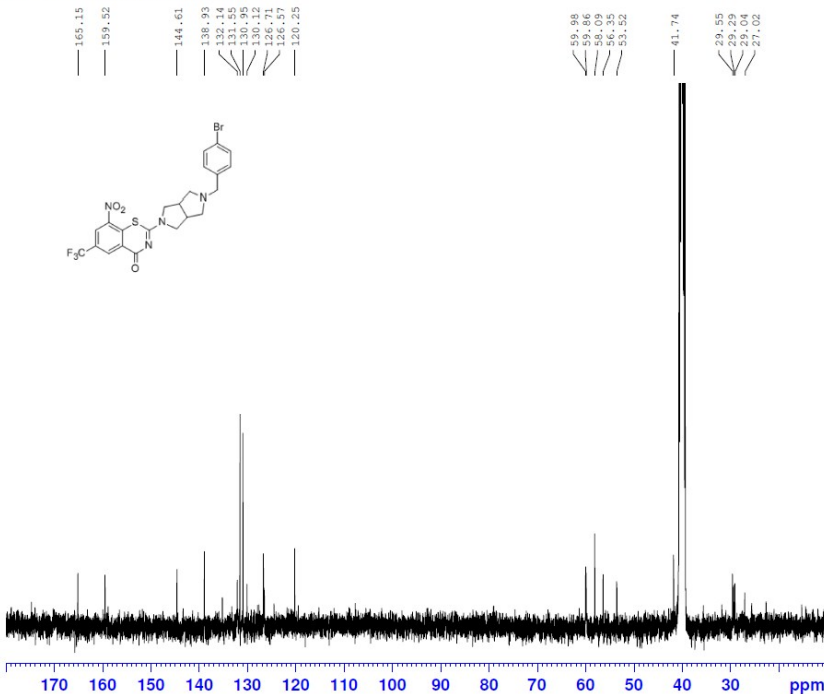

Current Data Parameters  
 NAME 20170524  
 EXPNO 1  
 PROCNO 1

F2 - Acquisition Parameters  
 Date\_ 20170524  
 Time 15.31  
 INSTRUM spect  
 PROBHD 5 mm CFPBBO BB  
 PULPROG zgpg30  
 ID 32768  
 SOLVENT DMSO  
 NS 3200  
 DS 4  
 SWH 24038.461 Hz  
 FIDRES 0.733596 Hz  
 AQ 0.6815744 sec  
 RG 77.6  
 DW 20.800 usec  
 DE 18.00 usec  
 TE 298.0 K  
 D1 1.0000000 sec  
 D11 0.0300000 sec  
 TD0 400

===== CHANNEL f1 =====  
 SFO1 100.6238345 MHz  
 NUC1 13C  
 P1 9.84 usec  
 PLW1 38.0000000 W

===== CHANNEL f2 =====  
 SFO2 400.1316005 MHz  
 NUC2 1H  
 CPDPRG[2] waltz16  
 PCPD2 80.00 usec  
 PLW2 8.1470031 W  
 PLW12 0.1560000 W  
 PLW13 0.0998380 W

F2 - Processing parameters  
 SI 32768  
 SF 100.6127690 MHz  
 WDW EM  
 SSB 0  
 LB 1.00 Hz  
 GB 0  
 PC 1.40



9.199  
8.812  
7.649  
7.635  
7.454  
7.304  
4.243  
4.053  
4.035  
4.016  
3.993  
3.958  
3.713  
3.671  
3.526  
3.187  
3.054  
2.754  
2.628  
1.660

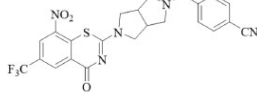

Current Data Parameters  
NAME 1q-2-55 0509  
EXPNO 1  
PROCNO 1

F2 - Acquisition Parameters  
Date\_ 20170509  
Time 9.08  
INSTRUM WNMRI-500MHz  
PULPROG slpuls  
TD 48000  
SOLVENT CDC13  
NS 9  
DS 0  
SWH 12000.000 Hz  
AQ 2.0000000 sec  
RG 61.9  
DW 41.667 usec  
DE 30.00 usec  
TE 298.4 K  
NUC1 1H  
PL1 120.00 dB  
SFO1 499.7053818 MHz

F2 - Processing parameters  
SI 32768  
SF 499.7017639 MHz  
WDW EM  
SSB 0  
LB 1.00 Hz  
GB 0.1  
PC 1.00

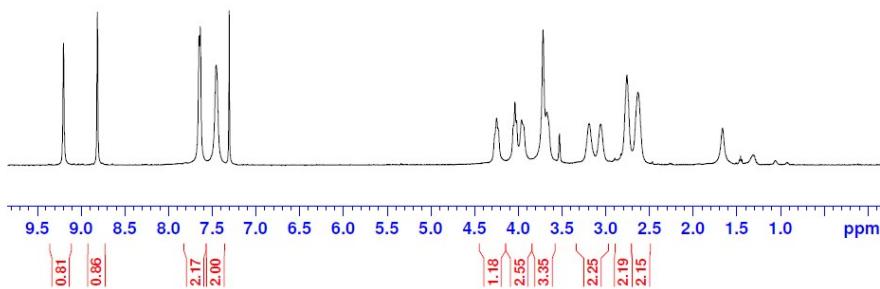

Bruker AVANCEIII 400 20170515  
C13 CDC13 D:\ DATA-2017 44

165.96  
159.99  
144.18  
143.60  
143.50  
138.78  
133.75  
133.72  
132.93  
132.83  
130.25  
129.89  
129.04  
126.77  
126.47  
125.95  
123.75  
121.04  
118.33  
111.17  
85.89  
84.79  
83.47  
56.22  
53.47  
51.39  
41.84  
40.04

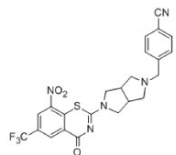

Current Data Parameters  
NAME 20170515 1q-2-55  
EXPNO 1  
PROCNO 1

F2 - Acquisition Parameters  
Date\_ 20170515  
Time 22.13  
INSTRUM spect  
PROBHD 5 mm CPPBBO BB  
PULPROG zgpg30  
TD 32768  
SOLVENT CDC13  
NS 4000  
DS 4  
SWH 24038.461 Hz  
FIDRES 0.733596 Hz  
AQ 0.6815744 sec  
RG 77.6  
DW 20.800 usec  
DE 18.00 usec  
TE 297.9 K  
D1 1.00000000 sec  
D11 0.03000000 sec  
TD0 500

===== CHANNEL f1 =====  
SFO1 100.6238345 MHz  
NUC1 13C  
P1 9.84 usec  
PLW1 38.00000000 W

===== CHANNEL f2 =====  
SFO2 400.1316005 MHz  
NUC2 1H  
PCPD2 waltz16  
PCPD2 80.00 usec  
PLW2 8.14700031 W  
PLW12 0.15600000 W  
PLW13 0.09983800 W

F2 - Processing parameters  
SI 32768  
SF 100.6127690 MHz  
WDW EM  
SSB 0  
LB 1.00 Hz  
GB 0  
PC 1.40

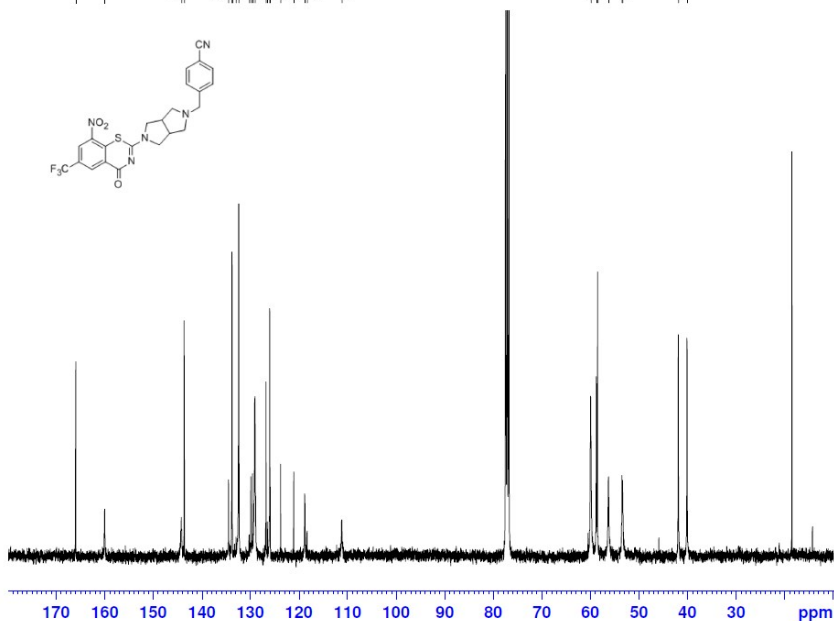

9.207  
8.819  
8.217  
8.202  
7.519  
7.508  
7.308  
5.342  
4.277  
4.254  
4.235  
4.064  
4.045  
4.027  
3.977  
3.956  
3.764  
3.680  
3.201  
3.071  
2.772  
2.657  
1.650  
1.297  
0.921

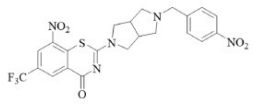

Current Data Parameters  
 NAME lq-2-54 0509  
 EXPNO 1  
 PROCNO 1  
 F2 - Acquisition Parameters  
 Date\_ 20170508  
 Time 15.12  
 INSTRUM WNMRI-500MHz  
 PULPROG spul  
 TD 48000  
 SOLVENT CDCl3  
 NS 18  
 DS 0  
 SWH 12000.000 Hz  
 AQ 2.0000000 sec  
 RG 64.8  
 DW 41.667 usec  
 DE 30.00 usec  
 TE 298.4 K  
 NUC1 H  
 PL1 120.00 dB  
 SFO1 499.7053818 MHz  
 F2 - Processing parameters  
 SI 32768  
 SF 499.7017639 MHz  
 WDW EM  
 SSB 0  
 LB 1.00 Hz  
 GB 0.1  
 PC 1.00

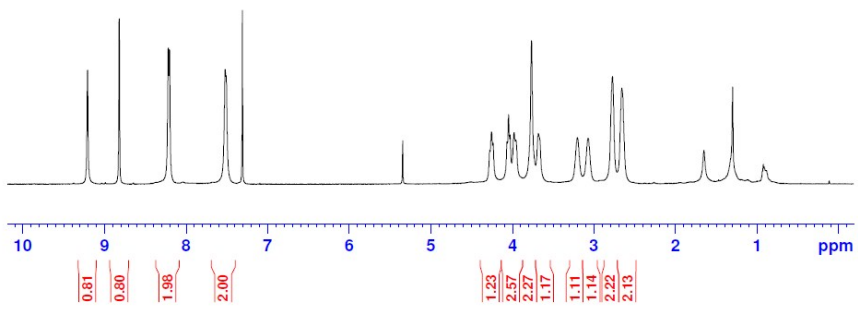

Bruker AVANCEIII 400 20170515  
 C13 CDC13 D:\ DATA-2017 42

165.95  
160.01  
147.23  
146.29  
144.46  
133.73  
133.75  
132.54  
129.54  
129.05  
126.77  
126.00  
123.78  
123.78  
123.78  
118.32  
77.37  
77.06  
76.74  
59.94  
58.44  
56.23  
53.53  
41.86  
40.05  
31.95  
29.72  
29.39  
22.72  
14.15

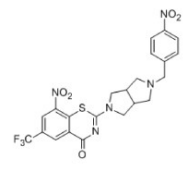

Current Data Parameters  
 NAME 20170515 lq-2-54  
 EXPNO 1  
 PROCNO 1  
 F2 - Acquisition Parameters  
 Date\_ 20170515  
 Time 20.13  
 INSTRUM spect  
 PROBHD 5 mm CPPBBO BB  
 PULPROG zgpg30  
 TD 32768  
 SOLVENT CDCl3  
 NS 4000  
 DS 4  
 SWH 24038.461 Hz  
 FIDRES 0.733596 Hz  
 AQ 0.6815744 sec  
 RG 77.6  
 DW 20.800 usec  
 DE 18.00 usec  
 TE 298.0 K  
 D1 1.00000000 sec  
 D11 0.03000000 sec  
 TDO 500  
 ===== CHANNEL f1 =====  
 SFO1 100.6238245 MHz  
 NUC1 13C  
 P1 9.84 usec  
 PLW1 38.00000000 W  
 ===== CHANNEL f2 =====  
 SFO2 400.1316005 MHz  
 NUC2 1H  
 CPDPRG2 waltz16  
 PCPD2 80.00 usec  
 PLW2 8.14700031 W  
 PLW12 0.15600000 W  
 PLW13 0.09983800 W  
 F2 - Processing parameters  
 SI 32768  
 SF 100.6127690 MHz  
 WDW EM  
 SSB 0  
 LB 1.00 Hz  
 GB 0  
 PC 1.40

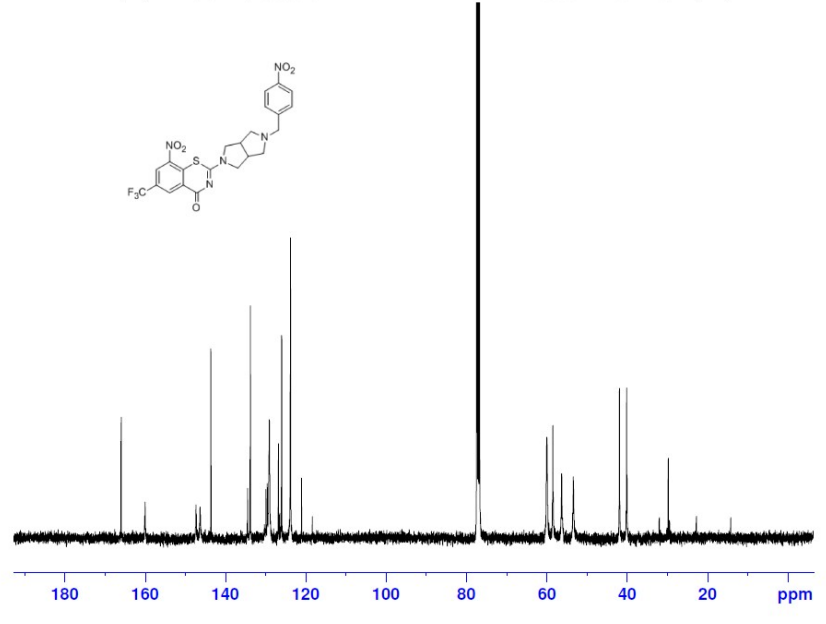

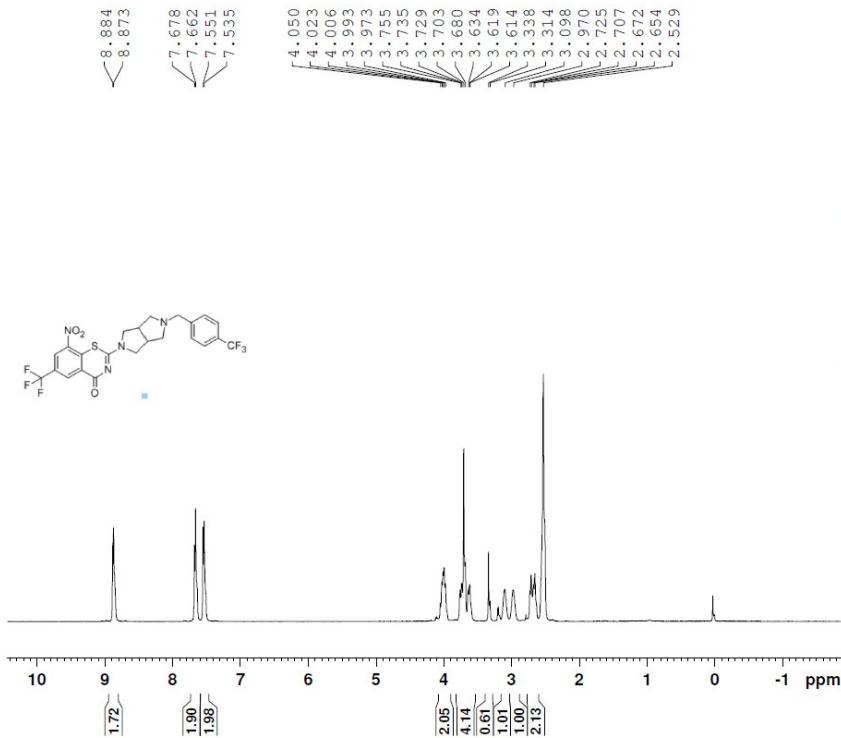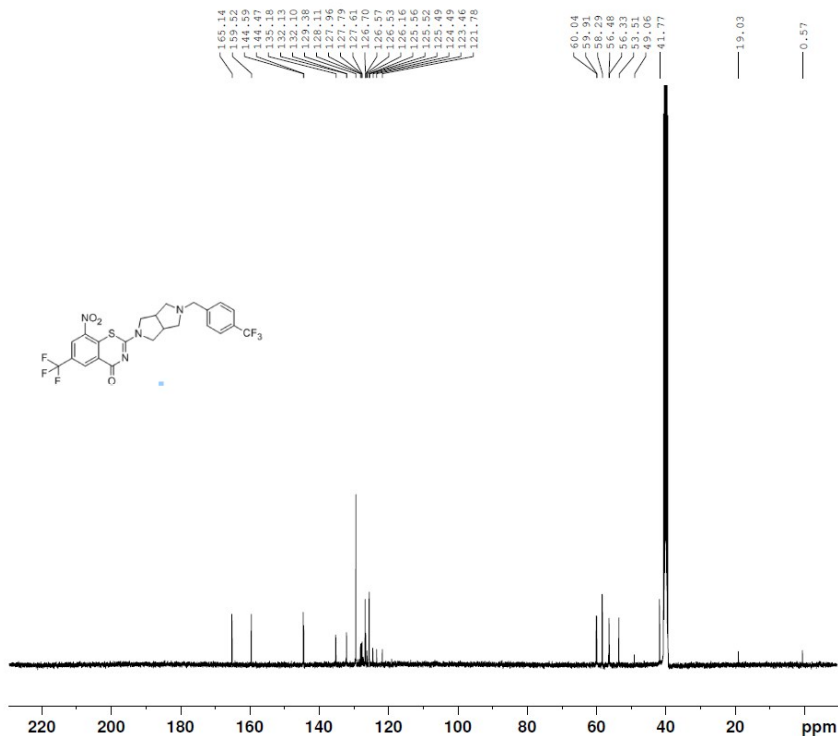

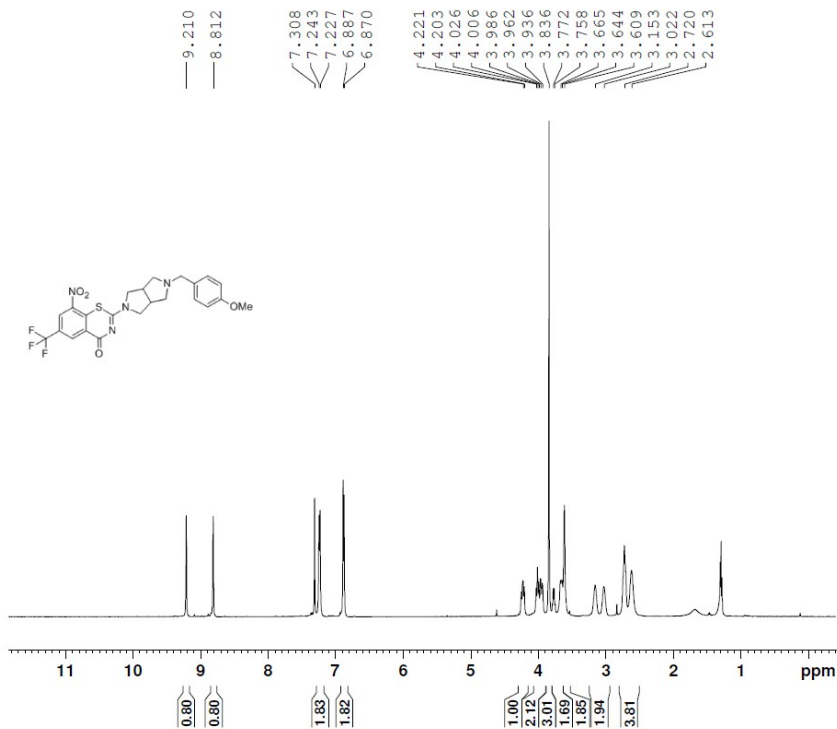

Current Data Parameters  
 NAME tzy-2-14-a  
 EXPNO 1  
 PROCNO 1

F2 - Acquisition Parameters  
 Date\_ 20170405  
 Time 9.46  
 INSTRUM WNMRI-500MHz  
 PULPROG sipul  
 TD 48000  
 SOLVENT CDCl3  
 NS 16  
 DS 0  
 SWH 12000.000 Hz  
 AQ 2.0000000 sec  
 RG 62.2  
 DW 41.667 usec  
 DE 30.00 usec  
 TE 298.0 K  
 NUC1 1H  
 PL1 120.00 dB  
 SFO1 499.7053818 MHz

F2 - Processing parameters  
 SI 32768  
 SF 499.7017639 MHz  
 WDW EM  
 SSB 0  
 LB 1.00 Hz  
 GB 0.1  
 PC 1.00

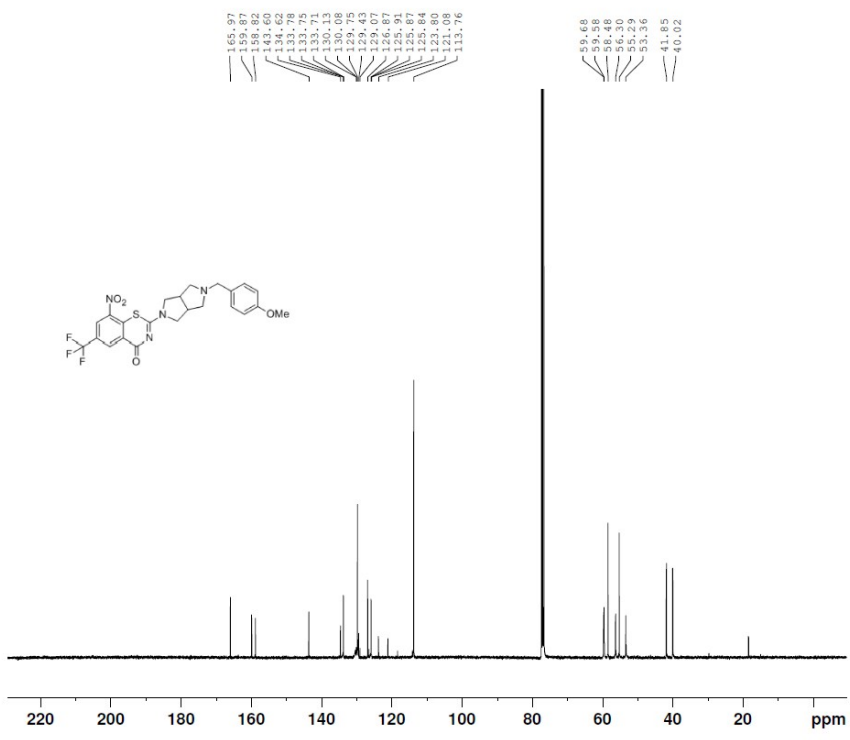

Current Data Parameters  
 NAME 20170407 tzy-2-14-a  
 EXPNO 2  
 PROCNO 1

F2 - Acquisition Parameters  
 Date\_ 20170410  
 Time 4.48  
 INSTRUM spect  
 PROBHD 5 mm CPPBBO BB  
 PULPROG zgpg30  
 TD 32768  
 SOLVENT CDCl3  
 NS 4000  
 DS 4  
 SWH 24038.461 Hz  
 FIDRES 0.733596 Hz  
 AQ 0.6815744 sec  
 RG 77.6  
 DW 20.800 usec  
 DE 18.00 usec  
 TE 298.0 K  
 D1 1.0000000 sec  
 D11 0.0300000 sec  
 TDO 500

===== CHANNEL f1 =====  
 SFO1 100.6238345 MHz  
 NUC1 13C  
 P1 9.84 usec  
 PLW1 38.0000000 W

===== CHANNEL f2 =====  
 SFO2 400.1316005 MHz  
 NUC2 1H  
 CPOPRG[2] waltz16  
 PCPD2 80.00 usec  
 PLW2 8.14700031 W  
 PLW12 0.15600000 W  
 PLW13 0.09983800 W

F2 - Processing parameters  
 SI 32768  
 SF 100.6127690 MHz  
 MDW EM  
 SSB 0  
 LB 1.00 Hz  
 GB 0  
 PC 1.40

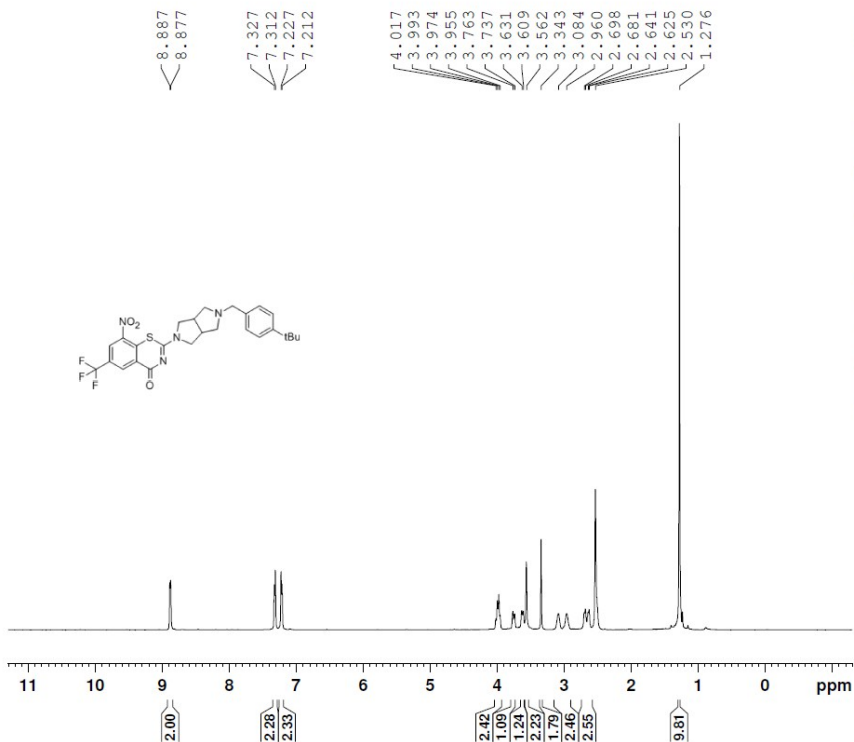

Current Data Parameters  
 NAME test1  
 EXPNO 1  
 PROCNO 1

F2 - Acquisition Parameters  
 Date\_ 20170531  
 Time 14.40  
 INSTRUM WNMRI-500MHz  
 PULPROG zgpg30  
 TD 48000  
 SOLVENT DMSO  
 NS 16  
 DS 0  
 SWH 12000.000 Hz  
 AQ 2.000000 sec  
 RG 62  
 DW 41.667 usec  
 DE 30.00 usec  
 TE 298.1 K  
 NUC1 1H  
 PL1 120.00 dB  
 SFO1 499.7053818 MHz

F2 - Processing parameters  
 SI 32768  
 SF 499.7041375 MHz  
 WDW EM  
 SSB 0  
 LB 1.00 Hz  
 GB 0.1  
 PC 1.00

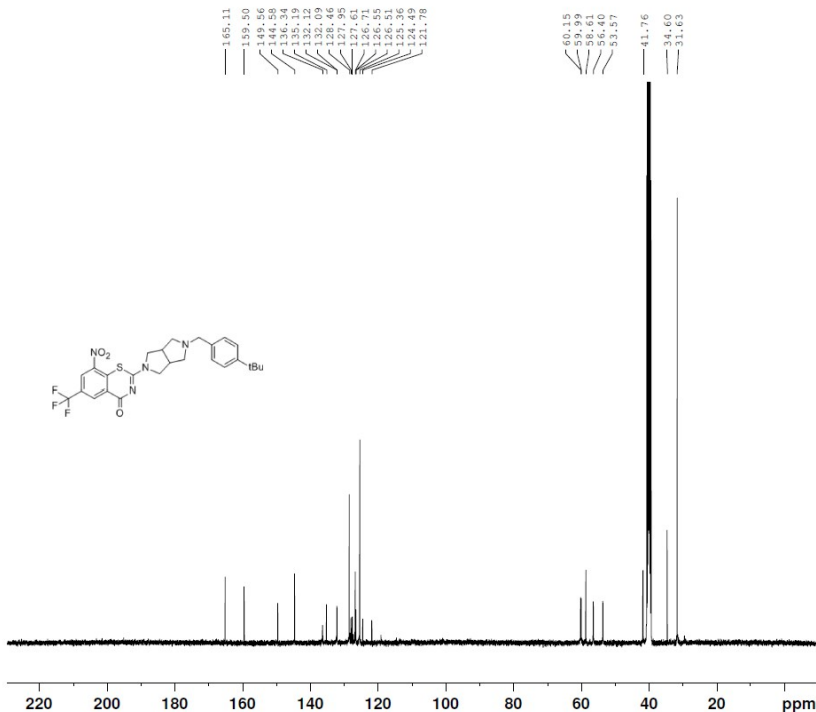

Current Data Parameters  
 NAME 20170607 test1  
 EXPNO 1  
 PROCNO 1

F2 - Acquisition Parameters  
 Date\_ 20170608  
 Time 15.03  
 INSTRUM spect  
 PROBHD 5 mm CPPBBO BB  
 PULPROG zgpg30  
 TD 32768  
 SOLVENT DMSO  
 NS 4000  
 DS 4  
 SWH 24038.461 Hz  
 FIDRES 0.733596 Hz  
 AQ 0.6815744 sec  
 RG 77.6  
 DW 20.800 usec  
 DE 18.00 usec  
 TE 298.0 K  
 D1 1.00000000 sec  
 D11 0.03000000 sec  
 TD0 500

----- CHANNEL f1 -----  
 SFO1 100.6238345 MHz  
 NUC1 13C  
 P1 9.84 usec  
 PLW1 38.00000000 W

----- CHANNEL f2 -----  
 SFO2 400.1316005 MHz  
 NUC2 1H  
 CPDPRG2 waltz16  
 PCPD2 80.00 usec  
 PLW2 8.14700031 W  
 PLW12 0.15600000 W  
 PLW13 0.09983800 W

F2 - Processing parameters  
 SI 32768  
 SF 100.6127690 MHz  
 WDW EM  
 SSB 0  
 LB 1.00 Hz  
 GB 0  
 PC 1.40

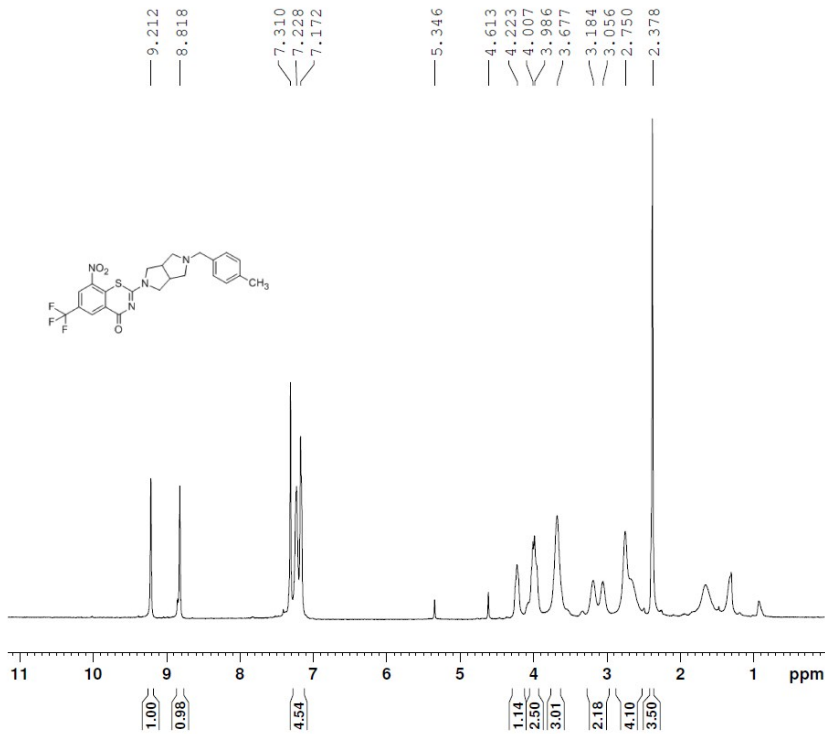

Current Data Parameters  
 NAME test8  
 EXPNO 2  
 PROCNO 1

F2 - Acquisition Parameters  
 Date\_ 20170612  
 Time 9.16  
 INSTRUM WNMRI-500MHz  
 PULPROG zipol  
 ID 48000  
 SOLVENT CDCl3  
 NS 25  
 DS 0  
 SWH 12000.000 Hz  
 AQ 2.0000000 sec  
 RG 69.5  
 DW 41.667 usec  
 DE 30.00 usec  
 TE 298.1 K  
 NUC1 1H  
 PL1 120.00 dB  
 SFO1 499.7053818 MHz

F2 - Processing parameters  
 SI 32768  
 SF 499.7017639 MHz  
 WDW EM  
 SSB 0  
 LB 1.00 Hz  
 GB 0.1  
 PC 1.00

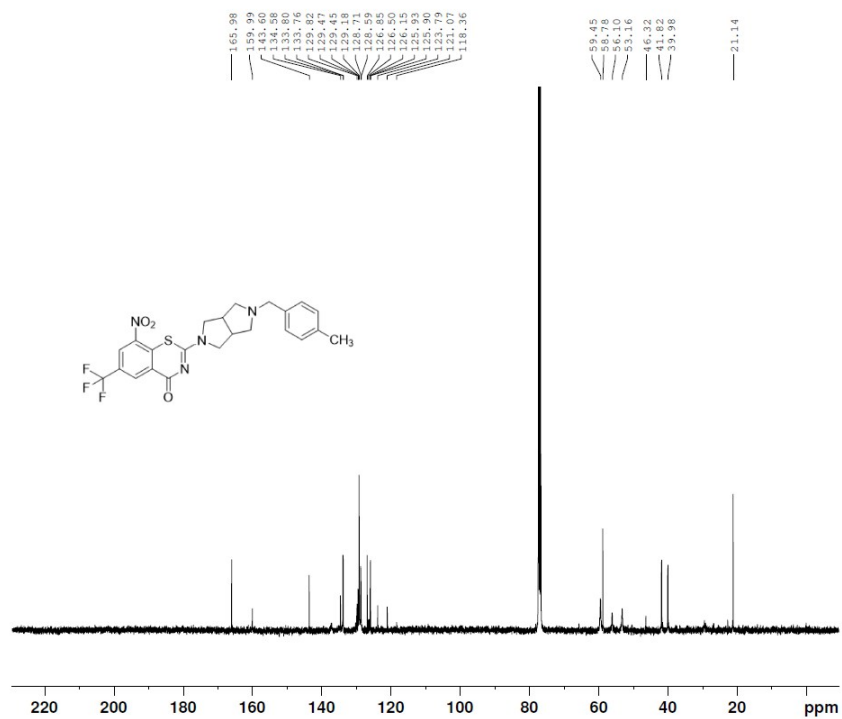

Current Data Parameters  
 NAME 20170616 test8  
 EXPNO 1  
 PROCNO 1

F2 - Acquisition Parameters  
 Date\_ 20170617  
 Time 9.10  
 INSTRUM spect  
 PROBHD 5 mm CPPBBO BB  
 PULPROG zgpg30  
 ID 32768  
 SOLVENT CDCl3  
 NS 4800  
 DS 4  
 SWH 24038.461 Hz  
 FIDRES 0.733596 Hz  
 AQ 0.6815744 sec  
 RG 77.6  
 DW 20.800 usec  
 DE 18.00 usec  
 TE 298.0 K  
 D1 1.0000000 sec  
 D11 0.0300000 sec  
 TDO 600

==== CHANNEL f1 =====  
 SFO1 100.6238345 MHz  
 NUC1 13C  
 P1 9.84 usec  
 PLW1 38.00000000 W

==== CHANNEL F2 =====  
 SFO2 400.1316005 MHz  
 NUC2 1H  
 CPDPRG[2] waltz16  
 PCPD2 80.00 usec  
 PLW2 8.14700031 W  
 PLW12 0.15600000 W  
 PLW13 0.09983800 W

F2 - Processing parameters  
 SI 32768  
 SF 100.6127690 MHz  
 WDW EM  
 SSB 0  
 LB 1.00 Hz  
 GB 0  
 PC 1.40

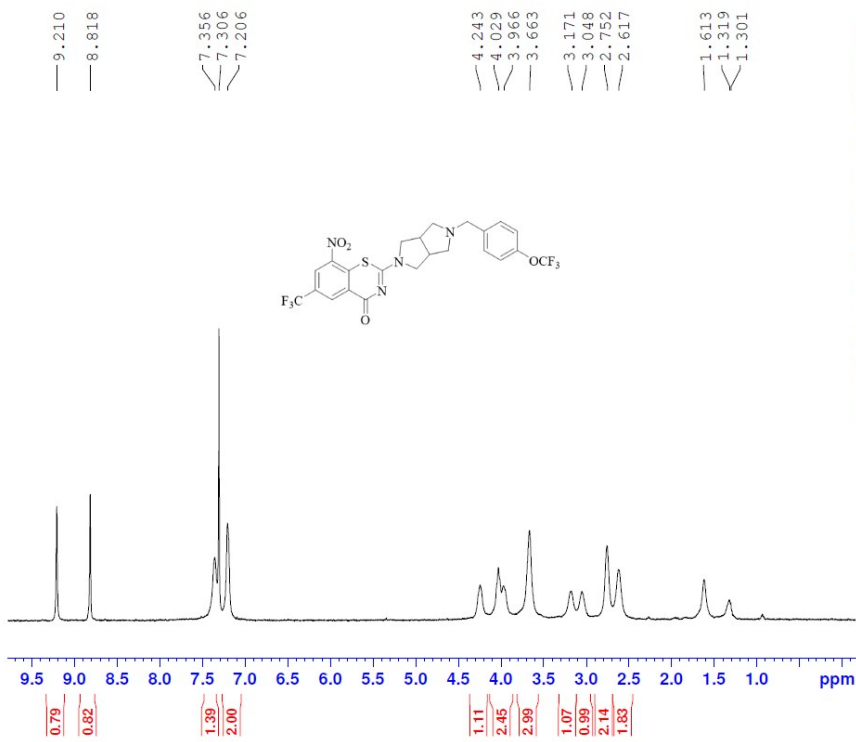

Current Data Parameters  
NAME lq-2-60 0509  
EXPNO 1  
PROCNO 1

F2 - Acquisition Parameters  
Date\_ 20170509  
Time 9.05  
INSTRUM WNMRI-500MHz  
PULPROG slpul  
TD 48000  
SOLVENT CDCl3  
NS 9  
DS 0  
SWH 12000.000 Hz  
AQ 2.0000000 sec  
RG 64.4  
DW 41.667 usec  
DE 30.00 usec  
TE 298.4 K  
NUC1 1H  
P1 120.00 dB  
SFO1 499.7053818 MHz

F2 - Processing parameters  
SI 32768  
SF 499.7017639 MHz  
WDW EM  
SSB 0  
LB 1.00 Hz  
GB 0.1  
PC 1.00

Bruker AVANCEIII 400 20170515  
C13 CDCl3 D:\DATA-2017 45

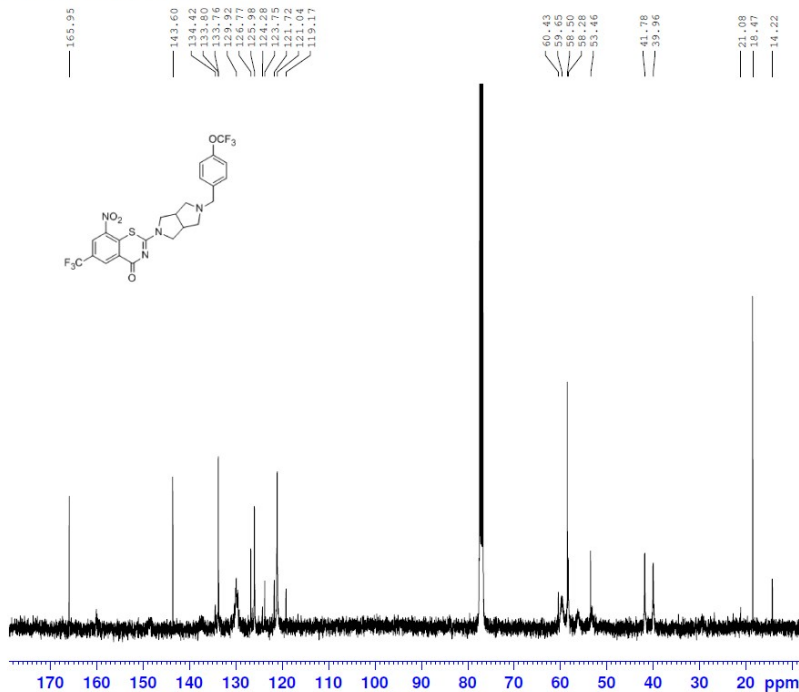

Current Data Parameters  
NAME 20170515 lq-2-60  
EXPNO 1  
PROCNO 1

F2 - Acquisition Parameters  
Date\_ 20170516  
Time 9.12  
INSTRUM spect  
PROBHD 5 mm CPPBBO BB  
PULPROG zgpg30  
TD 32768  
SOLVENT CDCl3  
NS 4000  
DS 4  
SWH 24038.461 Hz  
FIDRES 0.733596 Hz  
AQ 0.6815744 sec  
RG 77.6  
DW 20.800 usec  
DE 19.00 usec  
TE 298.1 K  
D1 1.0000000 sec  
D11 0.0300000 sec  
TD0 500

===== CHANNEL f1 =====  
SFO1 100.6238345 MHz  
NUC1 13C  
P1 9.84 usec  
PLW1 38.00000000 W

===== CHANNEL f2 =====  
SFO2 400.1316005 MHz  
NUC2 1H  
CPDPRG2 waltz16  
PCPD2 80.00 usec  
PLW2 8.14700031 W  
PLW12 0.15600000 W  
PLW13 0.09983800 W

F2 - Processing parameters  
SI 32768  
SF 100.6127690 MHz  
WDW EM  
SSB 0  
LB 1.00 Hz  
GB 0  
PC 1.40

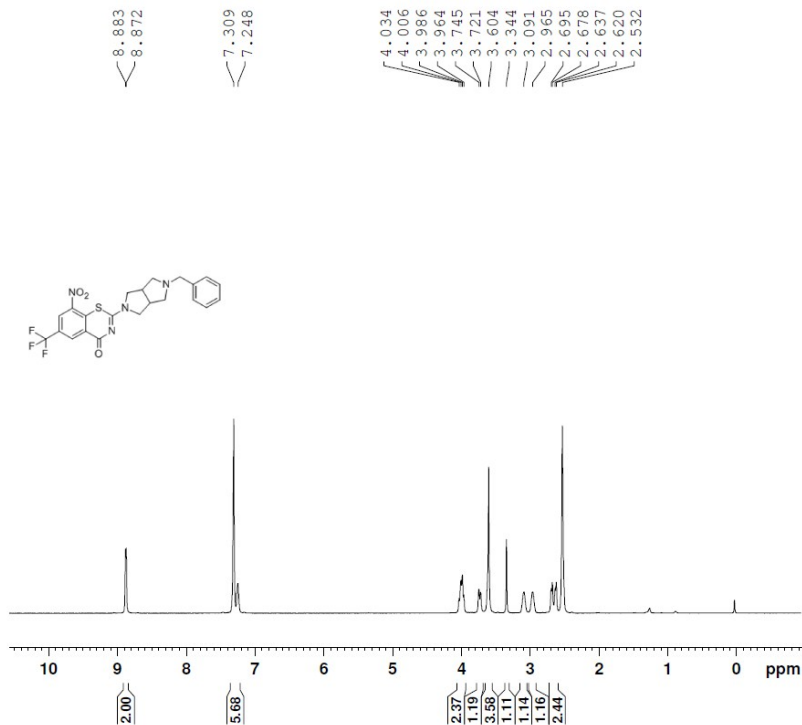

```

Current Data Parameters
NAME      tzy-3-32
EXPNO    1
PROCNO   1

F2 - Acquisition Parameters
Date_    20170526
Time     16.28
INSTRUM  WNMN-1-500MHz
PULPROG  slpul
TD       48000
SOLVENT  DMSO
NS       10
DS       0
SWH      12000.000 Hz
AQ       2.0000000 sec
RG       63.3
DW       41.667 usec
DE       30.00 usec
TE       298.1 K
NUC1     1H
P1       120.00 dB
SFO1     499.7053818 MHz

F2 - Processing parameters
SI       32768
SF       499.7041375 MHz
WDW      EM
SSB      0
LB       1.00 Hz
GB       0.1
PC       1.00
  
```

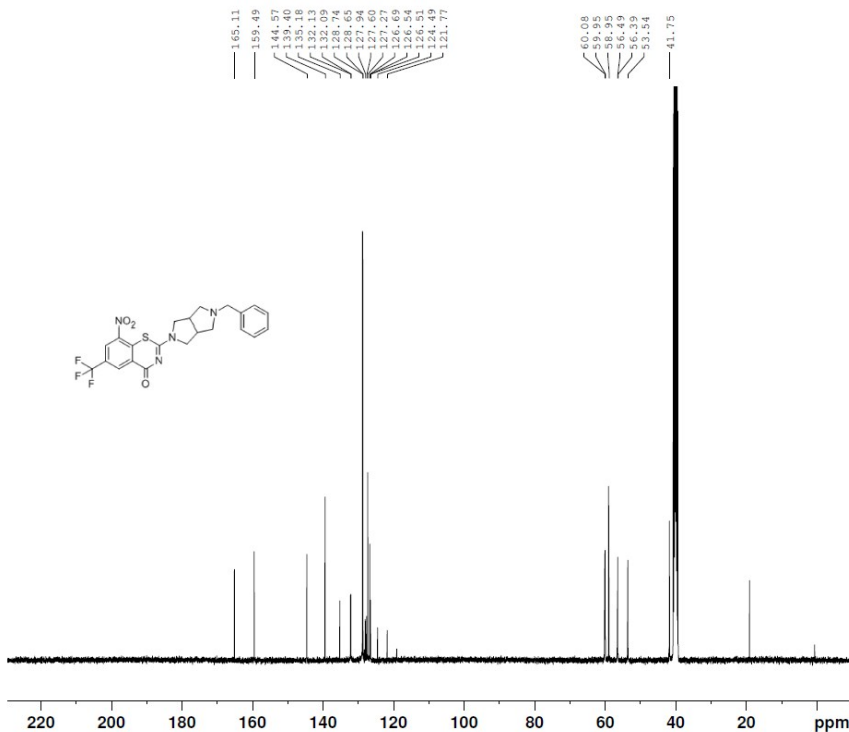

```

Current Data Parameters
NAME      TZY-3-32
EXPNO    1
PROCNO   1

F2 - Acquisition Parameters
Date_    20170609
Time     0.57
INSTRUM  spect
PROBHND  5 mm CPPBBO BB
PULPROG  zgpg30
TD       32768
SOLVENT  DMSO
NS       4000
DS       4
SWH      24038.461 Hz
FIDRES   0.733596 Hz
AQ       0.6815744 sec
RG       77.6
DW       20.800 usec
DE       18.00 usec
TE       298.0 K
D1       1.0000000 sec
D11      0.0300000 sec
TDO      500

===== CHANNEL f1 =====
SFO1     100.6238345 MHz
NUC1     13C
P1       9.84 usec
PLW1     38.00000000 W

===== CHANNEL f2 =====
SFO2     400.1316005 MHz
NUC2     1H
CPDPRG2  waltz16
PCPD2    80.00 usec
PLW2     8.14700031 W
PLW12    0.15600000 W
PLW13    0.09983800 W

F2 - Processing parameters
SI       32768
SF       100.6127690 MHz
WDW      EM
SSB      0
LB       1.00 Hz
GB       0
PC       1.40
  
```



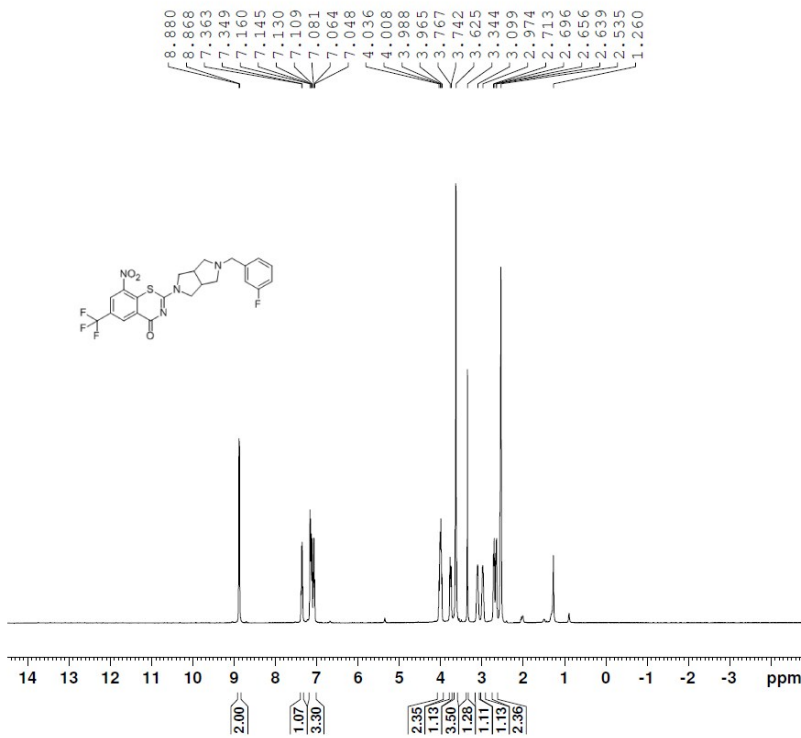

Current Data Parameters  
 NAME tzy-3-28 20170522  
 EXPNO 1  
 PROCNO 1

F2 - Acquisition Parameters  
 Date\_ 20170522  
 Time 10.24  
 INSTRUM WNMRI-500MHz  
 PULPROG slpuls  
 TD 48000  
 SOLVENT DMSO  
 NS 14  
 DS 0  
 SWH 12000.000 Hz  
 AQ 2.0000000 sec  
 RG 62.1  
 DW 41.667 usec  
 DE 30.00 usec  
 TE 298.3 K  
 NUC1 1H  
 P11 120.00 dB  
 SFO1 499.7053818 MHz

F2 - Processing parameters  
 SI 32768  
 SF 499.7041315 MHz  
 WDW EM  
 SSB 0  
 LB 1.00 Hz  
 GB 0.1  
 PC 1.00

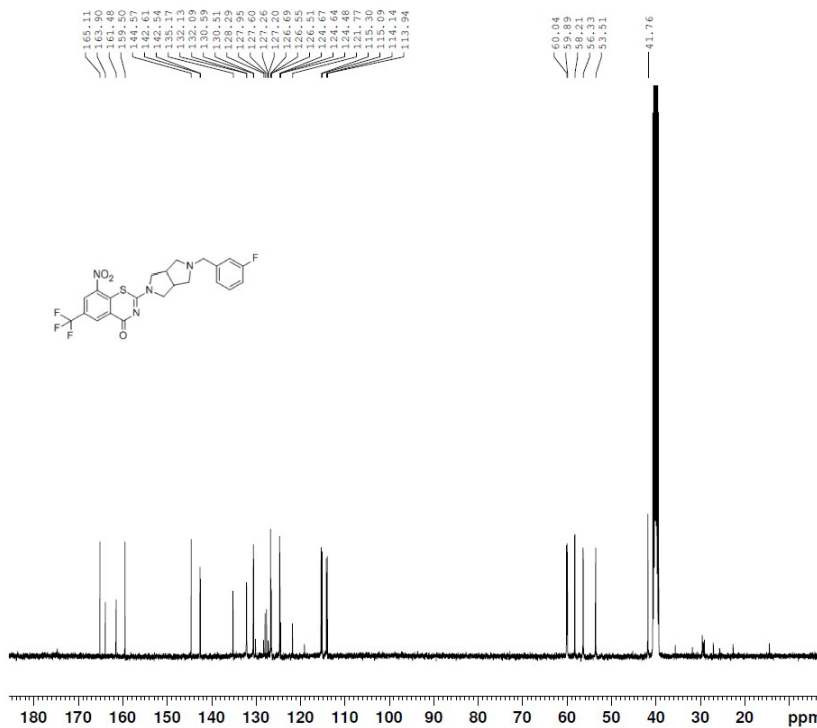

Current Data Parameters  
 NAME 20170523 TZY-3-28  
 EXPNO 1  
 PROCNO 1

F2 - Acquisition Parameters  
 Date\_ 20170525  
 Time 3.31  
 INSTRUM spect  
 PROBRD 5 mm CPBBBO BB  
 PULPROG zgpg30  
 TD 32768  
 SOLVENT DMSO  
 NS 4000  
 DS 4  
 SWH 24038.461 Hz  
 FIDRES 0.733596 Hz  
 AQ 0.6815744 sec  
 RG 77.6  
 DW 20.800 usec  
 DE 18.00 usec  
 TE 298.0 K  
 D1 1.0000000 sec  
 D11 0.0300000 sec  
 TDO 500

----- CHANNEL f1 -----  
 SFO1 100.6238345 MHz  
 NUC1 13C  
 P1 9.84 usec  
 PLW1 38.00000000 W

----- CHANNEL f2 -----  
 SFO2 400.1316005 MHz  
 NUC2 1H  
 CPDPRG2 waltz16  
 PCPD2 80.00 usec  
 PLW2 8.14700031 W  
 PLW12 0.15600000 W  
 PLW13 0.09983800 W

F2 - Processing parameters  
 SI 32768  
 SF 100.6127690 MHz  
 WDW EM  
 SSB 0  
 LB 1.00 Hz  
 GB 0  
 PC 1.40

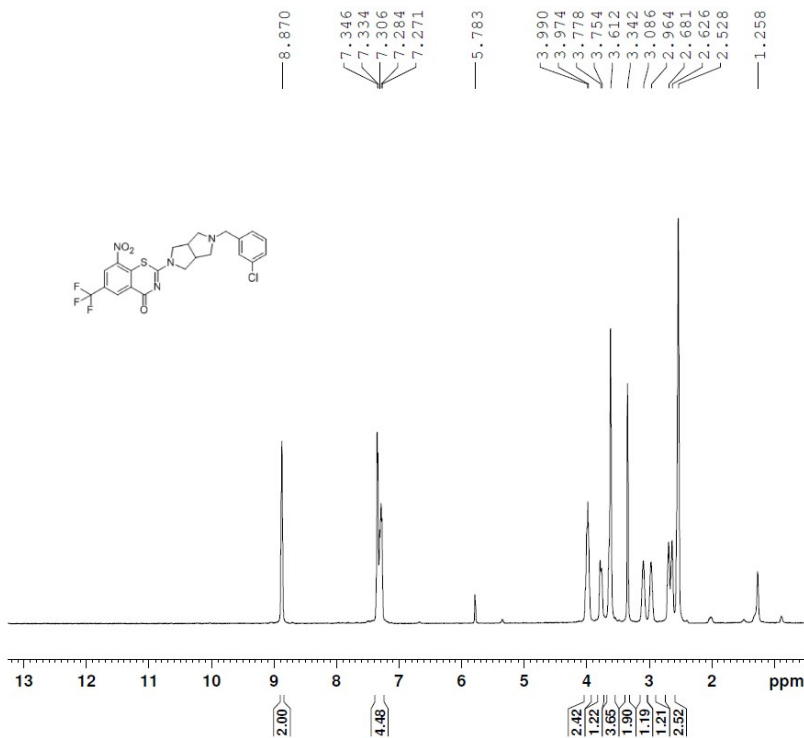

Current Data Parameters  
 NAME tzy-4-9  
 EXPNO 1  
 PROCNO 1

F2 - Acquisition Parameters  
 Date\_ 20170612  
 Time 9.25  
 INSTRUM WNMRI-500MHz  
 PULPROG zgpg30  
 TD 4800  
 SOLVENT DMSO  
 NS 14  
 DS 4  
 SWH 12000.000 Hz  
 AQ 2.0000000 sec  
 RG 64.1  
 DW 41.667 usec  
 DE 30.00 usec  
 TE 298.1 K  
 NUC1 1H  
 PL1 120.00 dB  
 SFO1 499.7053818 MHz

F2 - Processing parameters  
 SI 32768  
 SF 499.7041375 MHz  
 WDW EM  
 SSB 0  
 LB 1.00 Hz  
 GB 0.1  
 PC 1.00

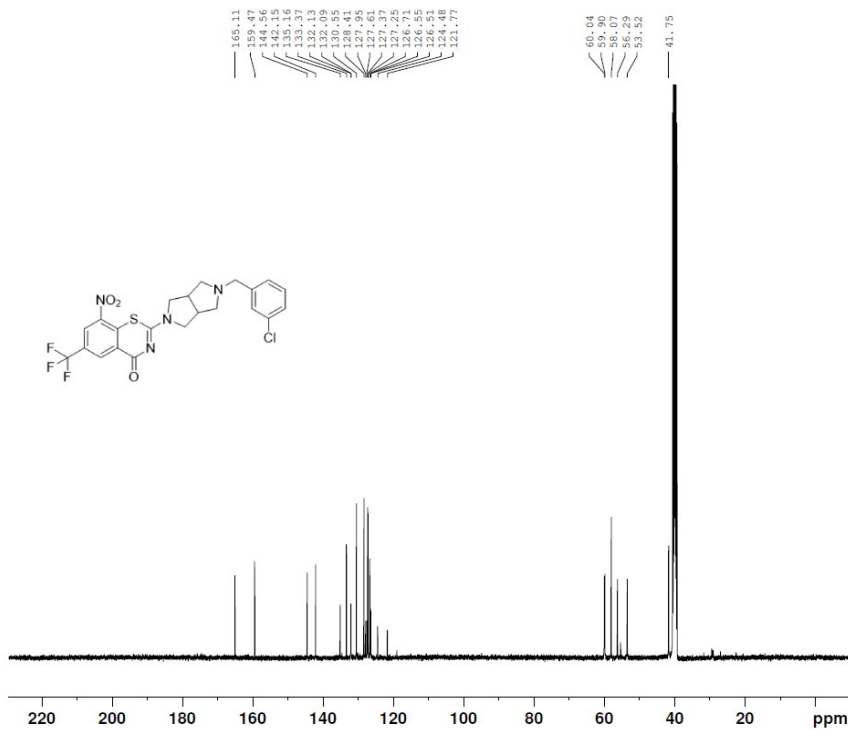

Current Data Parameters  
 NAME 20170616 tzy-4-9  
 EXPNO 1  
 PROCNO 1

F2 - Acquisition Parameters  
 Date\_ 20170616  
 Time 18.28  
 INSTRUM spect  
 PROBHD 5 mm CFPBBO BB  
 PULPROG zgpg30  
 TD 32768  
 SOLVENT DMSO  
 NS 4  
 DS 4  
 SWH 24038.461 Hz  
 FIDRES 0.733596 Hz  
 AQ 0.6815744 sec  
 RG 77.6  
 DW 20.800 usec  
 DE 18.00 usec  
 TE 298.0 K  
 D1 1.0000000 sec  
 D11 0.0300000 sec  
 TDO 600

===== CHANNEL f1 =====  
 SFO1 100.6233345 MHz  
 NUC1 13C  
 P1 9.84 usec  
 PLW1 38.0000000 W

===== CHANNEL f2 =====  
 SFO2 400.1316005 MHz  
 NUC2 1H  
 CPDPRG2 waltz16  
 PCPD2 80.00 usec  
 PLW2 8.14700031 W  
 PLW12 0.15600000 W  
 PLW13 0.09983800 W

F2 - Processing parameters  
 SI 32768  
 SF 100.6127690 MHz  
 WDW EM  
 SSB 0  
 LB 1.00 Hz  
 GB 0  
 PC 1.40

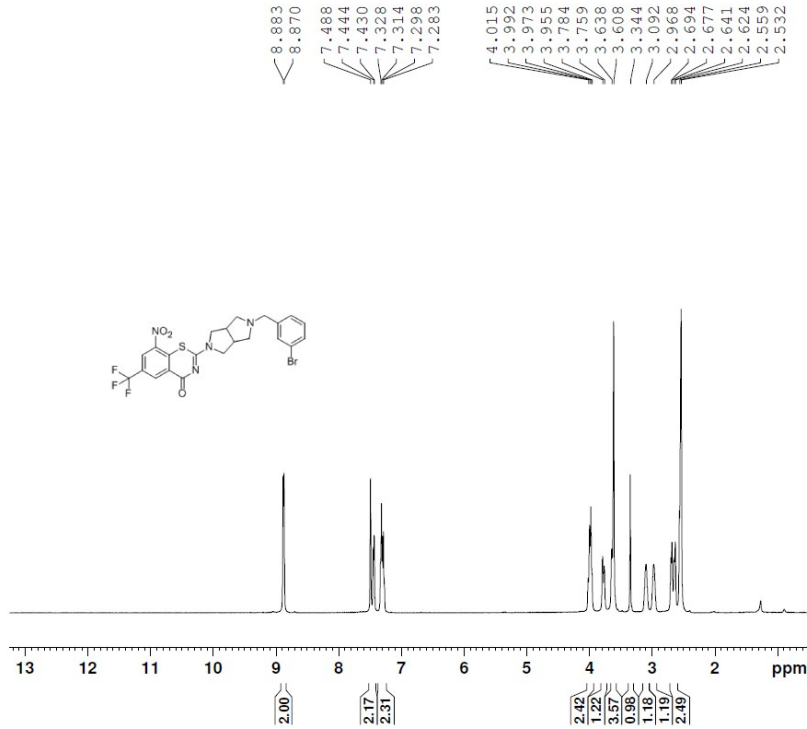

Current Data Parameters  
 NAME tzy-4-8  
 EXPNO 1  
 PROCNO 1  
 F2 - Acquisition Parameters  
 Date\_ 20170609  
 Time 8.52  
 INSTRUM WNMRI-500MHz  
 PULPROG slpul  
 TD 48000  
 SOLVENT DMSO  
 NS 17  
 DS 0  
 SWH 12000.000 Hz  
 AQ 2.0000000 sec  
 RG 62.9  
 DW 41.667 usec  
 DE 30.00 usec  
 TE 298.1 K  
 NUC1 1H  
 PL1 120.00 dB  
 SFO1 499.7053818 MHz

F2 - Processing parameters  
 SI 32768  
 SF 499.7041375 MHz  
 WDW EM  
 SSB 0  
 LB 1.00 Hz  
 GB 0.1  
 PC 1.00

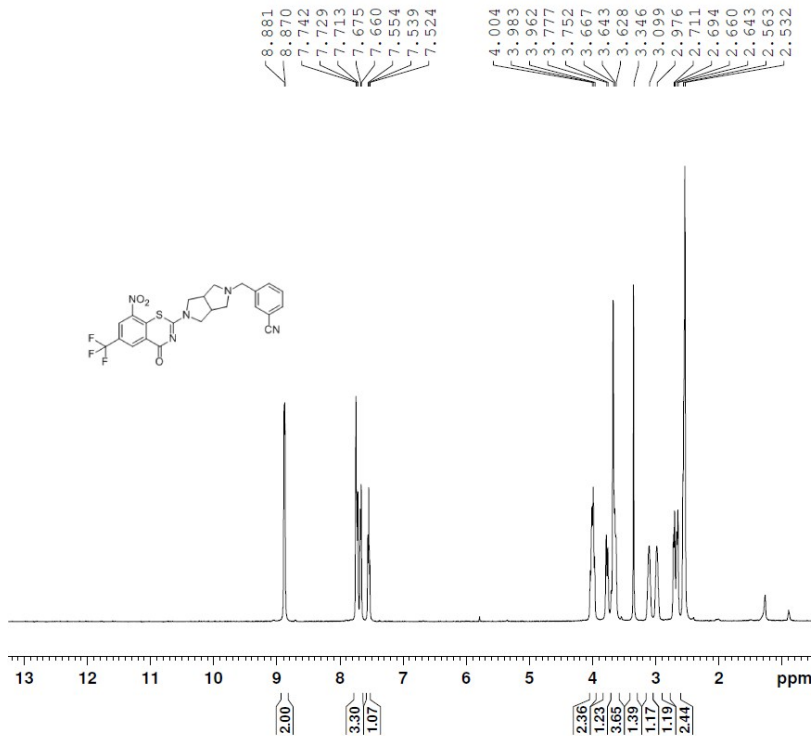

Current Data Parameters  
 NAME tzy-4-10  
 EXPNO 1  
 PROCNO 1  
 F2 - Acquisition Parameters  
 Date\_ 20170609  
 Time 8.58  
 INSTRUM WNMRI-500MHz  
 PULPROG slpul  
 TD 48000  
 SOLVENT DMSO  
 NS 10  
 DS 0  
 SWH 12000.000 Hz  
 AQ 2.0000000 sec  
 RG 62  
 DW 41.667 usec  
 DE 30.00 usec  
 TE 298.1 K  
 NUC1 1H  
 PL1 120.00 dB  
 SFO1 499.7053818 MHz

F2 - Processing parameters  
 SI 32768  
 SF 499.7041375 MHz  
 WDW EM  
 SSB 0  
 LB 1.00 Hz  
 GB 0.1  
 PC 1.00

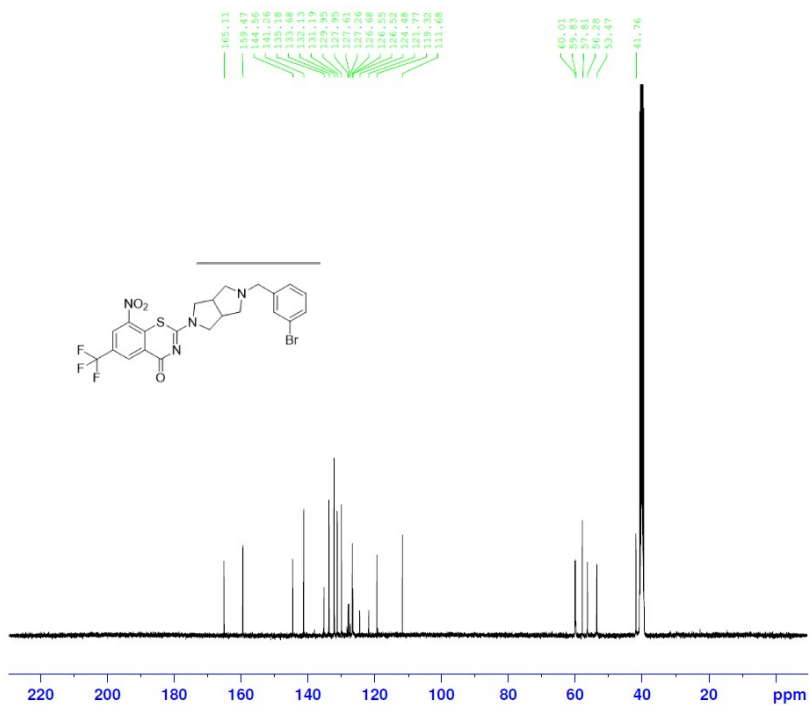

Current Data Parameters  
 NAME 20170616 tzy-4-10  
 EXPNO 1  
 PROCNO 1

F2 - Acquisition Parameters  
 Date\_ 20170616  
 Time 20.50  
 INSTRUM spect  
 PROBHD 5 mm CPPBBO BB  
 PULPROG zgpg30  
 TD 32768  
 SOLVENT DMSO  
 NS 4800  
 DS 4  
 SWH 24038.461 Hz  
 FIDRES 0.733596 Hz  
 AQ 0.6815744 sec  
 RG 77.6  
 DW 20.800 usec  
 DE 18.00 usec  
 TE 298.0 K  
 D1 1.00000000 sec  
 D11 0.03000000 sec  
 TDO 600

==== CHANNEL f1 =====  
 SFO1 100.6238345 MHz  
 NUC1 13C  
 P1 9.84 usec  
 PLW1 38.00000000 W

==== CHANNEL f2 =====  
 SFO2 400.1316005 MHz  
 NUC2 1H  
 CPDPRG2 waltz16  
 PCPD2 80.00 usec  
 PLW2 8.14700031 W  
 PLW12 0.15600000 W  
 PLW13 0.09983800 W

F2 - Processing parameters  
 SI 32768  
 SF 100.6127690 MHz  
 WDW EM  
 SSB 0  
 LB 1.00 Hz  
 GB 0  
 FC 1.40

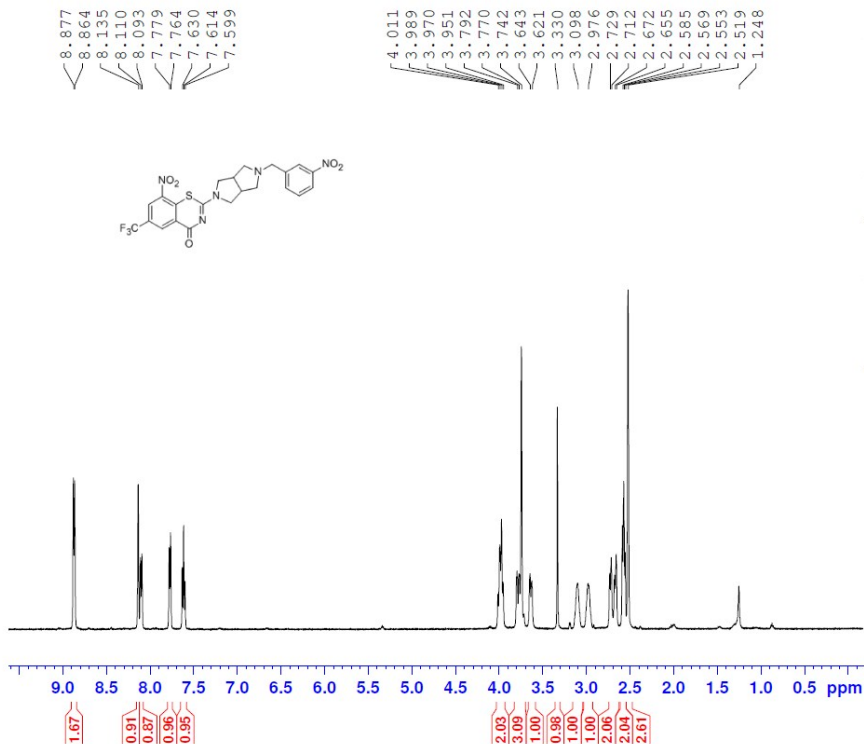

Current Data Parameters  
 NAME lq-2-82 20170525  
 EXPNO 1  
 PROCNO 1

F2 - Acquisition Parameters  
 Date\_ 20170525  
 Time 14.12  
 INSTRUM WNMN-I-500MHz  
 PULPROG slpul  
 TD 48000  
 SOLVENT DMSO  
 NS 16  
 DS 0  
 SWH 12000.000 Hz  
 AQ 2.00000000 sec  
 RG 63.2  
 DW 41.667 usec  
 DE 30.00 usec  
 TE 298.4 K  
 NUC1 1H  
 PL1 120.00 dB  
 SFO1 499.7053818 MHz

F2 - Processing parameters  
 SI 32768  
 SF 499.6981443 MHz  
 WDW no  
 SSB 0  
 LB 1.00 Hz  
 GB 0.1  
 FC 1.00

Bruker AVANCEIII 400 20170526  
 C13 DMSO D:\ DATA-2017 20

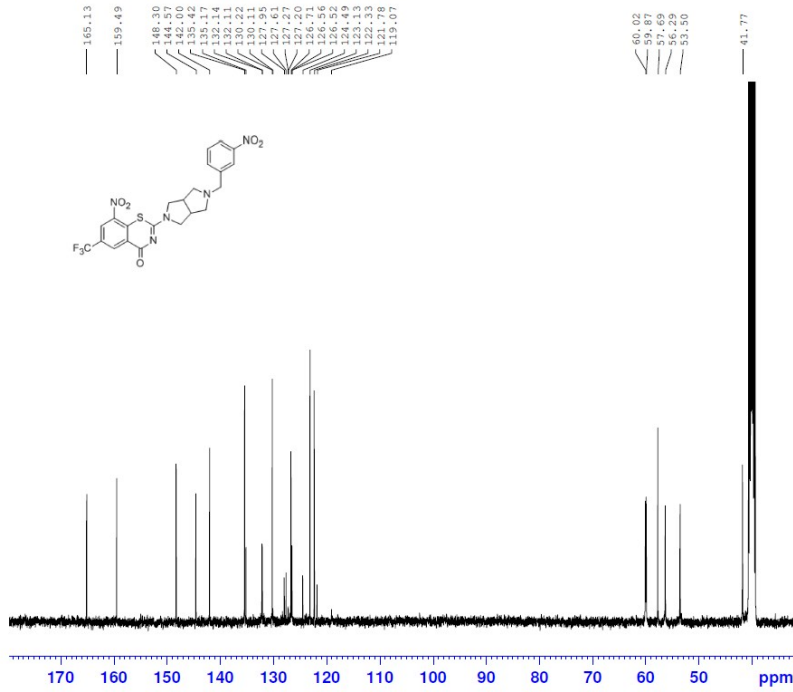

Current Data Parameters  
 NAME 20170526 IQ-2-82  
 EXPNO 1  
 PROCNO 1

F2 - Acquisition Parameters  
 Date\_ 20170528  
 Time 15.59  
 INSTRUM spect  
 PROBHD 5 mm CPPBBO BB  
 PULPROG zgpg30  
 TD 32768  
 SOLVENT DMSO  
 NS 3200  
 DS 4  
 SWH 24038.461 Hz  
 FIDRES 0.733596 Hz  
 AQ 0.6815744 sec  
 RG 77.6  
 DM 20.800 usec  
 DE 18.00 usec  
 TE 298.0 K  
 D1 1.00000000 sec  
 D11 0.03000000 sec  
 TDO 400

===== CHANNEL f1 =====  
 SFO1 100.6238345 MHz  
 NUC1 13C  
 P1 9.84 usec  
 PLW1 38.00000000 W  
 ===== CHANNEL f2 =====  
 SFO2 400.1316005 MHz  
 NUC2 1H  
 CPDPRG2 waltz16  
 PCPDZ 80.00 usec  
 PLW2 8.14700031 W  
 PLW12 0.15600000 W  
 PLW13 0.09983800 W

F2 - Processing parameters  
 SI 32768  
 SF 100.6127690 MHz  
 WW 0 EM  
 SSB 0  
 LB 1.00 Hz  
 GB 0  
 PC 1.40

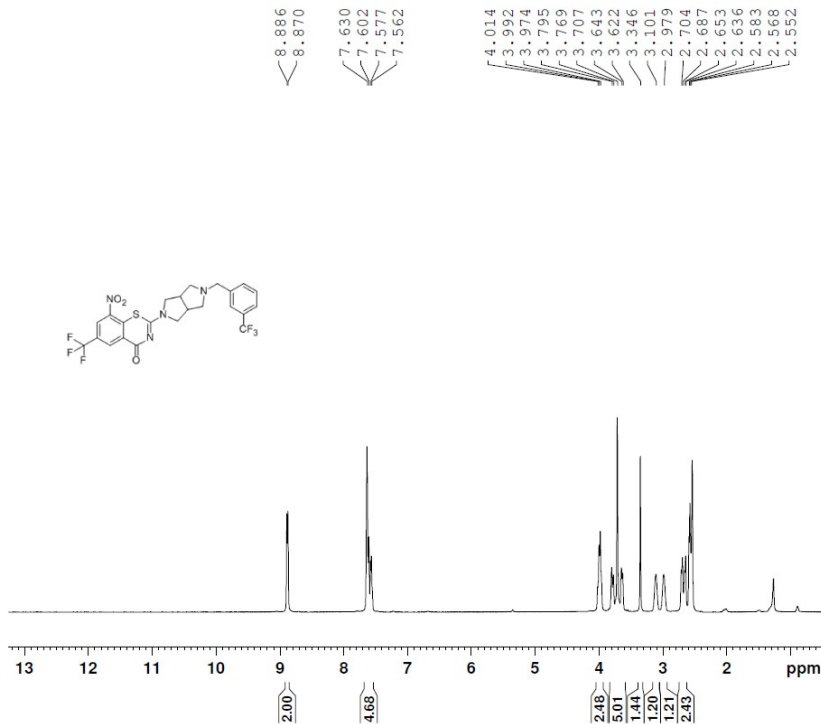

Current Data Parameters  
 NAME tzy-3-27 20170523  
 EXPNO 1  
 PROCNO 1

F2 - Acquisition Parameters  
 Date\_ 20170523  
 Time 15.56  
 INSTRUM WNMRI-500MHz  
 FULPROG siph1  
 TD 48000  
 SOLVENT DMSO  
 NS 24  
 DS 0  
 SWH 12000.000 Hz  
 AQ 2.0000000 sec  
 RG 62.5  
 DM 41.667 usec  
 DE 30.00 usec  
 TE 298.3 K  
 NUC1 1H  
 PL1 120.00 dB  
 SFO1 499.7053818 MHz

F2 - Processing parameters  
 SI 32768  
 SF 499.7041375 MHz  
 WW 0 EM  
 SSB 0  
 LB 1.00 Hz  
 GB 0.1  
 PC 1.00

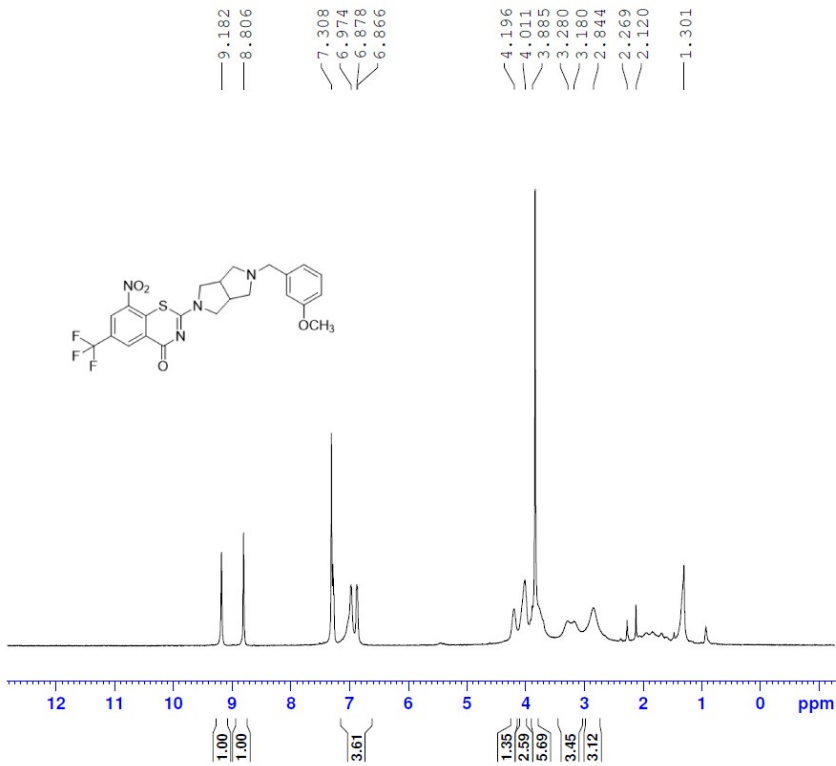

Current Data Parameters  
 NAME test9  
 EXPNO 1  
 PROCNO 1

F2 - Acquisition Parameters  
 Date\_ 20170612  
 Time 9.04  
 INSTRUM WNMRI-500MHz  
 PULPROG zgpg30  
 TD 48000  
 SOLVENT CDCl3  
 NS 19  
 DS 0  
 SWH 12000.000 Hz  
 AQ 2.0000000 sec  
 RG 66.4  
 DW 41.667 usec  
 DE 30.00 usec  
 TE 298.1 K  
 NUC1 1H  
 PL1 120.00 dB  
 SFO1 499.7053818 MHz

F2 - Processing parameters  
 SI 32768  
 SF 499.7017639 MHz  
 WDW EM  
 SSB 0  
 LB 1.00 Hz  
 GB 0.1  
 PC 1.00

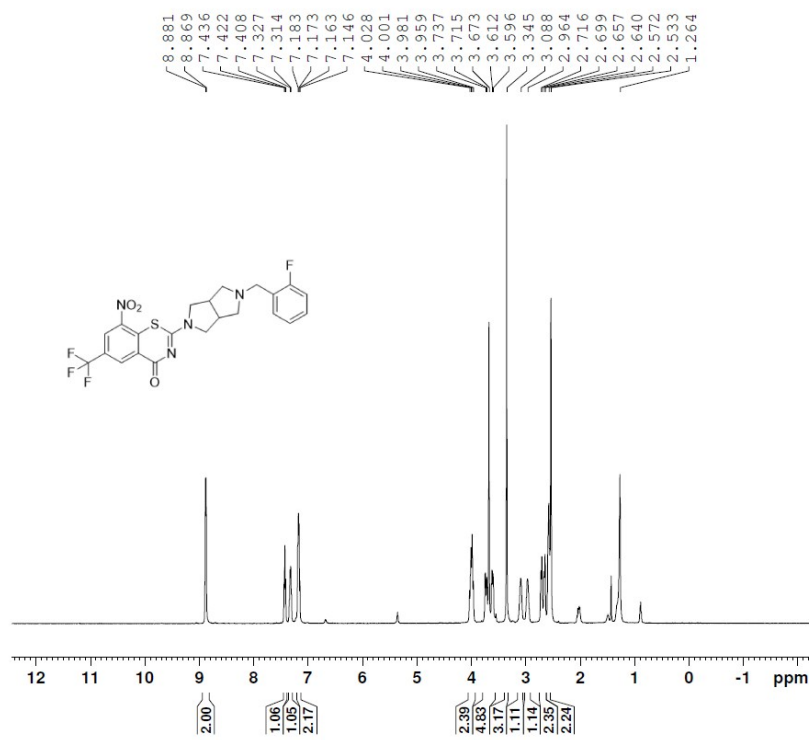

Current Data Parameters  
 NAME tzy-3-26 20170522  
 EXPNO 1  
 PROCNO 1

F2 - Acquisition Parameters  
 Date\_ 20170522  
 Time 10.21  
 INSTRUM WNMRI-500MHz  
 PULPROG zgpg30  
 TD 48000  
 SOLVENT DMSO  
 NS 20  
 DS 0  
 SWH 12000.000 Hz  
 AQ 2.0000000 sec  
 RG 63.8  
 DW 41.667 usec  
 DE 30.00 usec  
 TE 298.3 K  
 NUC1 1H  
 PL1 120.00 dB  
 SFO1 499.7053818 MHz

F2 - Processing parameters  
 SI 32768  
 SF 499.7041375 MHz  
 WDW EM  
 SSB 0  
 LB 1.00 Hz  
 GB 0.1  
 PC 1.00

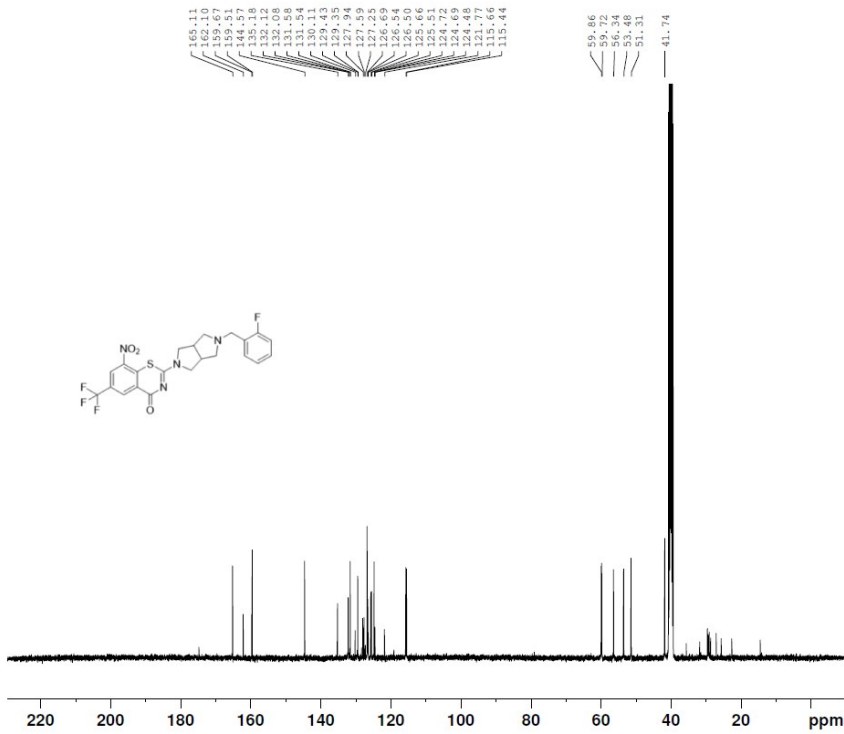

Current Data Parameters  
 NAME 20170523 TZY-3-26  
 EXPNO 1  
 PROCNO 1

F2 - Acquisition Parameters  
 Date\_ 20170525  
 Time 1.32  
 INSTRUM spect  
 PROBHD 5 mm CPPBBO BB  
 PULPROG zgpg30  
 TD 32768  
 SOLVENT DMSO  
 NS 4000  
 DS 4  
 SWH 24038.461 Hz  
 FIDRES 0.733596 Hz  
 AQ 0.6815744 sec  
 RG 77.6  
 DW 20.800 usec  
 DE 18.00 usec  
 TE 298.0 K  
 D1 1.00000000 sec  
 D11 0.03000000 sec  
 TD0 500

===== CHANNEL f1 =====  
 SFO1 100.6238345 MHz  
 NUC1 13C  
 PL1 9.84 usec  
 PLW1 38.0000000 W

===== CHANNEL F2 =====  
 SFO2 400.1316005 MHz  
 NUC2 1H  
 CPDPRG2 waltz16  
 PCPD2 80.00 usec  
 PLW2 8.14700031 W  
 PLW12 0.15600000 W  
 PLW13 0.09983800 W

F2 - Processing parameters  
 SI 32768  
 SF 100.6127690 MHz  
 WDW EM  
 SSB 0  
 LB 1.00 Hz  
 GB 0  
 PC 1.40

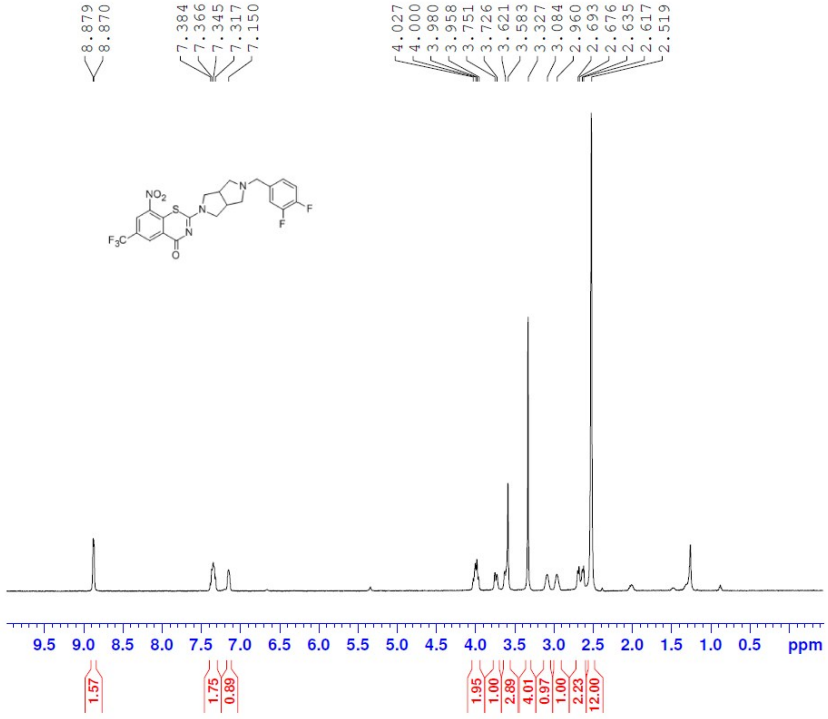

Current Data Parameters  
 NAME lq-2-66 20170522  
 EXPNO 1  
 PROCNO 1

F2 - Acquisition Parameters  
 Date\_ 20170522  
 Time 10.18  
 INSTRUM WNMRI-500MHz  
 PULPROG slpul  
 TD 48000  
 SOLVENT DMSO  
 NS 19  
 DS 0  
 SWH 12000.000 Hz  
 AQ 2.0000000 sec  
 RG 73.9  
 DW 41.667 usec  
 DE 30.00 usec  
 TE 298.4 K  
 NUC1 1H  
 PL1 120.00 dB  
 SFO1 499.7053818 MHz

F2 - Processing parameters  
 SI 32768  
 SF 499.6981438 MHz  
 WDW EM  
 SSB 0  
 LB 1.00 Hz  
 GB 0.1  
 PC 1.00

Bruker AVANCEIII 400 20170524  
 C13 DMSO D:\ DATA-2017 32

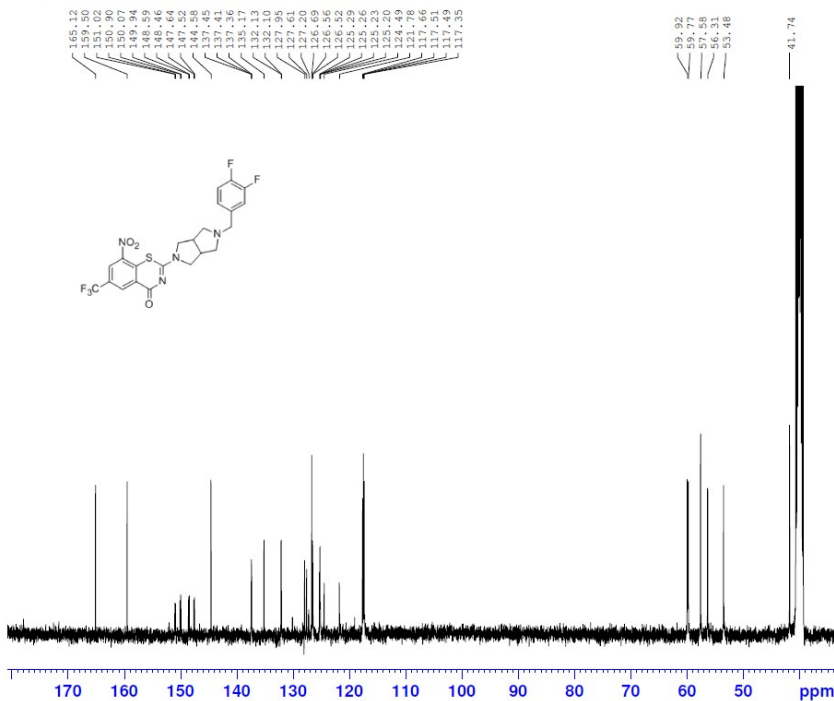

Current Data Parameters  
 NAME 20170524 lq-2-66  
 EXPNO 1  
 PROCNO 1

F2 - Acquisition Parameters  
 Date\_ 20170524  
 Time 17.59  
 INSTRUM spect  
 PROBHD 5 mm CPMBO BB  
 PULPROG zgpg30  
 TD 32768  
 SOLVENT DMSO  
 NS 3200  
 DS 4  
 SWH 24038.461 Hz  
 FIDRES 0.733596 Hz  
 AQ 0.6815744 sec  
 RG 77.6  
 DW 20.800 usec  
 DE 18.00 usec  
 TE 298.0 K  
 D1 1.0000000 sec  
 D11 0.0300000 sec  
 TDO 400

==== CHANNEL f1 =====  
 SFO1 100.6238345 MHz  
 NUC1 13C  
 P1 9.84 usec  
 PLW1 38.0000000 W

==== CHANNEL f2 =====  
 SFO2 400.1316005 MHz  
 NUC2 1H  
 CPDPRG2 waltz16  
 PCPD2 80.00 usec  
 PLW2 8.14700031 W  
 PLW12 0.15600000 W  
 PLW13 0.09983800 W

F2 - Processing parameters  
 SI 32768  
 SF 100.6127690 MHz  
 WDW EM  
 SSB 0  
 LB 1.00 Hz  
 GB 0  
 PC 1.40

8.885  
 8.869  
 7.574  
 7.558  
 7.536  
 7.312  
 7.296  
 4.010  
 3.985  
 3.966  
 3.947  
 3.767  
 3.741  
 3.629  
 3.597  
 3.345  
 3.076  
 2.966  
 2.693  
 2.675  
 2.639  
 2.621  
 2.520  
 1.250

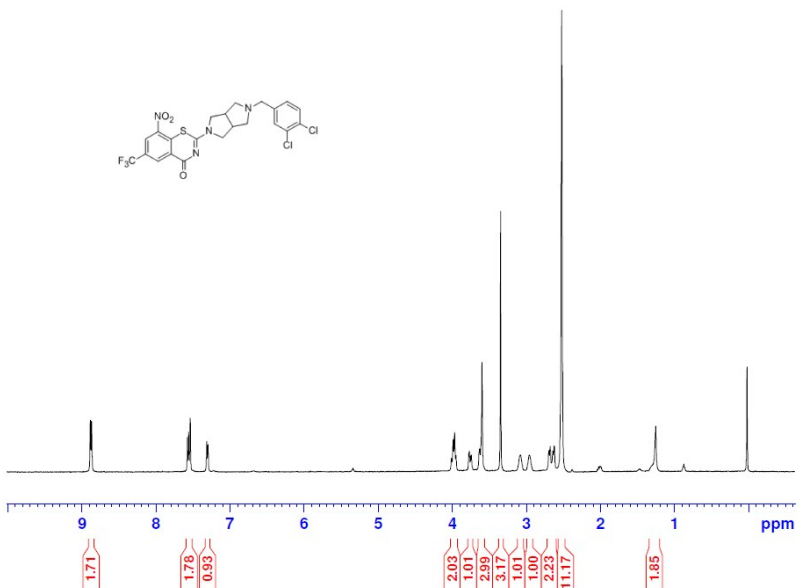

Current Data Parameters  
 NAME lq-2-73 5 19 2017  
 EXPNO 1  
 PROCNO 1

F2 - Acquisition Parameters  
 Date\_ 20170519  
 Time 10.30  
 INSTRUM WNMRI-500MHz  
 PULPROG s1pul  
 TD 48000  
 SOLVENT DMSO  
 NS 12  
 DS 0  
 SWH 12000.000 Hz  
 AQ 2.0000000 sec  
 RG 57.3  
 DW 41.667 usec  
 DE 30.00 usec  
 TE 293.6 K  
 NUC1 1H  
 PL1 120.00 dB  
 SFO1 499.7053818 MHz

F2 - Processing parameters  
 SI 32768  
 SF 499.6981427 MHz  
 WDW EM  
 SSB 0  
 LB 1.00 Hz  
 GB 0.1  
 PC 1.00



Bruker AVANCEIII 400 20170524  
 C13 DMSO D:\ DATA-2017 35

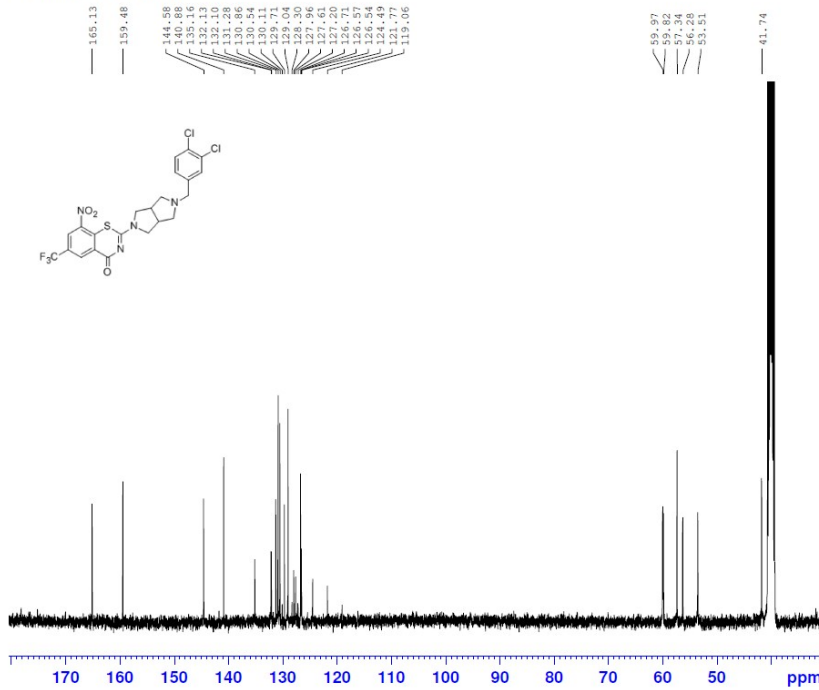

Current Data Parameters  
 NAME 20170524 lq-2-73  
 EXPNO 1  
 PROCNO 1

F2 - Acquisition Parameters  
 Date\_ 20170524  
 Time 22.45  
 INSTRUM spect  
 PROBHD 5 mm CPPBBO BB  
 PULPROG zgpg30  
 TD 32768  
 SOLVENT DMSO  
 NS 3200  
 DS 4  
 SWH 24038.461 Hz  
 FIDRES 0.733596 Hz  
 AQ 0.6815744 sec  
 RG 77.6  
 DW 20.800 usec  
 DE 18.00 usec  
 TE 298.0 K  
 D1 1.0000000 sec  
 D11 0.0300000 sec  
 TD0 400

==== CHANNEL F1 =====  
 SFO1 100.6238345 Mhz  
 NUC1 13C  
 P1 9.84 usec  
 PLW1 38.0000000 W

==== CHANNEL F2 =====  
 SFO2 400.1316005 Mhz  
 NUC2 1H  
 CPDPRG2 waltr16  
 PCPD2 80.00 usec  
 PLW2 8.14700031 W  
 PLW12 0.15600000 W  
 PLW13 0.09983800 W

F2 - Processing parameters  
 SI 32768  
 SF 100.6127690 Mhz  
 WDW EM  
 SSB 0  
 LB 1.00 Hz  
 GB 0  
 PC 1.40

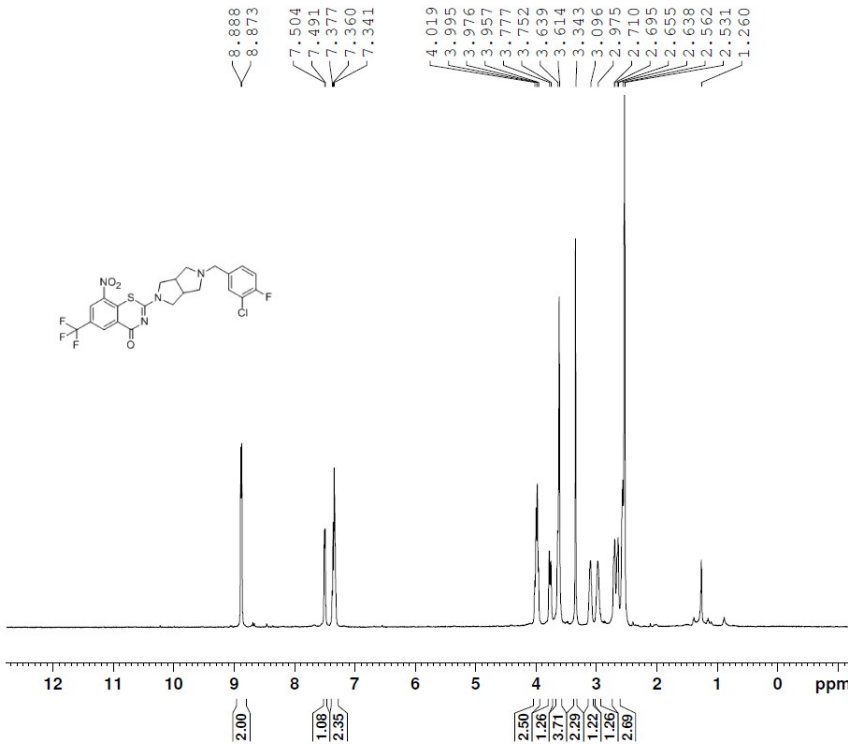

Current Data Parameters  
 NAME test7  
 EXPNO 1  
 PROCNO 1

F2 - Acquisition Parameters  
 Date\_ 20170531  
 Time 14.46  
 INSTRUM WNMRI-500Mhz  
 PULPROG sfpul  
 TD 48000  
 SOLVENT DMSO  
 NS 16  
 DS 0  
 SWH 12000.000 Hz  
 AQ 2.0000000 sec  
 RG 65.9  
 DW 41.667 usec  
 DE 30.00 usec  
 TE 298.1 K  
 NUC1 1H  
 PL1 120.00 dB  
 SFO1 499.7053818 Mhz

F2 - Processing parameters  
 SI 32768  
 SF 499.7041375 Mhz  
 WDW EM  
 SSB 0  
 LB 1.00 Hz  
 GB 0.1  
 PC 1.00

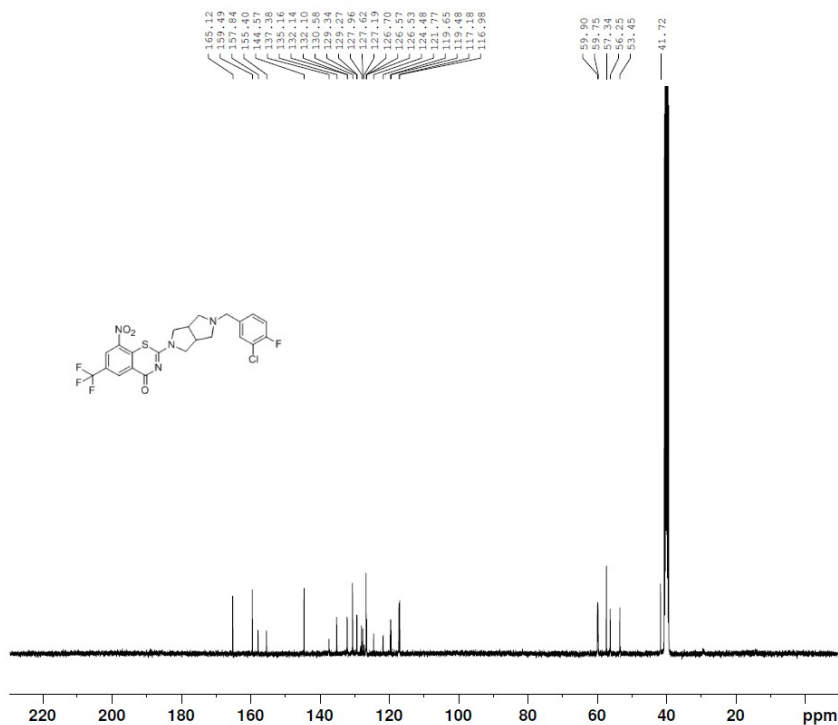

Current Data Parameters  
 NAME 20170607 test7  
 EXPNO 1  
 PROCNO 1

F2 - Acquisition Parameters  
 Date\_ 20170608  
 Time 22.57  
 INSTRUM spect  
 PROBHD 5 mm CPPBBO BB  
 PULPROG zgpg30  
 TD 32768  
 SOLVENT DMSO  
 NS 4000  
 DS 4  
 SWH 24038.461 Hz  
 FIDRES 0.733596 Hz  
 AQ 0.6815744 sec  
 RG 77.6  
 DW 20.800 usec  
 DE 18.00 usec  
 TE 298.0 K  
 D1 1.00000000 sec  
 D11 0.03000000 sec  
 TDO 500

===== CHANNEL f1 =====  
 SFO1 100.6238345 MHz  
 NUC1 13C  
 P1 9.84 usec  
 PLW1 38.00000000 W

===== CHANNEL f2 =====  
 SFO2 400.1316005 MHz  
 NUC2 1H  
 CPDPRG2 waltz16  
 PCPD2 80.00 usec  
 PLW2 8.14700031 W  
 PLW12 0.15600000 W  
 PLW13 0.09983800 W

F2 - Processing parameters  
 SI 32768  
 SF 100.6127690 MHz  
 WDW EM  
 SSB 0  
 LB 1.00 Hz  
 GB 0  
 PC 1.40

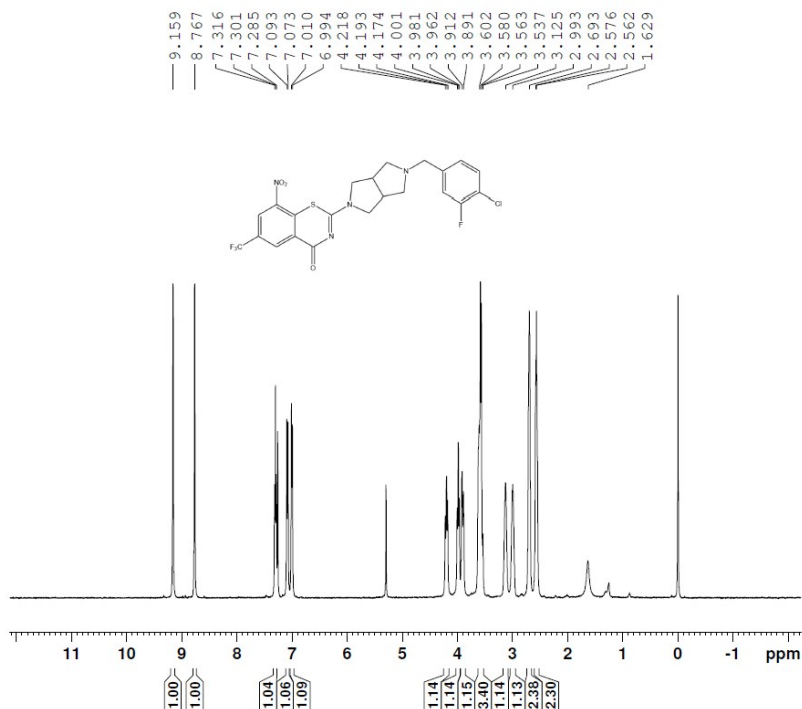

Current Data Parameters  
 NAME tzy-2-25-20200115  
 EXPNO 1  
 PROCNO 1

F2 - Acquisition Parameters  
 Date\_ 20200115  
 Time 16.14  
 INSTRUM WNMRI-500MHz  
 PULPROG slpul  
 TD 48000  
 SOLVENT CDCl3  
 NS 3  
 DS 0  
 SWH 12000.000 Hz  
 AQ 1.9999999 sec  
 RG 35  
 DW 41.667 usec  
 DE 30.00 usec  
 TE 298.1 K  
 NUC1 1H  
 PL1 120.00 dB  
 SFO1 499.6739824 MHz

F2 - Processing parameters  
 SI 32768  
 SF 499.6703905 MHz  
 WDW EM  
 SSB 0  
 LB 1.00 Hz  
 GB 0.1  
 PC 1.00

Bruker AVANCEIII 400 20170418  
 C13 CDC13 D:\ DATA-2017 31

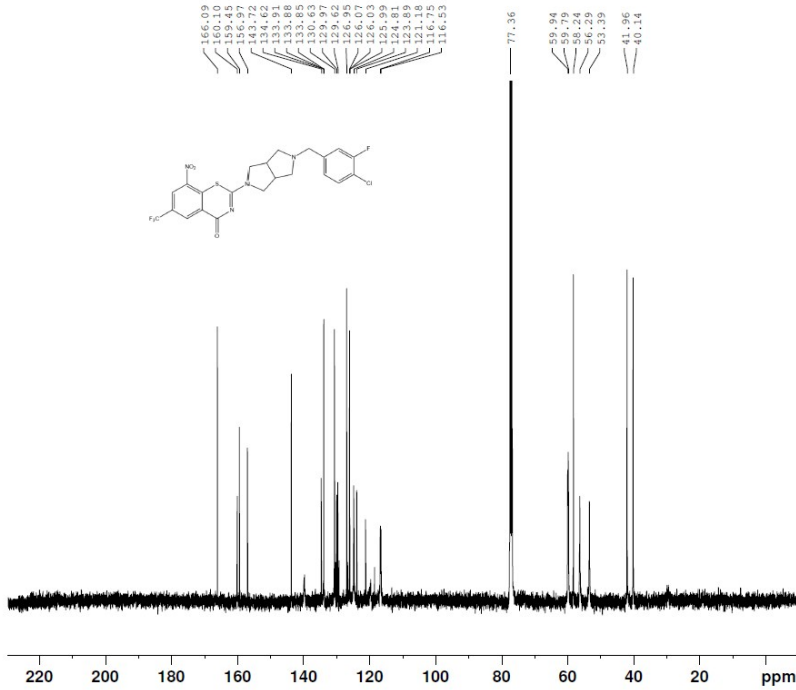

Current Data Parameters  
 NAME 20170418 tzy-2-25  
 EXPNO 1  
 PROCNO 1

F2 - Acquisition Parameters  
 Date\_ 20170419  
 Time 2.54  
 INSTRUM spect  
 PROBHD 5 mm CPPBBO BB  
 PULPROG zgpg30  
 TD 32768  
 SOLVENT CDC13  
 NS 4000  
 DS 4  
 SWH 24038.461 Hz  
 FIDRES 0.733596 Hz  
 AQ 0.6815744 sec  
 RG 77.6  
 DW 20.800 usec  
 DE 18.00 usec  
 TE 298.3 K  
 D1 1.0000000 sec  
 D11 0.0300000 sec  
 TDO 500

===== CHANNEL f1 =====  
 SFO1 100.6238345 MHz  
 NUC1 13C  
 P1 9.84 usec  
 PLW1 38.00000000 W

===== CHANNEL f2 =====  
 SFO2 400.1316005 MHz  
 NUC2 1H  
 CPDPRG2 waltz16  
 PCPD2 80.00 usec  
 PLW2 8.14700031 W  
 PLW12 0.15600000 W  
 PLW13 0.09983800 W

F2 - Processing parameters  
 SI 32768  
 SF 100.6127577 MHz  
 WDW EM  
 SSB 0  
 LB 1.00 Hz  
 GB 0  
 PC 1.40

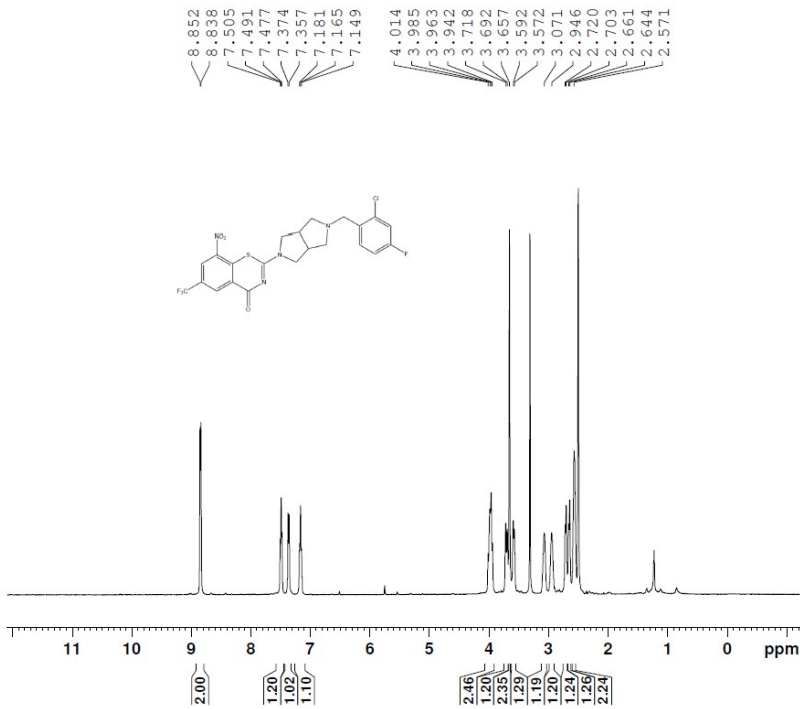

Current Data Parameters  
 NAME test5  
 EXPNO 1  
 PROCNO 1

F2 - Acquisition Parameters  
 Date\_ 20170531  
 Time 14.49  
 INSTRUM WNMRI-500MHz  
 FULPROG e1pr1  
 TD 48000  
 SOLVENT DMSO  
 NS 16  
 DS 0  
 SWH 12000.000 Hz  
 AQ 2.0000000 sec  
 RG 64.5  
 DW 41.667 usec  
 DE 30.00 usec  
 TE 298.3 K  
 NUC1 1H  
 PL1 120.00 dB  
 SFO1 499.7053818 MHz

F2 - Processing parameters  
 SI 32768  
 SF 499.6981530 MHz  
 WDW EM  
 SSB 0  
 LB 1.00 Hz  
 GB 0.1  
 PC 1.00

Bruker AVANCEIII 400 20170607  
 C13 DMSO D:\DATA-2017 36

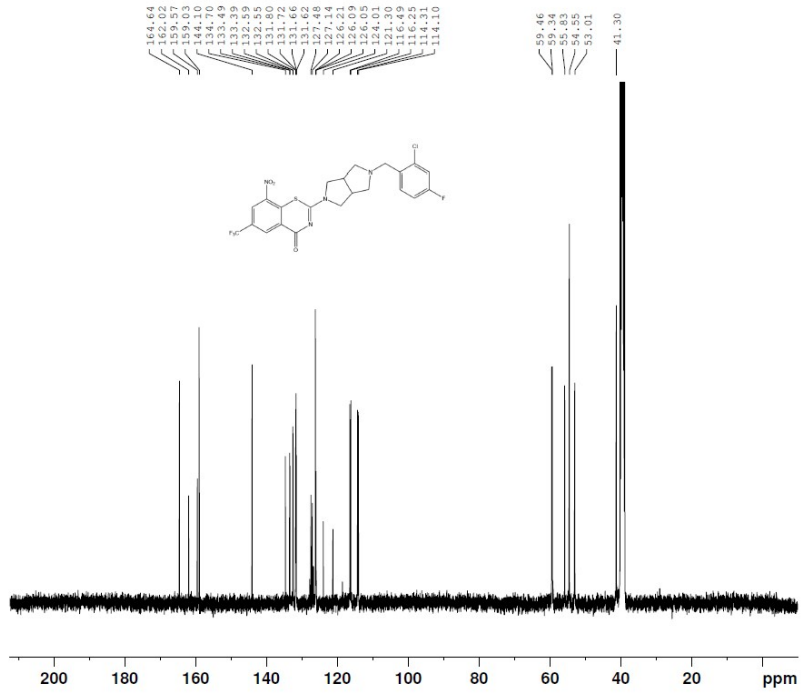

```
Current Data Parameters
NAME      20170607 test5
EXPNO    1
PROCNO   1

F2 - Acquisition Parameters
Date_    20170608
Time     19.00
INSTRUM  spect
PROBHD   5 mm CPPBBO BB
PULPROG  zgpg30
TD       32768
SOLVENT  DMSO
NS       4000
DS       4
SWH      24038.461 Hz
FIDRES   0.733596 Hz
AQ       0.6815744 sec
RG       77.6
DW       20.800 usec
DE       18.00 usec
TE       298.0 K
D1       1.00000000 sec
D11      0.03000000 sec
TD0      500

===== CHANNEL f1 =====
SFO1     100.6238345 MHz
NUC1     13C
P1       9.84 usec
PLW1     38.00000000 W

===== CHANNEL f2 =====
SFO2     400.1316005 MHz
NUC2     1H
CPDPRG2  waltz16
PCPD2    80.00 usec
PLW2     8.14700031 W
PLW12    0.15600000 W
PLW13    0.09983800 W

F2 - Processing parameters
SI       32768
SF       100.6128160 MHz
WDW      EM
SSB      0
LB       1.00 Hz
GB       0
PC       1.40
```

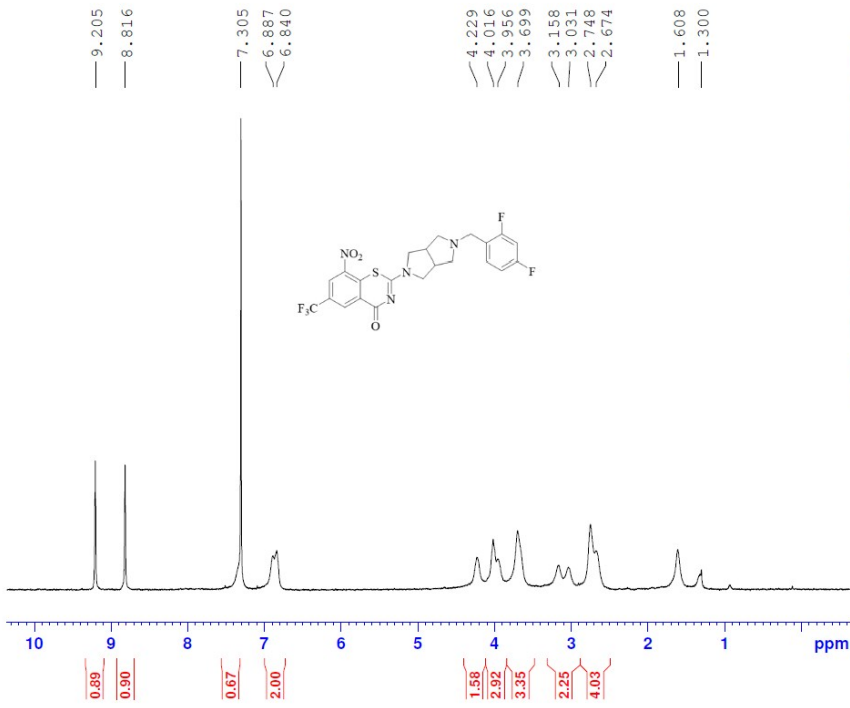

```
Current Data Parameters
NAME      lq-2-67 0511
EXPNO    1
PROCNO   1

F2 - Acquisition Parameters
Date_    20170511
Time     14.25
INSTRUM  WNMN-1-500MHz
PULPROG  sipul
TD       48000
SOLVENT  CDCl3
NS       9
DS       0
SWH      12000.000 Hz
AQ       2.0000000 sec
RG       72.7
DW       41.667 usec
DE       30.00 usec
TE       298.3 K
NUC1     1H
PL1      120.00 dB
SFO1     499.7053818 MHz

F2 - Processing parameters
SI       32768
SF       499.7017639 MHz
WDW      EM
SSB      0
LB       1.00 Hz
GB       0.1
PC       1.00
```

Bruker AVANCEIII 400 20170524  
 C13 DMSO D:\\\\ DATA-2017 33

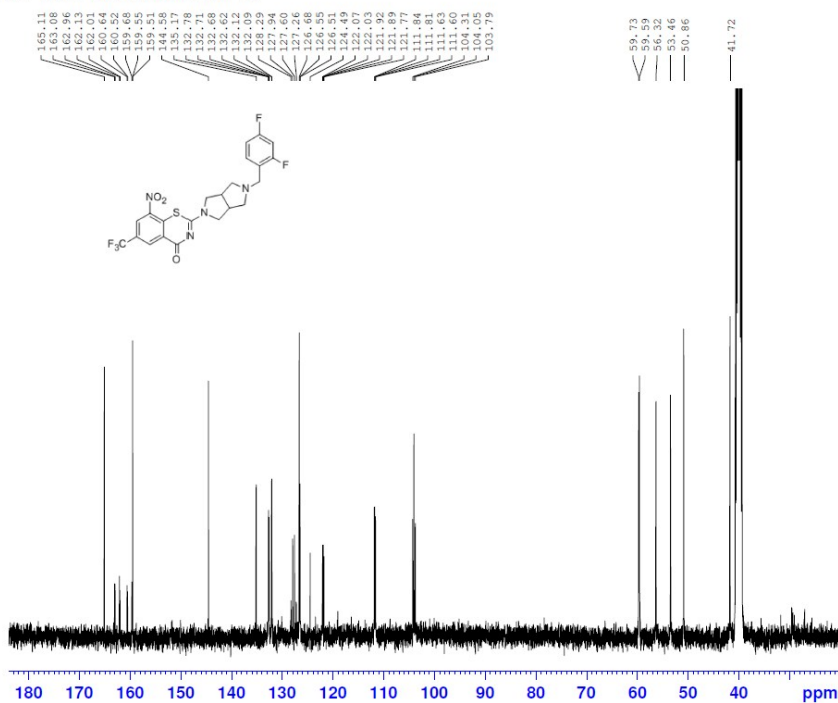

Current Data Parameters  
 NAME 20170524 lq-2-67  
 EXPNO 1  
 PROCNO 1

F2 - Acquisition Parameters  
 Date\_ 20170524  
 Time\_ 19.34  
 INSTRUM spect  
 PROHHD 5 mm CPPBBO BB  
 PULPROG zgpg30  
 TD 32768  
 SOLVENT DMSO  
 NS 3200  
 DS 4  
 SWH 24038.461 Hz  
 FIDRES 0.733596 Hz  
 AQ 0.6815744 sec  
 RG 77.6  
 DW 20.800 usec  
 DE 18.00 usec  
 TE 298.0 K  
 D1 1.00000000 sec  
 D11 0.03000000 sec  
 TD0 400

==== CHANNEL f1 =====  
 SFO1 100.6238345 MHz  
 NUC1 13C  
 P1 9.84 usec  
 PLW1 38.00000000 W

==== CHANNEL f2 =====  
 SFO2 400.1316005 MHz  
 NUC2 1H  
 CPDPRG2 waltz16  
 PCPD2 80.00 usec  
 PLW2 8.14700031 W  
 PLW12 0.15600000 W  
 PLW13 0.09983800 W

F2 - Processing parameters  
 SI 32768  
 SF 100.6127690 MHz  
 WDW EM  
 SSB 0  
 LB 1.00 Hz  
 GB 0  
 PC 1.40

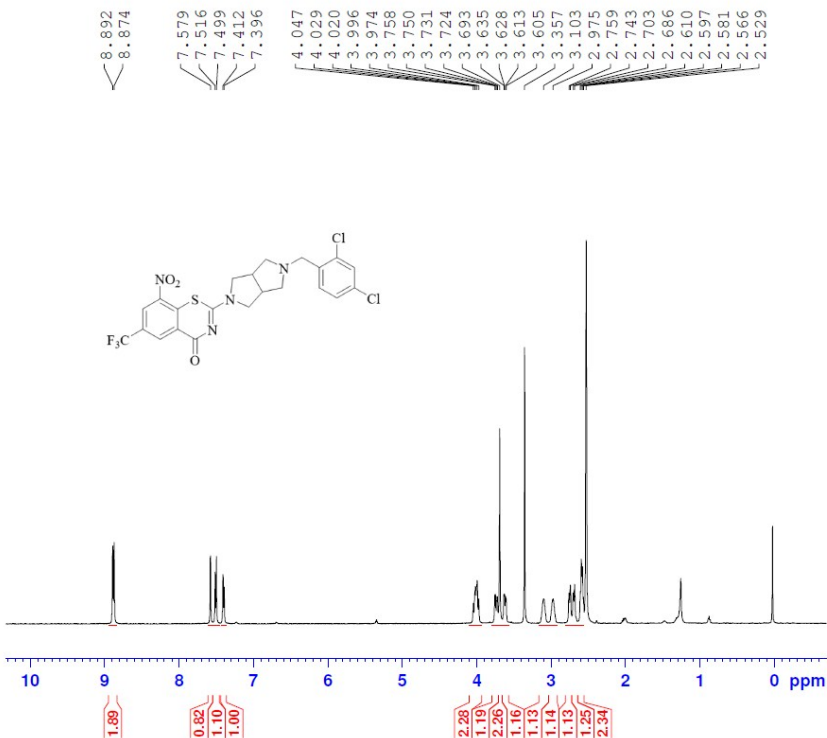

Current Data Parameters  
 NAME lq-2-72 05192017  
 EXPNO 1  
 PROCNO 1

F2 - Acquisition Parameters  
 Date\_ 20170519  
 Time\_ 10.28  
 INSTRUM WNMRI-500MHz  
 PULPROG spul  
 TD 48000  
 SOLVENT DMSO  
 NS 13  
 DS 0  
 SWH 12000.000 Hz  
 AQ 2.0000000 sec  
 RG 70.7  
 DW 41.667 usec  
 DE 30.00 usec  
 TE 293.5 K  
 NUC1 1H  
 PL1 120.00 dB  
 SFO1 499.7053818 MHz

F2 - Processing parameters  
 SI 32768  
 SF 499.7041375 MHz  
 WDW EM  
 SSB 0  
 LB 1.00 Hz  
 GB 0.1  
 PC 1.00

Bruker AVANCEIII 400 20170524  
 C13 DMSO D:\ DATA-2017 34

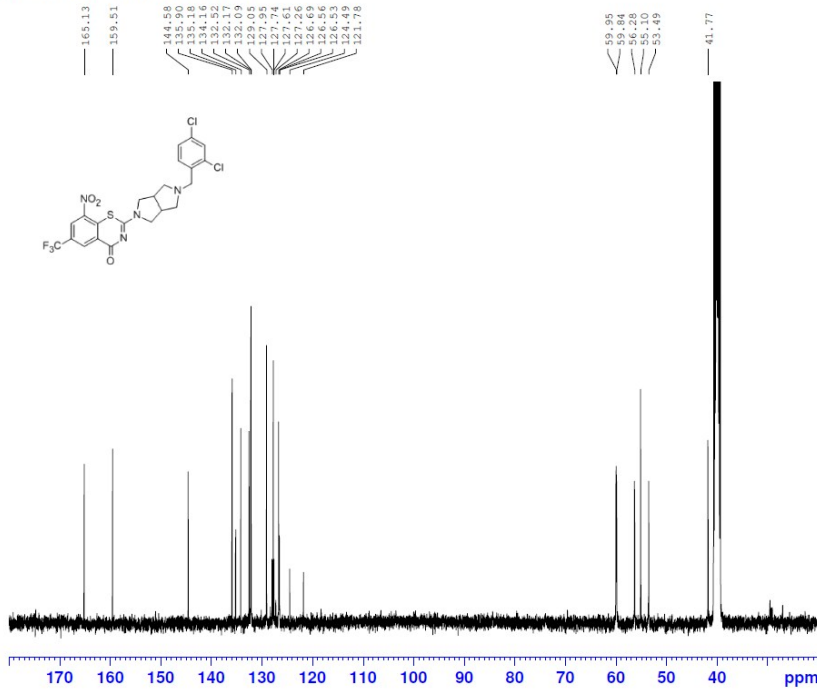

Current Data Parameters  
 NAME 20170524 lq-2-72  
 EXPNO 1  
 PROCNO 1

F2 - Acquisition Parameters  
 Date\_ 20170524  
 Time 21.09  
 INSTRUM spect  
 PROBHD 5 mm CPPBBO BB  
 PULPROG zgpg30  
 TD 32768  
 SOLVENT DMSO  
 NS 3200  
 DS 4  
 SWH 24038.461 Hz  
 FIDRES 0.733596 Hz  
 AQ 0.6815744 sec  
 RG 77.6  
 DW 20.800 usec  
 DE 18.00 usec  
 TE 298.0 K  
 D1 1.00000000 sec  
 D11 0.03000000 sec  
 TD0 400

----- CHANNEL f1 -----  
 SFO1 100.6238345 MHz  
 NUC1 13C  
 P1 9.84 usec  
 PLW1 38.00000000 W

----- CHANNEL f2 -----  
 SFO2 400.1316005 MHz  
 NUC2 1H  
 CPDPRG2 waltz16  
 PCPD2 80.00 usec  
 PLW2 8.14700031 W  
 PLW12 0.15600000 W  
 PLW13 0.09983800 W

F2 - Processing parameters  
 SI 32768  
 SF 100.6127690 MHz  
 WDW EM  
 SSB 0  
 LB 1.00 Hz  
 GB 0  
 FC 1.40

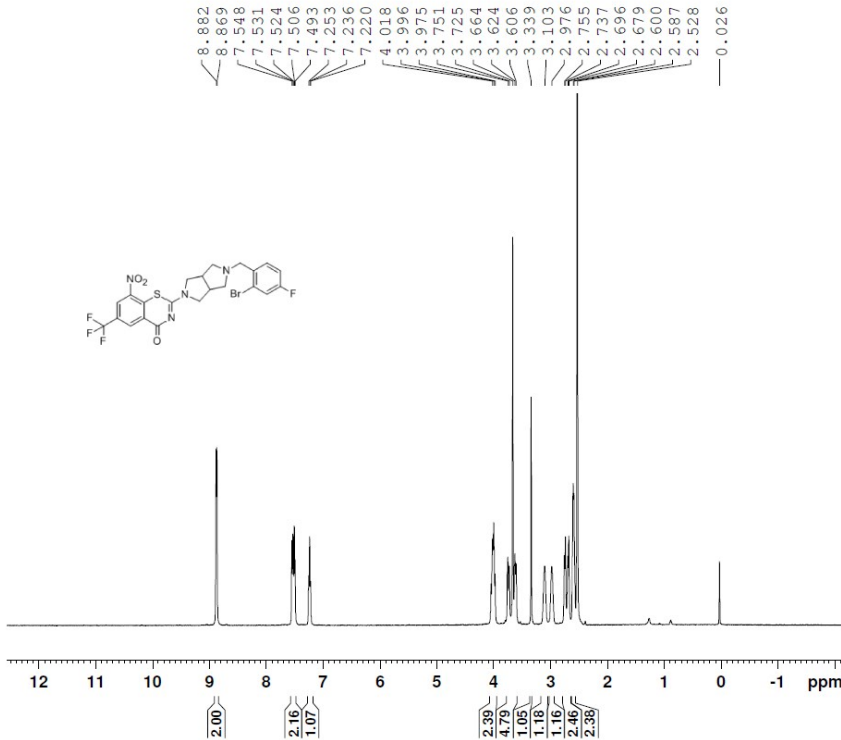

Current Data Parameters  
 NAME tzy-3-33  
 EXPNO 1  
 PROCNO 1

F2 - Acquisition Parameters  
 Date\_ 20170526  
 Time 16.30  
 INSTRUM WNMRI-500MHz  
 PULPROG sipul  
 TD 48000  
 SOLVENT DMSO  
 NS 17  
 DS 0  
 SWH 12000.000 Hz  
 AQ 2.0000000 sec  
 RG 66.3  
 DW 41.667 usec  
 DE 30.00 usec  
 TE 298.1 K  
 NUC1 1H  
 PL1 120.00 dB  
 SFO1 499.7053818 MHz

F2 - Processing parameters  
 SI 32768  
 SF 499.7041375 MHz  
 WDW EM  
 SSB 0  
 LB 1.00 Hz  
 GB 0.1  
 FC 1.00

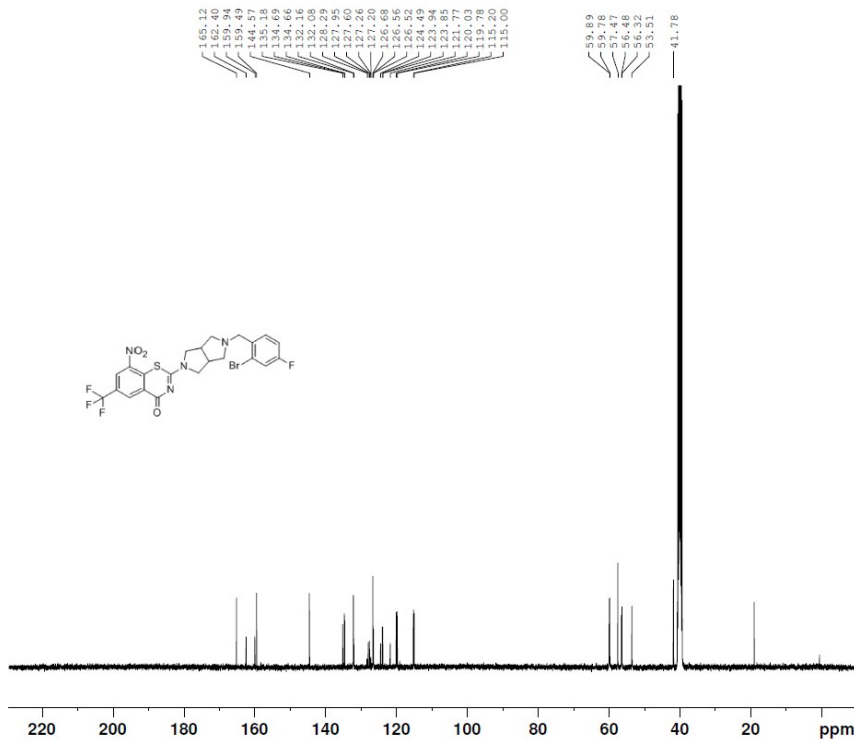

Current Data Parameters  
 NAME 20170607 TZY-3-33  
 EXPNO 1  
 PROCNO 1

F2 - Acquisition Parameters  
 Date\_ 20170609  
 Time 2.56  
 INSTRUM spect  
 PROBHD 5 mm CPPBBO BB  
 PULPROG zgpg30  
 TD 32768  
 SOLVENT DMSO  
 NS 4000  
 DS 4  
 SWH 24038.461 Hz  
 FIDRES 0.733596 Hz  
 AQ 0.6815744 sec  
 RG 77.6  
 DW 20.800 usec  
 DE 18.00 usec  
 TE 298.0 K  
 D1 1.00000000 sec  
 D11 0.03000000 sec  
 TD0 500

==== CHANNEL f1 =====  
 SFO1 100.6238345 Mhz  
 NUC1 13C  
 P1 9.84 usec  
 PLW1 38.00000000 W

==== CHANNEL f2 =====  
 SFO2 400.1316005 Mhz  
 NUC2 1H  
 CPDPRG[2] waltz16  
 PCPD2 80.00 usec  
 PLW2 8.14700031 W  
 PLW12 0.15600000 W  
 PLW13 0.09983800 W

F2 - Processing parameters  
 SI 32768  
 SF 100.6127690 Mhz  
 WDW EM  
 SSB 0  
 LB 1.00 Hz  
 GB 0  
 PC 1.40

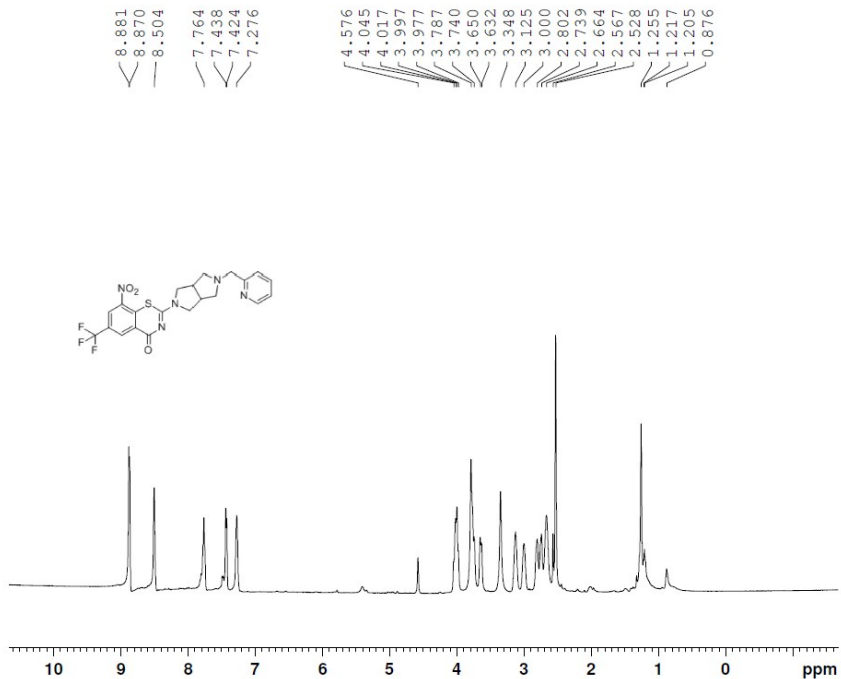

Current Data Parameters  
 NAME test2  
 EXPNO 1  
 PROCNO 1

F2 - Acquisition Parameters  
 Date\_ 20170531  
 Time 14.29  
 INSTRUM WNMRI-500MHz  
 PULPROG waltz16  
 TD 48000  
 SOLVENT DMSO  
 NS 16  
 DS 0  
 SWH 12000.000 Hz  
 AQ 2.0000000 sec  
 RG 60.8  
 DW 41.667 usec  
 DE 30.00 usec  
 TE 298.3 K

NUC1 1H  
 PL1 120.00 dB  
 SFO1 499.7053818 Mhz

F2 - Processing parameters  
 SI 32768  
 SF 499.7041375 Mhz  
 WDW EM  
 SSB 0  
 LB 1.00 Hz  
 GB 0.1  
 PC 1.00

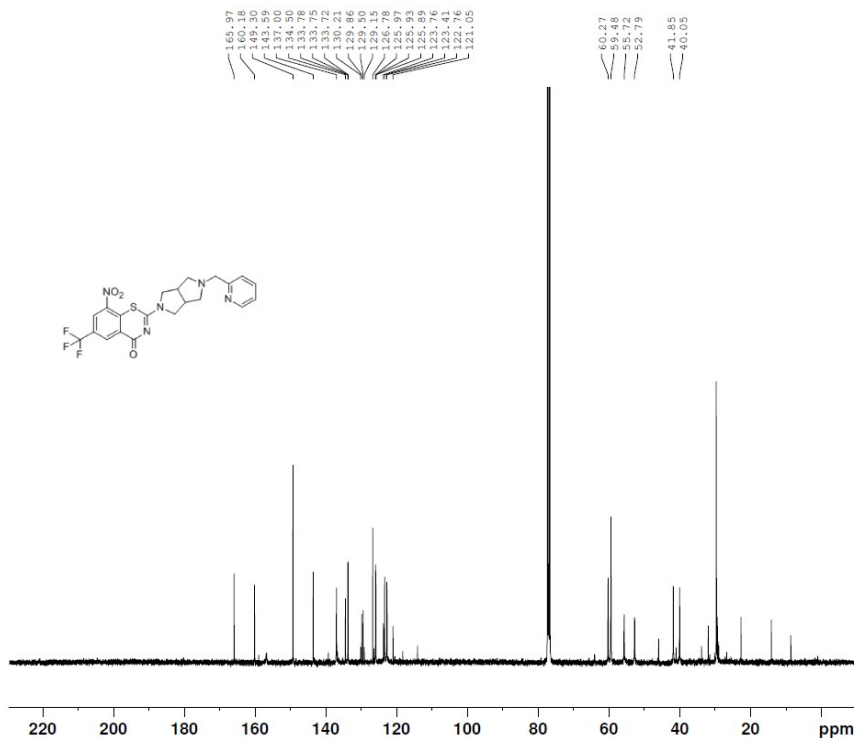

Current Data Parameters  
 NAME 20170607 test2  
 EXPNO 1  
 PROCNO 1

F2 - Acquisition Parameters  
 Date\_ 20170609  
 Time 6.54  
 INSTRUM spect  
 PROBHD 5 mm CPPBBO HB  
 PULPROG zgpg30  
 TD 32768  
 SOLVENT CDCl3  
 NS 3521  
 DS 4  
 SWH 24038.461 Hz  
 FIDRES 0.733596 Hz  
 AQ 0.6815744 sec  
 RG 77.6  
 DW 20.800 usec  
 DE 18.00 usec  
 TE 298.0 K  
 D1 1.00000000 sec  
 D11 0.03000000 sec  
 TD0 500

===== CHANNEL f1 =====  
 SFO1 100.6238345 MHz  
 NUC1 13C  
 P1 9.84 usec  
 PLW1 38.00000000 W

===== CHANNEL f2 =====  
 SFO2 400.1316005 MHz  
 NUC2 1H  
 CPDPRG2 waltz16  
 PCPD2 80.00 usec  
 PLW2 8.14700031 W  
 PLW12 0.15600000 W  
 PLW13 0.09983800 W

F2 - Processing parameters  
 SI 32768  
 SF 100.6127690 MHz  
 WDW EM  
 SSB 0  
 LB 1.00 Hz  
 GB 0  
 PC 1.40

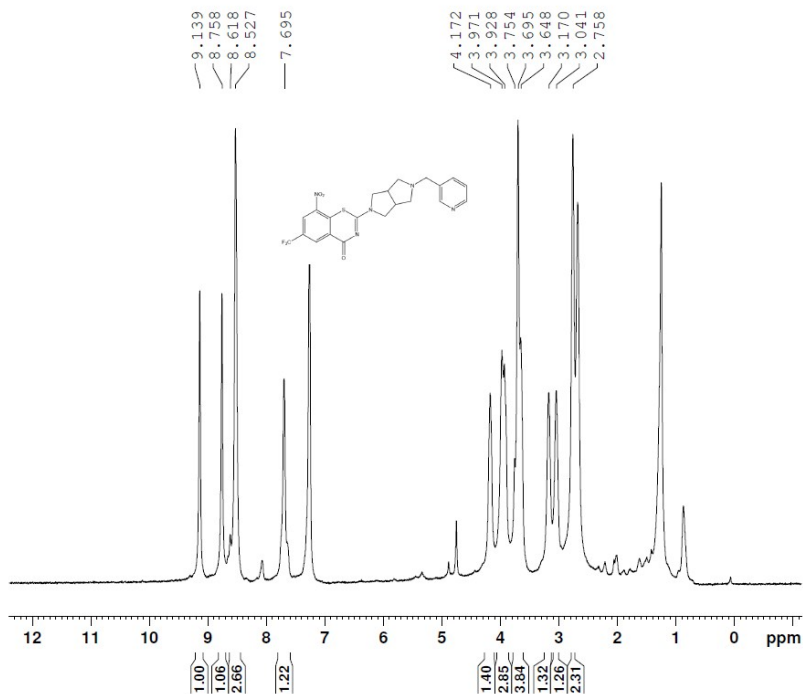

Current Data Parameters  
 NAME test3  
 EXPNO 1  
 PROCNO 1

F2 - Acquisition Parameters  
 Date\_ 20170612  
 Time 9.21  
 INSTRUM WNMN-I-500MHz  
 FULPROG siph1  
 TD 48000  
 SOLVENT CDCl3  
 NS 18  
 DS 0  
 SWH 12000.000 Hz  
 AQ 2.0000000 sec  
 RG 64.3  
 DW 41.667 usec  
 DE 30.00 usec  
 TE 298.1 K  
 NUC1 1H  
 PL1 120.00 dB  
 SFO1 499.7053818 MHz

F2 - Processing parameters  
 SI 32768  
 SF 499.6957858 MHz  
 WDW EM  
 SSB 0  
 LB 1.00 Hz  
 GB 0.1  
 PC 1.00



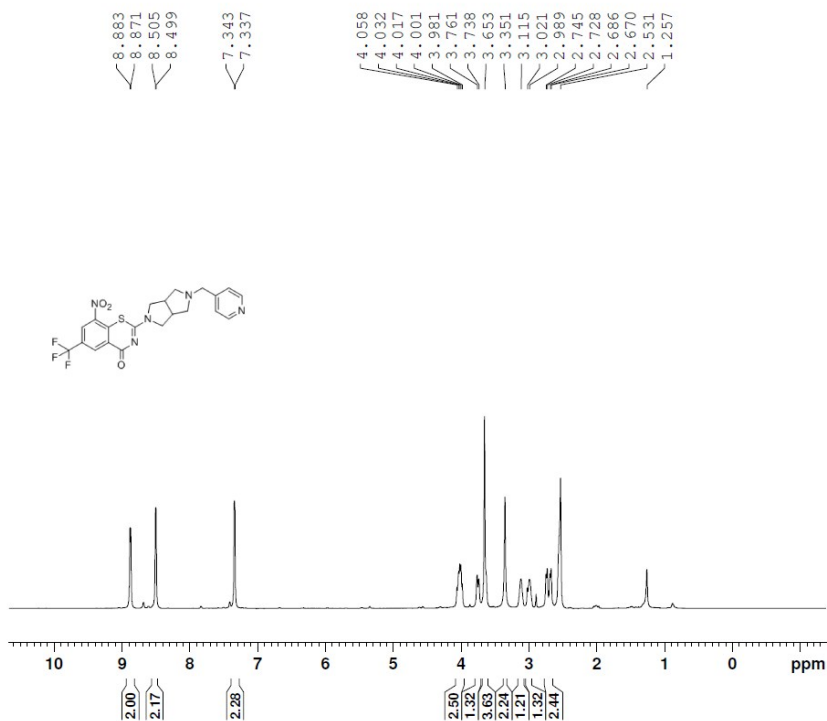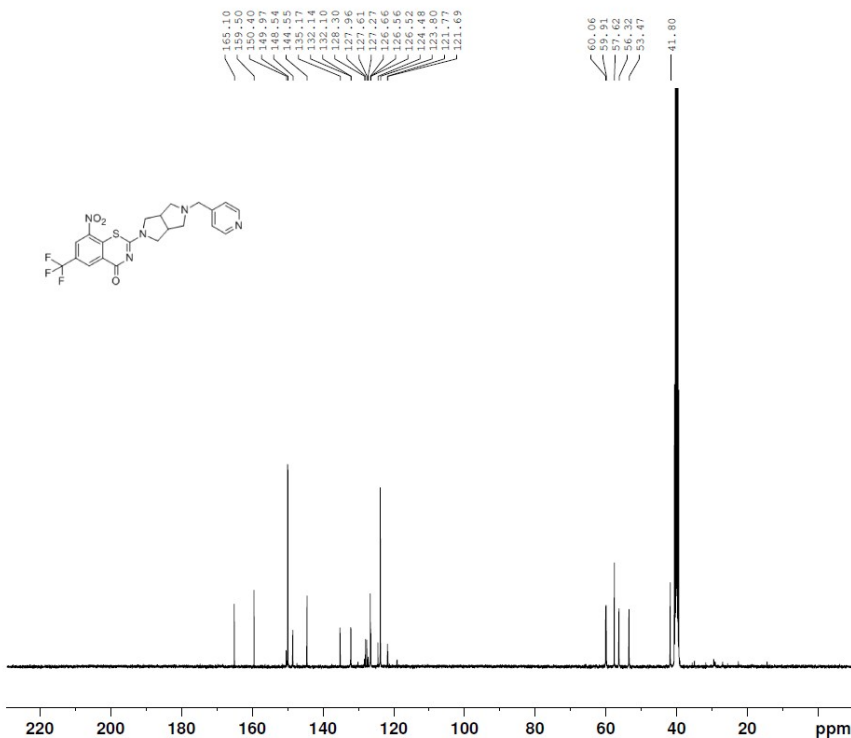

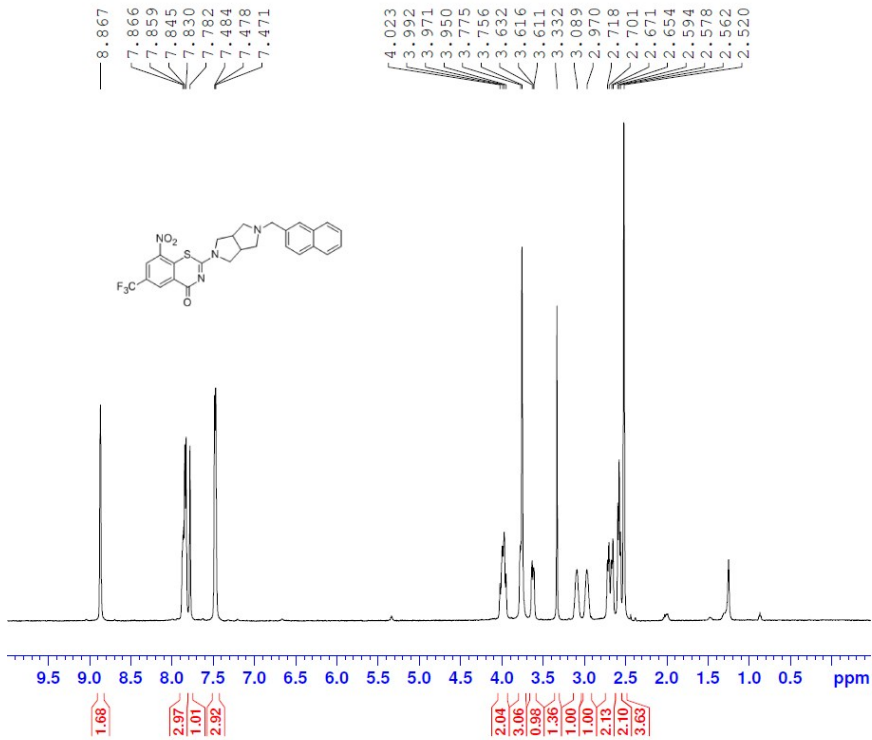

Current Data Parameters  
 NAME lq-2-79 20170525  
 EXPNO 1  
 PROCNO 1

F2 - Acquisition Parameters  
 Date\_ 20170525  
 Time 14.09  
 INSTRUM WNMN-1-500MHz  
 PULPROG sipul  
 TD 48000  
 SOLVENT DMSO  
 NS 13  
 DS 0  
 SWH 12000.000 Hz  
 AQ 2.0000000 sec  
 RG 61.4  
 DW 41.667 usec  
 DE 30.00 usec  
 TE 298.3 K  
 NUC1 1H  
 FL1 120.00 dB  
 SFO1 499.7053818 MHz

F2 - Processing parameters  
 SI 32768  
 SF 499.6981441 MHz  
 WDW EM  
 SSB 0  
 LB 1.00 Hz  
 GB 0.1  
 PC 1.00

Bruker AVANCEIII 400 20170526  
 C13 DMSO D:\DATA-2017 19

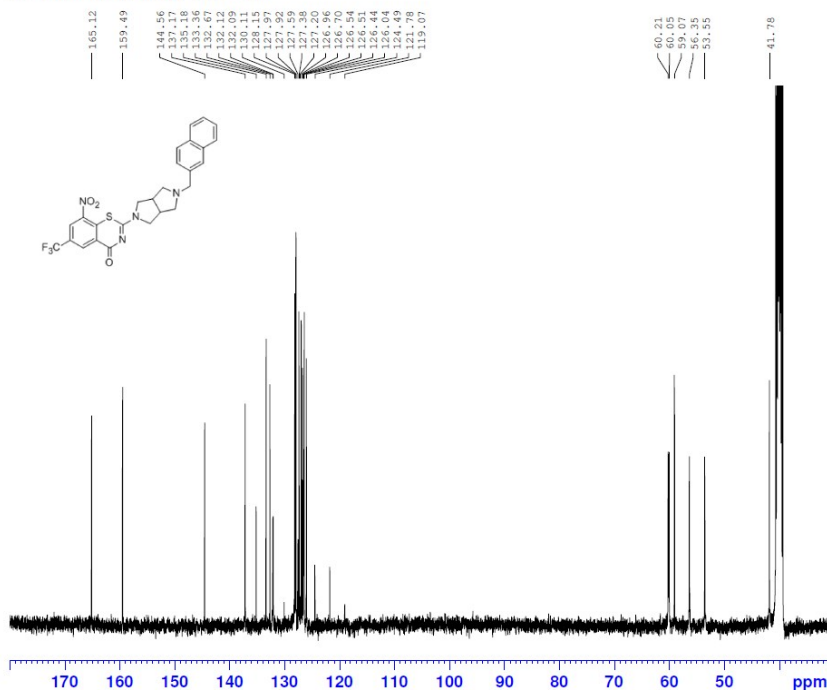

Current Data Parameters  
 NAME 20170526 lq-2-79  
 EXPNO 1  
 PROCNO 1

F2 - Acquisition Parameters  
 Date\_ 20170528  
 Time 14.24  
 INSTRUM spect  
 PROBHD 5 mm CPPBBO BB  
 PULPROG zgpg30  
 TD 32768  
 SOLVENT DMSO  
 NS 3200  
 DS 4  
 SWH 24038.461 Hz  
 FIDRES 0.733596 Hz  
 AQ 0.6815744 sec  
 RG 77.6  
 DW 20.800 usec  
 DE 18.00 usec  
 TE 298.0 K  
 D1 1.00000000 sec  
 D11 0.03000000 sec  
 TDO 400

===== CHANNEL f1 =====  
 SFO1 100.6238345 MHz  
 NUC1 13C  
 P1 9.84 usec  
 PLW1 38.00000000 W

===== CHANNEL f2 =====  
 SFO2 400.1316005 MHz  
 NUC2 1H  
 CPDPRG[2] waltz16  
 PCPD2 80.00 usec  
 PLW2 8.14700031 W  
 PLW12 0.15600000 W  
 PLW13 0.09983800 W

F2 - Processing parameters  
 SI 32768  
 SF 100.6127690 MHz  
 WDW EM  
 SSB 0  
 LB 1.00 Hz  
 GB 0  
 PC 1.40

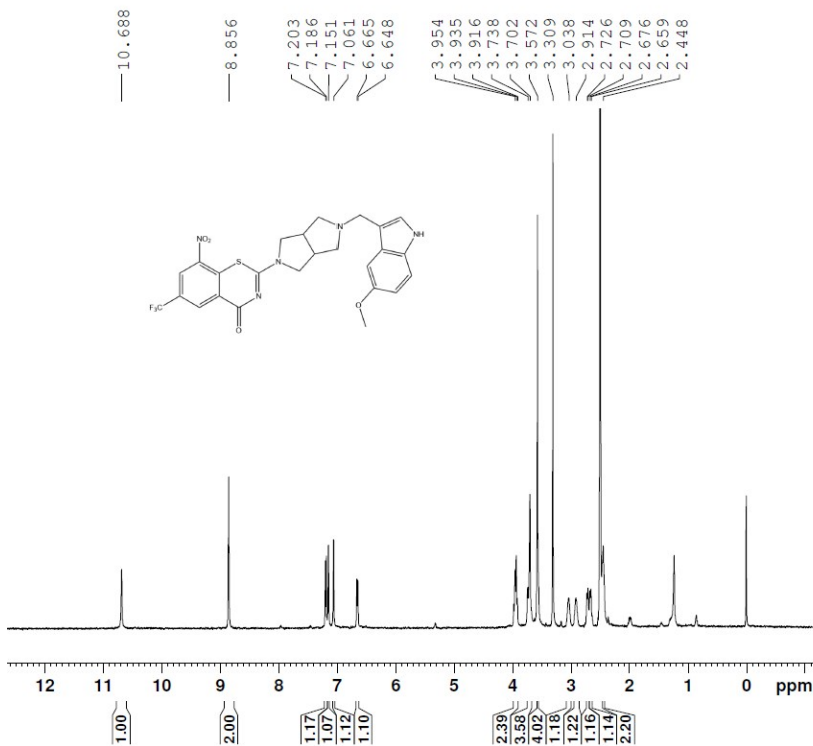

Current Data Parameters  
 NAME sn-2-6-0414  
 EXPNO 1  
 PROCNO 1

F2 - Acquisition Parameters  
 Date\_ 20170414  
 Time 16.04  
 INSTRUM WNMRI-500MHz  
 PULPROG sipul  
 TD 48000  
 SOLVENT DMSO  
 NS 8  
 DS 0  
 SWH 12000.000 Hz  
 AQ 2.0000000 sec  
 RG 71.6  
 DW 41.667 usec  
 DE 30.00 usec  
 TE 298.4 K  
 NUC1 1H  
 PL1 120.00 dB  
 SFO1 499.7053818 MHz

F2 - Processing parameters  
 SI 32768  
 SF 499.6981519 MHz  
 WDW EM  
 SSB 0  
 LB 1.00 Hz  
 GB 0.1  
 PC 1.00

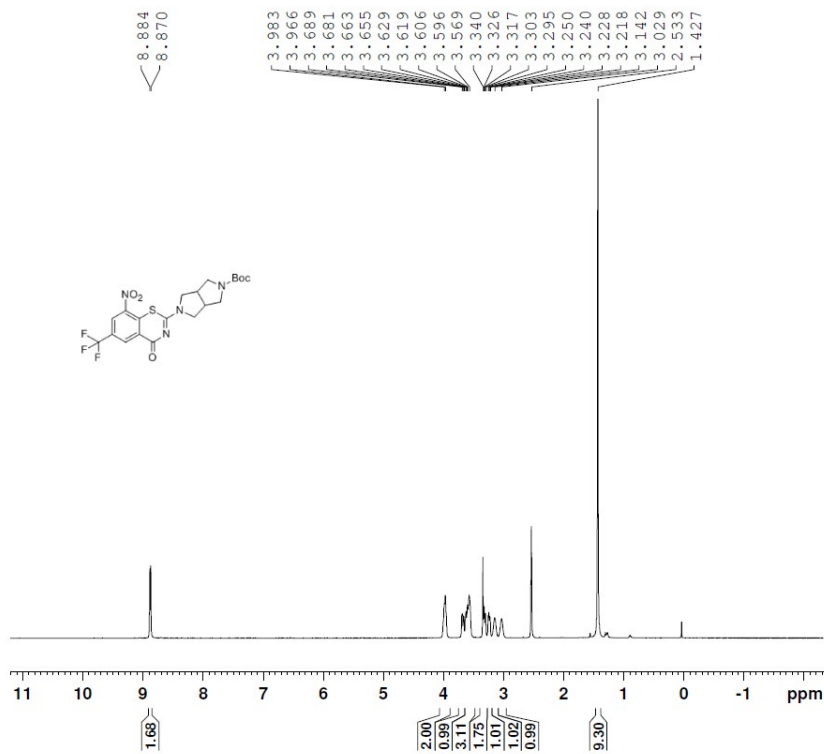

Current Data Parameters  
 NAME tzy-3-17  
 EXPNO 1  
 PROCNO 1

F2 - Acquisition Parameters  
 Date\_ 20170502  
 Time 15.08  
 INSTRUM WNMRI-500MHz  
 PULPROG sipul  
 TD 48000  
 SOLVENT DMSO  
 NS 16  
 DS 0  
 SWH 12000.000 Hz  
 AQ 2.0000000 sec  
 RG 63.8  
 DW 41.667 usec  
 DE 30.00 usec  
 TE 298.4 K  
 NUC1 1H  
 PL1 120.00 dB  
 SFO1 499.7053818 MHz

F2 - Processing parameters  
 SI 32768  
 SF 499.7041375 MHz  
 WDW EM  
 SSB 0  
 LB 1.00 Hz  
 GB 0.1  
 PC 1.00



Bruker AVANCEIII 400 20181228  
 C13 CDCl3 D:\DATA-2018 32

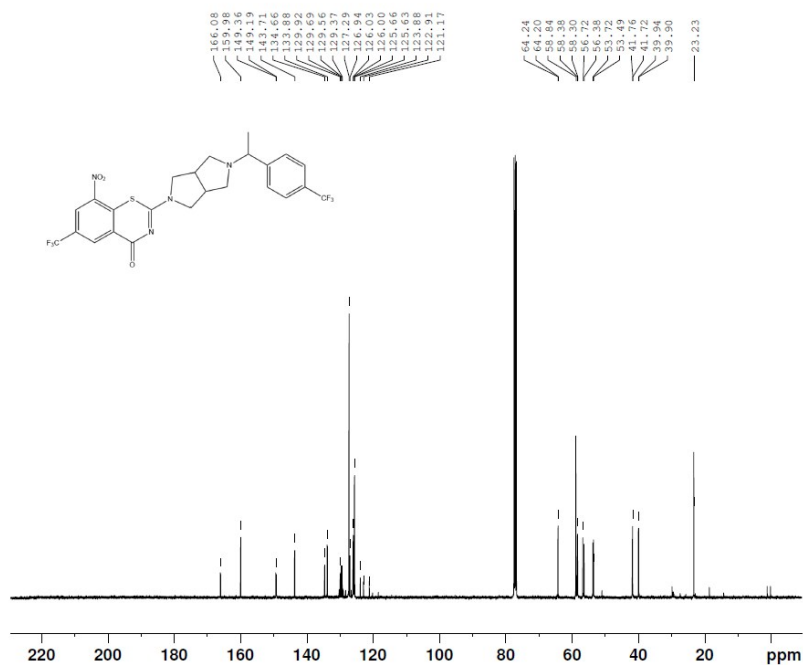

Current Data Parameters  
 NAME 20181228 hb-1-48  
 EXPNO 1  
 PROCNO 1

F2 - Acquisition Parameters  
 Date\_ 20181228  
 Time 14.39  
 INSTRUM spect  
 PROBHD 5 mm CPPBBO BB  
 PULPROG zgpg30  
 TD 32768  
 SOLVENT CDCl3  
 NS 1332  
 DS 4  
 SWH 24038.461 Hz  
 FIDRES 0.733596 Hz  
 AQ 0.6815744 sec  
 RG 77.6  
 DW 20.800 usec  
 DE 18.00 usec  
 TE 298.0 K  
 D1 1.00000000 sec  
 D11 0.03000000 sec  
 TD0 400

===== CHANNEL f1 =====  
 SFO1 100.6238345 MHz  
 NUC1 13C  
 P1 9.84 usec  
 PLW1 38.00000000 W

===== CHANNEL f2 =====  
 SFO2 400.1316005 MHz  
 NUC2 1H  
 CPDPRG2 waltz16  
 PCPD2 80.00 usec  
 PLW2 8.14700031 W  
 PLW12 0.22080000 W  
 PLW13 0.14131001 W

F2 - Processing parameters  
 SI 32768  
 SF 100.6127596 MHz  
 WDW EM  
 SSB 0  
 LB 1.00 Hz  
 GB 0  
 PC 1.40

Bruker AVANCEIII 400 20190102  
 C13 CDCl3 D:\DATA-2018 4

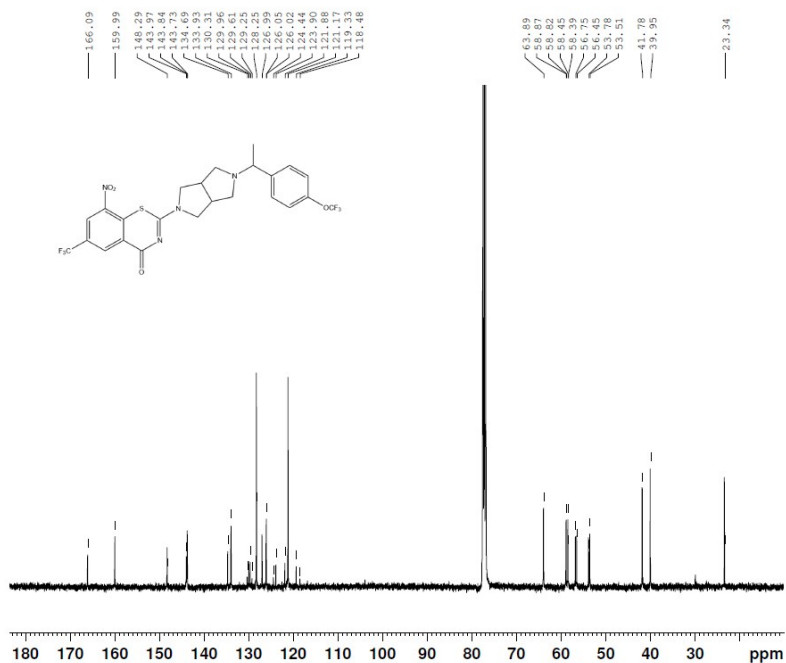

Current Data Parameters  
 NAME 20190102 hb-1-50  
 EXPNO 1  
 PROCNO 1

F2 - Acquisition Parameters  
 Date\_ 20190102  
 Time 21.34  
 INSTRUM spect  
 PROBHD 5 mm CPPBBO BB  
 PULPROG zgpg30  
 TD 32768  
 SOLVENT CDCl3  
 NS 4000  
 DS 4  
 SWH 24038.461 Hz  
 FIDRES 0.733596 Hz  
 AQ 0.6815744 sec  
 RG 77.6  
 DW 20.800 usec  
 DE 18.00 usec  
 TE 298.1 K  
 D1 1.00000000 sec  
 D11 0.03000000 sec  
 TD0 500

===== CHANNEL f1 =====  
 SFO1 100.6238345 MHz  
 NUC1 13C  
 P1 9.84 usec  
 PLW1 38.00000000 W

===== CHANNEL f2 =====  
 SFO2 400.1316005 MHz  
 NUC2 1H  
 CPDPRG2 waltz16  
 PCPD2 80.00 usec  
 PLW2 8.14700031 W  
 PLW12 0.22080000 W  
 PLW13 0.14131001 W

F2 - Processing parameters  
 SI 32768  
 SF 100.6127574 MHz  
 WDW EM  
 SSB 0  
 LB 1.00 Hz  
 GB 0  
 PC 1.40

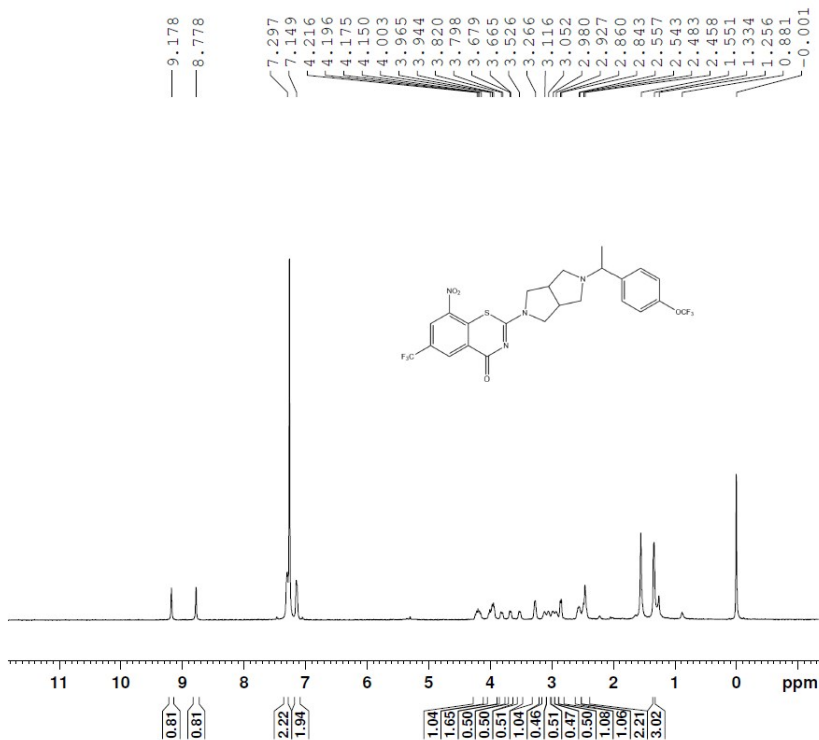

Current Data Parameters  
 NAME hb-1-50  
 EXPNO 1  
 PROCNO 1

F2 - Acquisition Parameters  
 Date\_ 20190114  
 Time 12.03  
 INSTRUM WNMRI-500MHz  
 PULPROG sfpul  
 TD 48000  
 SOLVENT CDCl3  
 NS 12  
 DS 0  
 SWH 12000.000 Hz  
 AQ 2.0000000 sec  
 RG 58.2  
 DW 41.667 usec  
 DE 30.00 usec  
 TE 298.1 K  
 NUC1 1H  
 PL1 120.00 dB  
 SFO1 499.687539 MHz

F2 - Processing parameters  
 SI 32768  
 SF 499.6801585 MHz  
 WDW EM  
 SSB 0  
 LB 1.00 Hz  
 GB 0.1  
 PC 1.00

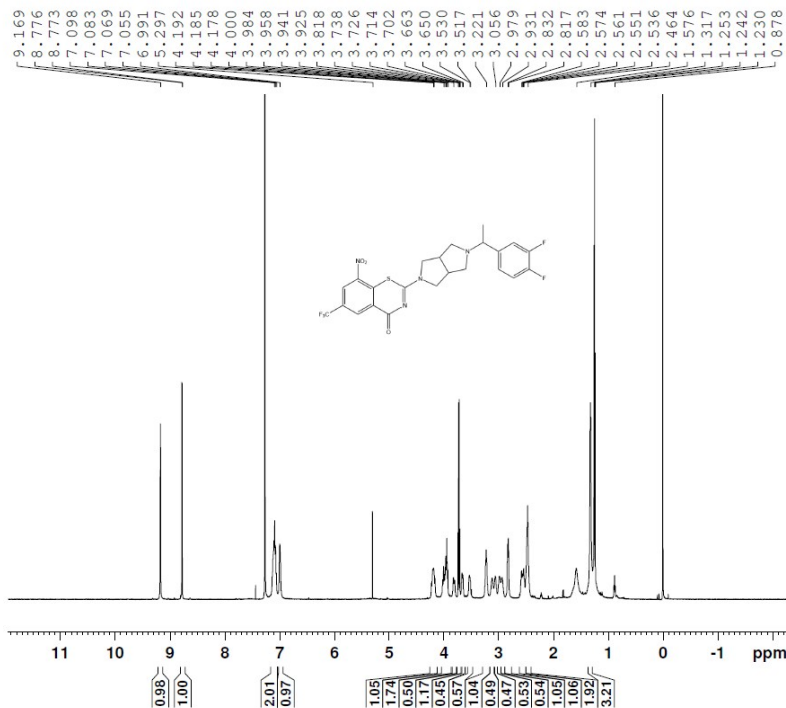

Current Data Parameters  
 NAME HB-1-56  
 EXPNO 1  
 PROCNO 1

F2 - Acquisition Parameters  
 Date\_ 20190124  
 Time 16.48 h  
 INSTRUM spect  
 PROBHD Z114607\_0230 ( )  
 PULPROG zg30  
 TD 65536  
 SOLVENT CDCl3  
 NS 16  
 DS 2  
 SWH 12019.230 Hz  
 FIDRES 0.366798 Hz  
 AQ 2.7262976 sec  
 RG 106.35  
 DW 41.600 usec  
 DE 6.50 usec  
 TE 300.0 K  
 D1 1.00000000 sec  
 TD0 1  
 SFO1 600.1337058 MHz  
 PO 3.32 usec  
 P1 9.97 usec  
 PLW1 25.38800049 W

F2 - Processing parameters  
 SI 65536  
 SF 600.1300158 MHz  
 WDW EM  
 SSB 0  
 LB 0.30 Hz  
 GB 0  
 PC 1.00

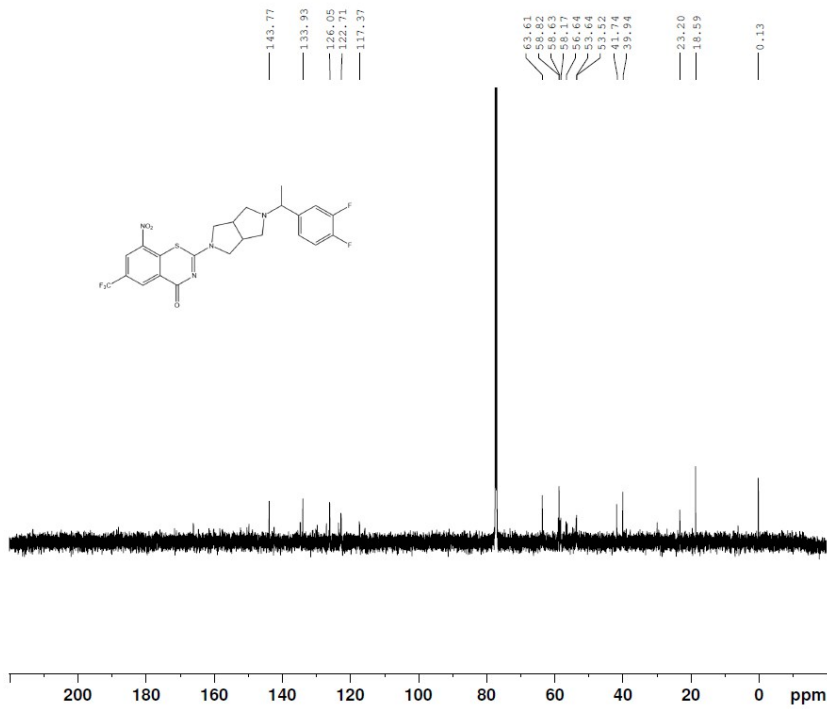

Current Data Parameters  
 NAME HB-1-56  
 EXPO 2  
 PROCNO 1

F2 - Acquisition Parameters  
 Date\_ 20190124  
 Time 17.40 h  
 INSTRUM spect  
 PROBHD Z114607\_0230 (  
 PULPROG zgpg30  
 TD 65536  
 SOLVENT CDCl3  
 NS 1024  
 DS 4  
 SWH 36231.883 Hz  
 FIDRES 1.105709 Hz  
 AQ 0.9043968 sec  
 RG 189.7  
 DW 13.800 usec  
 DE 6.50 usec  
 TE 300.0 K  
 D1 2.0000000 sec  
 D11 0.0300000 sec  
 TD0 1  
 SFO1 150.9178988 MHz  
 NUC1 13C  
 PO 3.87 usec  
 P1 11.60 usec  
 PLW1 89.20700073 W  
 SFO2 600.1324005 MHz  
 NUC2 1H  
 CPDPRG2 waltz65  
 PCPD2 70.00 usec  
 PLW2 25.38800049 W  
 PLW12 0.51502001 W  
 PLW13 0.25905001 W

F2 - Processing parameters  
 SI 32768  
 SF 150.9027872 MHz  
 WDW EM  
 SSB 0  
 LB 1.00 Hz  
 GB 0  
 PC 1.40

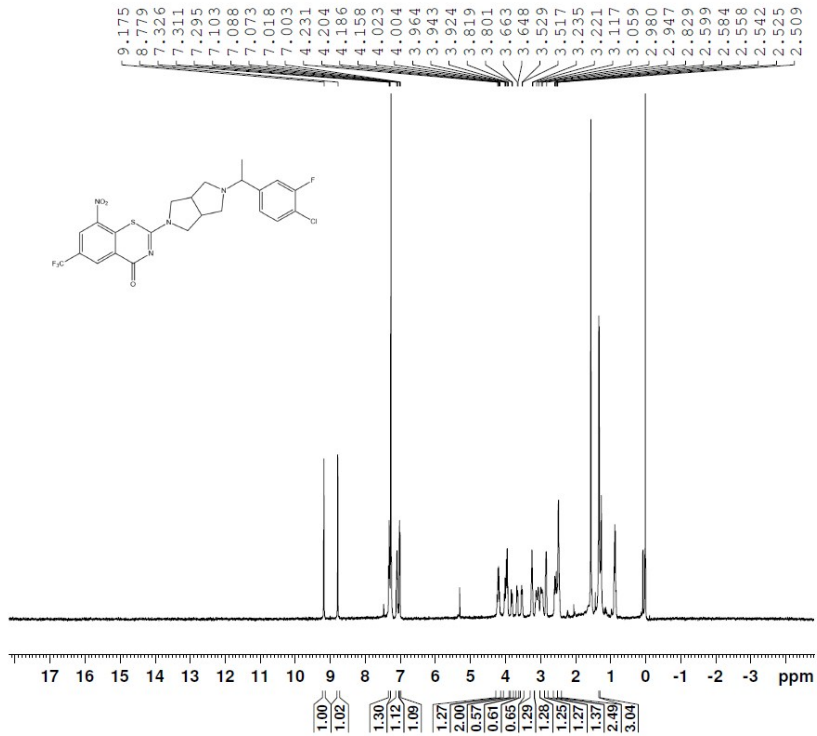

Current Data Parameters  
 NAME hb-1-58  
 EXPO 1  
 PROCNO 1

F2 - Acquisition Parameters  
 Date\_ 20190114  
 Time 12.07  
 INSTRUM WNMRI-500MHz  
 PULPROG spul  
 TD 48000  
 SOLVENT cdcl3  
 NS 6  
 DS 0  
 SWH 12000.000 Hz  
 AQ 2.0000000 sec  
 RG 35  
 DW 41.667 usec  
 DE 30.00 usec  
 TE 298.1 K  
 NUC1 1H  
 P1 120.00 dB  
 SFO1 499.6837539 MHz

F2 - Processing parameters  
 SI 32768  
 SF 499.6801589 MHz  
 WDW EM  
 SSB 0  
 LB 1.00 Hz  
 GB 0.1  
 PC 1.00

Bruker AVANCEIII 400 20190111  
 C13 CDCl3 D:\ DATA-2018 38

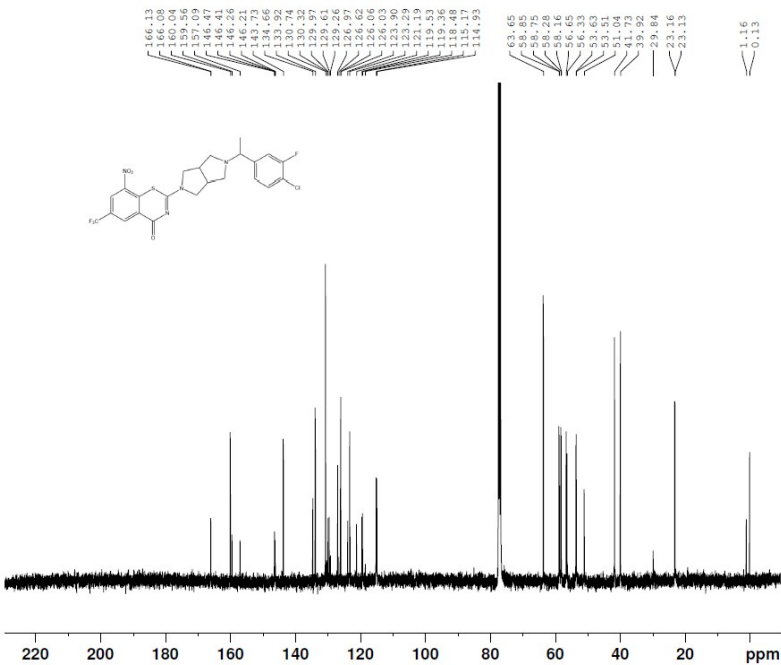

Current Data Parameters  
 NAME 20190111 hb-1-58  
 EXPNO 1  
 PROCNO 1

F2 - Acquisition Parameters  
 Date\_ 20190112  
 Time 0.14  
 INSTRUM spect  
 PROBHD 5 mm CPPBBO BB  
 PULPROG zgpg30  
 TD 32768  
 SOLVENT CDCl3  
 NS 4000  
 DS 4  
 SWH 24038.461 Hz  
 FIDRES 0.733596 Hz  
 AQ 0.6815744 sec  
 RG 77.6  
 DW 20.800 usec  
 DE 18.00 usec  
 TE 298.0 K  
 D1 1.00000000 sec  
 D11 0.03000000 sec  
 TD0 500

===== CHANNEL f1 =====  
 SFO1 100.6238345 MHz  
 NUC1 13C  
 P1 9.84 usec  
 PLW1 38.00000000 W  
 ===== CHANNEL f2 =====  
 SFO2 400.1316005 MHz  
 NUC2 1H  
 CPDPRG2 waltz16  
 PCPD2 80.00 usec  
 PLW2 8.14700031 W  
 PLW12 0.22080000 W  
 PLW13 0.14131001 W

F2 - Processing parameters  
 SI 32768  
 SF 100.6127574 MHz  
 WDW EM  
 SSB 0  
 LB 1.00 Hz  
 GB 0  
 PC 1.40

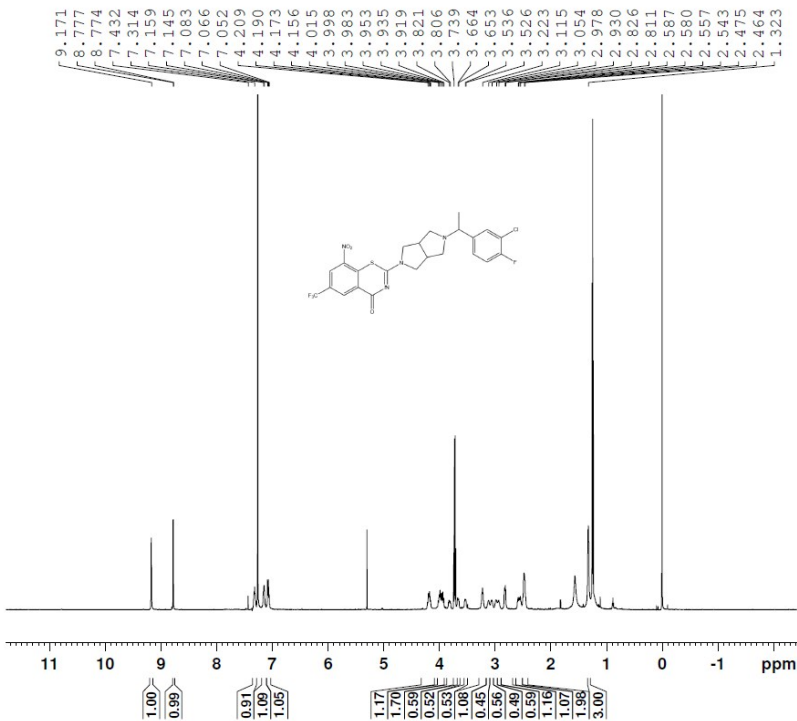

Current Data Parameters  
 NAME HB-1-68-ZC-3-cl-4-F  
 EXPNO 1  
 PROCNO 1

F2 - Acquisition Parameters  
 Date\_ 20190124  
 Time 17.45 h  
 INSTRUM spect  
 PROBHD Z114607\_0230 ( )  
 PULPROG zg30  
 TD 65536  
 SOLVENT CDCl3  
 NS 16  
 DS 2  
 SWH 12019.230 Hz  
 FIDRES 0.366798 Hz  
 AQ 2.7262976 sec  
 RG 121.15  
 DW 41.600 usec  
 DE 6.30 usec  
 TE 299.9 K  
 D1 1.00000000 sec  
 TD0 1  
 SFO1 600.1337058 MHz  
 NUC1 1H  
 P0 3.32 usec  
 P1 9.97 usec  
 PLW1 25.38800049 W

F2 - Processing parameters  
 SI 65536  
 SF 600.1300159 MHz  
 WDW EM  
 SSB 0  
 LB 0.30 Hz  
 GB 0  
 PC 1.00



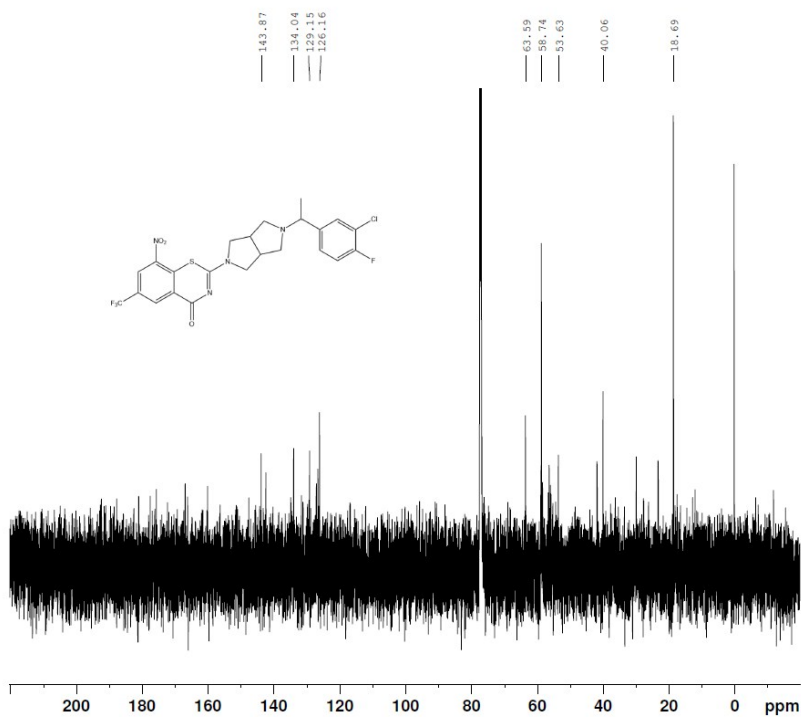

Current Data Parameters  
 NAME hb-1-68-ZC-3-cl-4-F  
 EXPNO 2  
 PROCNO 1

F2 - Acquisition Parameters  
 Date\_ 20190124  
 Time 18.37 h  
 INSTRUM spect  
 FPROBHD z114607\_0230 (4  
 PULPROG zgpg30  
 TD 65536  
 SOLVENT CDC13  
 NS 1024  
 DS 4  
 SWH 36231.883 Hz  
 FIDRES 1.105709 Hz  
 AQ 0.9043968 sec  
 RG 189.7  
 DW 13.800 usec  
 DE 6.50 usec  
 TE 300.0 K  
 D1 2.00000000 sec  
 D11 0.03000000 sec  
 TD0 1  
 SFO1 150.9178988 MHz  
 NUC1 13C  
 P0 3.87 usec  
 P1 11.60 usec  
 PLW1 89.20700073 W  
 SFO2 600.1324005 MHz  
 NUC2 1H  
 CPDPRG2 waltz165  
 PCPD2 70.00 usec  
 PLW2 25.38800049 W  
 PLW12 0.51502001 W  
 PLW13 0.25905001 W

F2 - Processing parameters  
 SI 32768  
 SF 150.9027717 MHz  
 WDW EM  
 SSB 0  
 LB 1.00 Hz  
 GB 0  
 PC 1.40

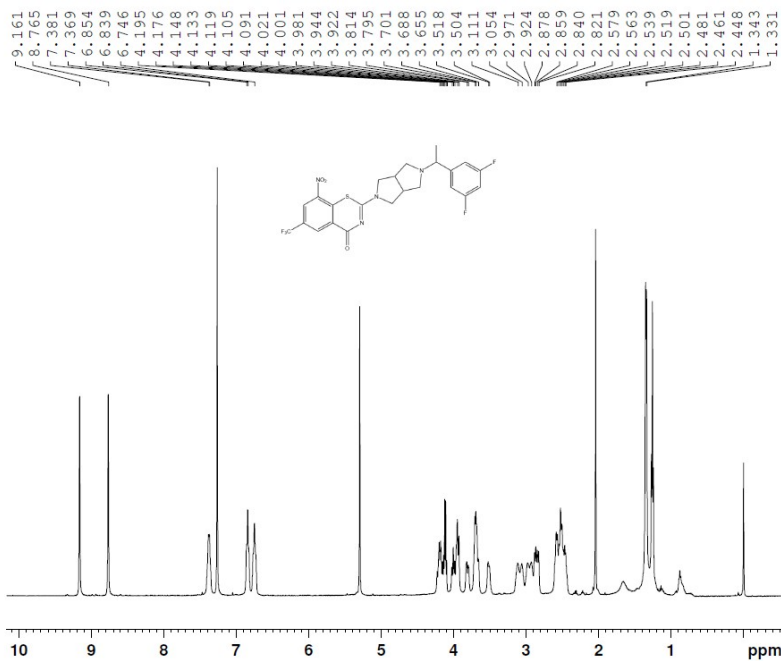

Current Data Parameters  
 NAME hb-1-65  
 EXPNO 1  
 PROCNO 1

F2 - Acquisition Parameters  
 Date\_ 20190122  
 Time 12.17  
 INSTRUM WNMN-1-500MHz  
 PULPROG s1pul  
 TD 48000  
 SOLVENT CDC13  
 NS 4  
 DS 0  
 SWH 12000.000 Hz  
 AQ 2.0000000 sec  
 RG 35  
 DW 41.667 usec  
 DE 30.00 usec  
 TE 298.1 K  
 NUC1 1H  
 PL1 120.00 dB  
 SFO1 499.6837539 MHz

F2 - Processing parameters  
 SI 32768  
 SF 499.6801596 MHz  
 WDW EM  
 SSB 0  
 LB 1.00 Hz  
 GB 0.1  
 PC 1.00



166.10  
165.14  
160.14  
152.24  
152.18  
150.51  
143.75  
138.60  
138.40  
129.94  
129.71  
126.07  
126.03  
121.45  
110.79  
110.68

63.60  
63.31  
58.68  
58.12  
56.49  
56.21  
53.96  
41.74  
41.69  
39.83  
23.12  
21.17  
14.33

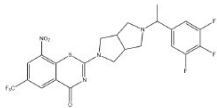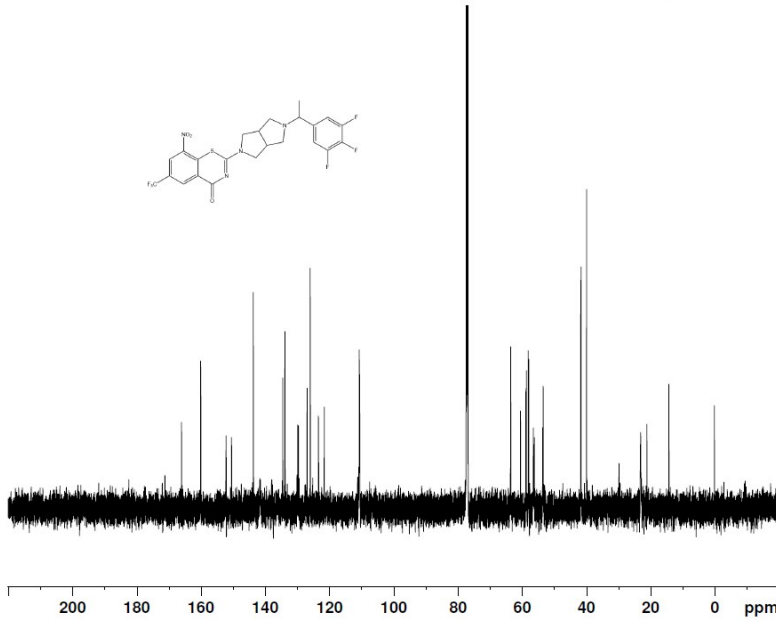

Current Data Parameters  
 NAME HB-1-67-ZC-3,4,5-trif  
 EXPNO 1  
 PROCNO 1

F2 - Acquisition Parameters  
 Date\_ 20190124  
 Time 12.04 h  
 INSTRUM spect  
 PROBHD Z114607\_0250 (   
 PULPROG zgpg30  
 TD 65536  
 SOLVENT CDCl3  
 NS 1024  
 DS 4  
 SWH 36231.883 Hz  
 FIDRES 1.105709 Hz  
 AQ 0.9043968 sec  
 RG 189.7  
 DW 13.800 usec  
 DE 6.50 usec  
 TE 300.0 K  
 D1 2.0000000 sec  
 D11 0.0300000 sec  
 TD0 1  
 SFO1 150.9178988 MHz  
 NUC1 13C  
 PO 3.87 usec  
 P1 11.60 usec  
 PLW1 89.20700073 W  
 SFO2 600.1324005 MHz  
 NUC2 1H  
 CPDPRG2 waltz65  
 PCPD2 70.00 usec  
 PLW2 25.38800049 W  
 PLW12 0.51502001 W  
 PLW13 0.25905001 W

F2 - Processing parameters  
 SI 32768  
 SF 150.9027883 MHz  
 WDW EM  
 SSB 0  
 LB 1.00 Hz  
 GB 0  
 PC 1.40
